1 **A rapid and efficient screening system for neutralizing antibodies and its application for the**  
2 **discovery of potent neutralizing antibodies to SARS-CoV-2 S-RBD**

3 Xiaojian Han<sup>1,2,\*</sup>, Yingming Wang<sup>1,2,\*</sup>, Shenglong Li<sup>1,2,\*</sup>, Chao Hu<sup>1,2</sup>, Tingting Li<sup>1,2</sup>, Chenjian Gu<sup>3</sup>, Kai  
4 Wang<sup>4</sup>, Meiying Shen<sup>5</sup>, Jianwei Wang<sup>1,2</sup>, Jie Hu<sup>4</sup>, Ruixin Wu<sup>1,2</sup>, Song Mu<sup>1,2</sup>, Fang Gong<sup>6</sup>, Qian Chen<sup>1,2</sup>,  
5 Fengxia Gao<sup>1,2</sup>, Jingjing Huang<sup>1,2</sup>, Yingyi Long<sup>1,2</sup>, Feiyang Luo<sup>1,2</sup>, Shuyi Song<sup>1,2</sup>, Shunhua Long<sup>1,2</sup>,  
6 Yanan Hao<sup>1,2</sup>, Luo Li<sup>1,2</sup>, Yang Wu<sup>3</sup>, Wei Xu<sup>3</sup>, Xia Cai<sup>3</sup>, Qingzhu Gao<sup>4</sup>, Guiji Zhang<sup>4</sup>, Changlong He<sup>4</sup>,  
7 Kun Deng<sup>7</sup>, Li Du<sup>1,2</sup>, Yaru Nai<sup>1,2</sup>, Wang Wang<sup>1,2</sup>, Youhua Xie<sup>3</sup>, Di Qu<sup>3</sup>, Ailong Huang<sup>4</sup>, Ni Tang<sup>4#</sup>,  
8 Aishun Jin<sup>1,2#</sup>

9  
10 <sup>1</sup>Department of Immunology, College of Basic Medicine, Chongqing Medical University, Chongqing,  
11 China

12 <sup>2</sup>Chongqing Key Laboratory of Basic and Translational Research of Tumor Immunology, Chongqing  
13 Medical University, Chongqing, China

14 <sup>3</sup>Key Laboratory of Medical Molecular Virology, Department of Medical Microbiology and  
15 Parasitology, School of Basic Medical Sciences, Shanghai Medical College, Fudan University

16 <sup>4</sup>Key Laboratory of Molecular Biology on Infectious Diseases, Ministry of Education, Chongqing  
17 Medical University, Chongqing, China

18 <sup>5</sup>Department of Breast Surgery, Harbin Medical University Cancer Hospital

19 <sup>6</sup>Yongchuan Hospital Affiliated to Chongqing Medical University

20 <sup>7</sup>The Third Affiliated Hospital of Chongqing Medical University, Chongqing, China

21 \*These authors contributed equally to this work.

22 #Correspondence: aishunjin@cqmu.edu.cn (A.S.J) or nitang@cqmu.edu.cn (N.T.)

23

24 **Abstract**

25 Neutralizing antibodies (Abs) have been considered as promising therapeutics for the prevention and  
26 treatment of pathogens. After the outbreak of COVID-19, potent neutralizing Abs to SARS-CoV-2 were  
27 promptly developed, and a few of those neutralizing Abs are being tested in clinical studies. However,  
28 there were few methodologies detailedly reported on how to rapidly and efficiently generate neutralizing  
29 Abs of interest. Here, we present a strategically optimized method for precise screening of neutralizing  
30 monoclonal antibodies (mAbs), which enabled us to identify SARS-CoV-2 receptor-binding domain  
31 (RBD) specific Abs within 4 days, followed by another 2 days for neutralization activity evaluation. By  
32 applying the screening system, we obtained 198 Abs against the RBD of SARS-CoV-2. Excitingly, we  
33 found that approximately 50% (96/198) of them were candidate neutralizing Abs in a preliminary  
34 screening of SARS-CoV-2 pseudovirus and 20 of these 96 neutralizing Abs were confirmed with high  
35 potency. Furthermore, 2 mAbs with the highest neutralizing potency were identified to block authentic  
36 SARS-CoV-2 with the half-maximal inhibitory concentration ( $IC_{50}$ ) at concentrations of 9.88 ng/ml and  
37 11.13 ng/ml. In this report, we demonstrated that the optimized neutralizing Abs screening system is  
38 useful for the rapid and efficient discovery of potent neutralizing Abs against SARS-CoV-2. Our study  
39 provides a methodology for the generation of preventive and therapeutic antibody drugs for emerging  
40 infectious diseases.

41 **Introduction**

42 Pandemic outbreaks of infectious diseases, such as three novel pathogenic human coronaviruses in the  
43 past two decades: severe acute respiratory syndrome coronavirus 2 (SARS-CoV-2), middle eastern  
44 respiratory syndrome coronavirus (MERS-CoV) and SARS-CoV, have caused high mortality and  
45 unprecedented social and economic consequences<sup>1-4</sup>. While vaccines are effective in blocking infectious  
46 diseases, antibody therapy is an alternative treatment strategy for preventing newly emerging viruses.  
47 During the outbreaks of SARS-CoV, MERS-CoV and SARS-CoV-2, convalescent plasma from these  
48 patients containing neutralizing mAbs was a safe and effective treatment option to reduce mortality in  
49 severe cases<sup>5,6</sup>. However, convalescent plasma are limited and polyclonal non-neutralizing Abs in the  
50 plasma may cause undesired side effects<sup>7</sup>. The neutralizing mAbs therapeutics are effective replacements  
51 of convalescent plasma therapy. A rapid and efficient neutralizing Abs screening method against  
52 infectious diseases is in great needs.

53 The outbreak of COVID-19 was caused by SARS-CoV-2. Its viral spike(S) containing the receptor-  
54 binding domain (RBD) is responsible for binding to the receptor angiotensin-converting enzyme-  
55 2(ACE2) receptor on the host cells<sup>8,9</sup>. To date, several teams have promptly developed some potent  
56 neutralizing mAbs to SARS-CoV-2<sup>10-22</sup>. In these studies, different methodologies were employed for  
57 screening of neutralizing Abs. Some studies utilized SARS-CoV-2 S - or RBD- labeled memory B cells  
58 from convalescent patients with SARS-CoV-2 infection and directly amplified Ab genes by RT-PCR  
59 and nested PCR at a single-cell level<sup>10,18</sup>. In other studies, plasma cells were activated and expanded with  
60 stimulators and cytokines in vitro for selecting neutralizing Abs<sup>14,19</sup>. Humanized mice were also used to  
61 generate full human monoclonal antibodies against S protein<sup>11,22</sup>. Furthermore, using single-cell  
62 sequencing technology in combination with the enrichment of antigen-specific B, some researchers  
63 quickly detected thousands of antigen specific mAbs sequences<sup>17,21</sup>. Although these studies showed that  
64 neutralizing antibodies against SARS-CoV-2 could be obtained from convalescence patients, few  
65 methodologies were reported in detail about how to generate neutralizing Abs of interest rapidly and  
66 efficiently.

67 Here, we describe a strategically optimized system for fast screening of neutralizing mAbs to achieve  
68 efficient and reliable yield of desired neutralizing Abs in as short as 6 days. A total of 198 Abs against  
69 RBD of SARS-CoV-2 were obtained with this method, and 50% of them were potential candidate  
70 neutralizing Abs in a preliminary screening of pseudovirus system. Furthermore, 20 of these neutralizing

71 mAbs are confirmed with high potency, and 2 mAbs reached IC<sub>50</sub> in nanogram range. Therefore, the  
72 screening system can generate a large number of neutralizing mAbs for the discovery of potent antibody  
73 drugs, providing vital information to understand the characteristics of new viruses, and, collectively, to  
74 develop preventative and therapeutic strategies for newly emerging infectious diseases in the future.

## 75 **Results**

76 **Establishment of a rapid and efficient neutralizing Abs screening system.** Previously we had  
77 obtained specific mAbs from PBMC of vaccinated volunteers via microwell array chips within only one  
78 week<sup>23</sup>. Here, we established the optimized screening system based on the memory B cells from the  
79 PBMC to obtain neutralizing mAbs rapidly and efficiently (Figure 1). At first, we collected the blood  
80 samples and isolated the PBMC from a panel of Chinese convalescent patients infected with SARS-CoV-  
81 2 in February. RBD specific memory B cells (mB cells) in a pooled PBMC from 5-7 blood samples were  
82 detected by labeling with RBD. RBD-specific mB cells were sorted into 96-well PCR plates in a single-  
83 cell manner. Each single-cell Ab cDNA was amplified, and the immunoglobulin heavy (IGH) and light  
84 chains (IGK and IGL) of the variable region were obtained by RT-PCR and nested PCR with the  
85 optimized primers at Day 1 (Table S4. Primers List of BCR PT-PCR). Recombinant sites were introduced  
86 by the nested primers during the 2<sup>nd</sup> PCR. Next, linear antibody gene expression cassettes were  
87 assembled by overlapping PCR, which contained the essential elements for Ab gene transcription,  
88 including the CMV promoter, the antibody variable region, the constant region and the poly(A) tail. Then  
89 HEK293T cells were transiently transfected with these linear antibody gene expression cassettes, for the  
90 expression of recombinant antibodies at Day 2. Culture supernatants of the transfected cells were  
91 evaluated for the S and RBD specific binding activity by enzyme-linked immunosorbent assays (ELISA)  
92 at Day 4, and their pseudovirus neutralizing capacity was tested in HEK293T/hACE2 cells at Day 6. The  
93 screening system allowed us to harvest a large number of potential neutralizing Abs against SARS-CoV-  
94 2 within only 6 days. Furthermore, recombinant antibody proteins of interest were expressed and purified  
95 for subsequent functional analysis, including antibody specific binding ability, viral neutralization and  
96 antigen-binding affinity, all of which were completed with an additional 9 days.

97 Compared with conventional methods for screening neutralizing Abs<sup>10,13,14,17,21</sup>, a few strategically  
98 optimized details of our screening system were described as following (Figure S1. The optimization of  
99 the screening platform). First, we collected the blood samples from convalescent patients with COVID-

100 19. These patients were the earliest confirmed cases of SARS-CoV-2 infection in Chongqing City, over  
101 half of the patients who had a history of close contact with the earliest infectors. Antigen specific B cells  
102 from memory B cells experienced affinity maturation and somatic hypermutation<sup>24,25</sup>. Thus, RBD  
103 specific memory B cells in these patients were potentially useful candidates to screen out the potent  
104 neutralizing Abs. Second, we sorted the CD19<sup>+</sup>IgD<sup>-</sup>IgG<sup>+</sup> memory B cells in the pooled PBMC samples  
105 from multi-patients to achieve a higher probability in antibody diversity. We then utilized RBD of SARS-  
106 CoV-2 as the bait to label the specific memory B cells. Removing dead cells was essential for sorting of  
107 the relatively rare RBD specific mB cells, which only occupied less than 1% of CD19<sup>+</sup>IgD<sup>-</sup> IgG<sup>+</sup> memory  
108 B cells (Figure S2. The influence of dead cells on the sorting of RBD-specific memory B cells).  
109 Additional improvements were applied to the single-B cell receptor (BCR) cloning<sup>26,27</sup> and expression  
110 (Figure S3. Schematic diagram of BCR RT-PCR and linear expression cassettes construction). We chose  
111 the initial 20 nucleotides located at 5' end of the signal peptide in Ab genes as the forward primers in the  
112 1<sup>st</sup> PCR step, and the adaptor primer in the 2<sup>nd</sup> PCR step. This was beneficial for reducing potential loss  
113 of BCR clones caused by SNP at the primer binding sites. Besides, the 2<sup>nd</sup> PCR products containing the  
114 adaptor primer could be used for the simultaneous construction of linear gene expression cassettes and  
115 plasmids without the extra-modification. with Ab J-region primers in the 2<sup>nd</sup> PCR, we are able to improve  
116 the recombination efficiency of linear cassettes approaching 100%. Our strategy of linear gene cassettes  
117 skipped the process of plasmid construction, which could reduce time-consuming procedures and labor,  
118 and be more suitable for a large scale of antibody screening<sup>28</sup> (Table S6. The annotation of linear antibody  
119 expression cassettes). Taken together, we optimized a methodology for the rapid and efficient  
120 identification of neutralizing Ab candidates (Figure S3A, Table S3-S6).

121 **Detection and isolation of RBD specific memory B cells.** To apply our established screening system  
122 of neutralizing Abs, we collected the plasma and PBMC from 39 convalescent patients with COVID-19  
123 admitted to Chongqing Medical University affiliated Yongchuan Hospital (Table S1. Patient Information).  
124 These convalescent plasma had been preliminarily screened for positive virus-specific binding and  
125 neutralization capacity, using a magnetic chemiluminescence enzyme immunoassay (MCLIA) and a  
126 pseudovirus-based assay<sup>29</sup>. Using ELISA assay, we confirmed that those Abs targeting Spike or  
127 recombinant RBD of SARS-CoV-2, SARS-CoV, and MERS-CoV in the plasma with 10-fold dilution.  
128 Among these convalescent patient samples, 36 plasma showed high reactivity to SARS-CoV-2 S or RBD  
129 proteins, while the other three patients had weak reactivity to these antigens (Figure 2A). Almost all

130 samples had cross-reactivity to the S1 protein of SARS-CoV and MERS-CoV with 10- or 100-fold  
131 dilution, while the healthy donor's plasma react to none of these three coronaviruses (Figure 2A). With  
132 these findings, we felt confident that all samples could be used for the specific mAb isolation.

133 Since RBD is the key domain for the SARS-CoV-2 S protein to interact with human cell surface ACE2  
134 receptor, the recombinant RBD was employed to detect the specific memory B cells via flow cytometry.  
135 We analyzed RBD-specific memory B cells by a gating strategy of Dead\_Dye-CD19<sup>+</sup>IgG<sup>+</sup>IgD<sup>-</sup>  
136 RBD<sup>+</sup> cells (Figure 2B), the proportion of which was less than 1% in IgD<sup>-</sup>IgG<sup>+</sup> memory B cells (ranging  
137 from 0.1% to 0.33%, Figure 2C). These RBD-specific mB cells were then sorted into 96-well plate one  
138 cell per well for Ab gene isolation. Immunoglobulin heavy and light chains were amplified by nested  
139 PCR from the sorted single mB cells (Figure S3B). The amplified products were cloned into linear  
140 expression cassettes to produce full-length IgG1 antibodies (Figure S3B). After three rounds of screening,  
141 a total of 497 paired heavy chains and light chains of Ab genes were obtained from the sorted RBD-  
142 specific memory B cells (Table S2. Three batches of S-RBD specific B memory cell sorting).

143 **Specificity and neutralization of Abs expressed by linear expression cassettes.** The amplified  
144 products with heavy chains and light chains of Ab genes were separately cloned into linear expression  
145 cassettes. We then transfected HEK293T cells with these linear expression cassettes to identify the  
146 specificity of these Abs. Antibodies within the supernatant of transfected HEK293T cells were screened  
147 by ELISA for their binding capability to the recombinant S1 and RBD protein of SARS-CoV-2. In total,  
148 we identified 198 RBD specific antibody genes from the 497 pair Ab genes (Figure 3A). To assess the  
149 neutralization ability of these specific antibodies, we used pseudovirus bearing SARS-CoV-2 S protein  
150 to infect 293T/hACE2 cells. Interestingly, 96 out of 198 antibodies (48.5%) showed the potential ability  
151 to block pseudovirus with an inhibitory rate of over 75% (Figure 3A), suggesting that RBD region was  
152 an ideal candidate to screen neutralizing Abs for blocking SARS-CoV-2. These results demonstrated that  
153 our screening system can rapidly and efficiently screen neutralizing Abs using patients' specific memory  
154 B cells.

155 **Sequence analysis for the diversity of RBD-specific Abs.** We then successfully sequenced 169 RBD-  
156 specific Abs. Among them, 158 (93.5%) Abs had unique patterns of distribution with various gene  
157 clusters (Figure S4. Usage and pairing of heavy and light chain for all specific antibodies). We also  
158 analyzed the distribution of heavy chain and light chain gene clusters according to neutralizing capability  
159 of mAbs tested by pseudovirus assays, as shown in Figure 3B and Figure S4A. Abs with neutralizing

160 rate over 75% to block pseudovirus were termed as potential neutralizing Abs (pote-nAbs). The almost  
161 sequenced Abs were transcribed from the IGHV1-IGHV5 for the heavy chain and IGKV1-IGKV3 and  
162 IGLV1-IGLV3 for light chain (Figure S5). We found that close to 50% of the pote-nAbs were specifically  
163 transcribed from IGHV3 for the heavy chain, and from IGKV1 for the light chain (Figure S5.  
164 Phylogenetic analysis of VH (up) and VL (down) genes for RBD-binding antibodies). Interestingly, we  
165 found that all mAbs encoded by IGHV3-66 were pote-nAbs (Figure 3B), and the IGHV3-66 family  
166 paired with IGKV1-33, IGKV1-9 and IGLV1-40 (Figure S4C). Additionally, a large number of mAbs  
167 encoded by IGKV1-39 were pote-nAbs (Figure S4A). Of note, we found that IGKV1-39 gene cluster  
168 also paired with a bundle of heavy chains to express RBD specific mAbs (Figure S4C), which was  
169 consistent with previous reports <sup>11,19</sup>.

170 The heavy chain complementarity determining region 3 (CDRH3) is the most variable region of an  
171 antibody in amino acid compositions and lengths. The average length of CDRH3 in the naive human  
172 repertoire is round 15 amino acids with a normal distribution<sup>30</sup>. We observed that the CDRH3 lengths of  
173 the specific mAbs were mainly distributed between 11-19 amino acids, while the overall CDRH3 lengths  
174 matched the skew distribution (Figure 3C). Most of the potent-Abs contained 11-16 amino acids (Figure  
175 3C). The mean CDRH3 length of isolated SARS-CoV-2 S-RBD-specific mAb cells differs substantially  
176 from that of other viral infections, such as HIV and influenza virus<sup>31,32</sup>. In terms of the CDR3 light chain  
177 (CDRL3) lengths, a range of 6 to 13 amino acids were observed, with similar skew distribution (Figure  
178 S4B).

179 **Potent neutralizing ability and antigen affinity of mAbs.** The variable regions of potential neutralizing  
180 Abs were cloned into antibody expression vectors to construct Ab plasmids. We successfully harvested  
181 73 purified mAbs, from a total of 96 potential neutralizing mAbs that were produced by transfecting  
182 Expi293F cells. When we tested the specificity of purified mAbs by ELISA, we found 65 Abs that formed  
183 tight interaction with SARS-CoV-2 S1 and SARS-CoV-2 RBD (Figure 4A). Next, these mAbs were  
184 assessed with RBD-ACE2 interaction blocking assay to confirm their neutralizing ability *in vitro*. We  
185 found that 71% of them could block the interaction between ACE2 and RBD (Figure 4B).

186 Forty-eight purified mAbs were evaluated for their neutralizing potency using the authentic SARS-CoV-  
187 2 cytopathic effect (CPE) inhibition assay, and the results were listed according to the order of inhibitory  
188 potency (Figure 5A). We successfully obtained a total of 20 antibodies that were able to completely block  
189 the authentic SARS-CoV-2 infection with the concentrations of 1 µg/ml. The top level 2 mAbs on the

190 list were termed as the most potent neutralizers (completely inhibition < 0.14  $\mu\text{g/ml}$ ), and another 18  
191 mAbs as the moderate neutralizers (0.29-1.17  $\mu\text{g/ml}$ ). The  $\text{IC}_{50}$  of the most potent neutralizers (58G6,  
192 510A5) were determined by RT-qPCR method using authentic SARS-CoV-2 virus infection. We found  
193 that the  $\text{IC}_{50}$  values of 58G6 and 510A5 were 9.98 ng/ml and 11.13 ng/ml, respectively (Figure 5B).  
194 Therefore, we tested the binding affinity of 58G6 and 510A5 to SARS-CoV-2 S-RBD via the surface  
195 plasmon resonance (SPR) assay. The measured equilibrium constant (Kd) of 58G6 with SARS-CoV-2 S-  
196 RBD was 0.385 nM and that of 510A5 was 7.8 nM, respectively (Figure 5C). In our study, 58G6 and  
197 510A5 are the best mAbs with potent neutralization and high affinity against SARS-CoV-2.

## 198 **Discussion**

199 Neutralizing antibodies were considered as an ideal medicine for prophylaxis and treatment of infectious  
200 diseases<sup>33</sup>. At present, several potent neutralizing Abs to SARS-CoV-2 have been promptly developed  
201 and being tested in clinical trials (clinicaltrials.gov NCT04497987, NCT04426695 and NCT04425629)  
202 for treating COVID-19 patients<sup>12-15,17,19-21,34,35</sup>. These reports showed that even though neutralizing  
203 antibodies against SARS-CoV-2 could be obtained from convalescent patients, the success rate to  
204 discover potent neutralizing antibodies with therapeutic value remains unideal. In this study, we  
205 described a strategically optimized screening method to discover potent mAbs from a large number of  
206 potential neutralizing Abs.

207 In general, here is how researchers obtain neutralizing antibodies. Blood samples were collected from  
208 convalescent patients with SARS-CoV-2 infection, and PBMC were separated in order to isolate SARS-  
209 CoV-2 specific B cells. Then the paired heavy and light chain sequences of Ab genes were obtained either  
210 in a single-cell PCR manner<sup>10,12,15,18</sup>, or directly by high-throughput single-cell sequencing<sup>17,21</sup>. In our  
211 study, we obtained the paired Ab genes at the single-cell level, and optimized steps of a screening  
212 workflow for neutralizing Abs, we were able to obtain the most potent neutralizing Abs with high speed  
213 and efficiency.

214 Firstly, we optimized the specificity of antibody isolation to increase target neutralizing Abs probability.  
215 Because the key sites of RBD have been clearly demonstrated to be essential for ACE2 binding during  
216 SARS-CoV-2 entry<sup>8,36</sup>, we chose to sort RBD-specific memory B cells for the isolation of heavy and  
217 light chains. It has been evidenced that RBD-specific neutralizing Abs can inhibit SARS-CoV-2 entry to  
218 host cells<sup>10</sup>, we have observed similar findings with pseudovirus infection (Figure 3). Recent reports have



219 demonstrated that when SARS-CoV-2 S was used as bait to label antigen-specific mB cells, it could  
220 result in a large of undesired antibodies against over-broad antigenic sites belonging to non-RBD  
221 regions<sup>12,17</sup>. When we used RBD as bait to isolate antibodies from mB cells, we found the obtained mAbs  
222 were more effective in blocking authentic viruses (Figure 5), which might largely due to the fact that  
223 RBD was enriched with the ACE2 binding epitopes.

224 Secondly, we optimized multiple steps to improve the efficiency of nAb screening. This has been  
225 achieved by smarter primer design, application of linear expression cassettes and preliminary  
226 neutralization assay to exclude non-neutralizing Abs, and these will be discussed in detail. Initially, we  
227 designed primers targeting the initial 20 nucleotides at the 5' end of the signal peptide of Ab genes as the  
228 forward primers in the 1st PCR step. This can reduce the loss of BCR clones caused by SNP at the primer  
229 binding sites. Also, we added an adaptor primer in the 2<sup>nd</sup> PCR step. Such adaptor with the same  
230 sequences as downstream recombination sites was convenient for the next PCR and recombinant  
231 plasmids construction, which could be suitable for high-throughput screening of specific Abs. Next, we  
232 successfully constructed linear expression cassettes with heavy chains or light chains, to rapidly identify  
233 the specificity of Abs. Construction of the linear expression cassettes was much easier than plasmids,  
234 which could drastically reduce the workload and time. Moreover, the linear Ab gene expression cassettes  
235 expressed in the cell supernatants of HEK293T cells were evaluated for neutralization activity on the  
236 sixth day. Neutralizing Abs account for approximately 50% of RBD-specific Abs, as shown in Figure  
237 3A. By detecting the ability of purified mAbs to block the interaction of RBD with ACE2, we could filter  
238 out only those Abs with neutralizing activities, to be applied in the subsequent steps. Together, these  
239 optimizations allowed us to finish one round of the screening for neutralizing Abs in, as short as, 15 days.  
240 The details of this optimized steps of our established methodology are shown (Figure S3, Table S03~S05).  
241 Thirdly, we used both authentic SARS-CoV-2 cytopathic effect (CPE) inhibition assay and quantitative  
242 analysis by RT-qPCR to ensure the accuracy of our findings, which lead to the successful identification  
243 of 20 potent neutralizing antibodies that can completely block authentic virus infection, at concentrations  
244 1.17 µg/ml. And the top two antibodies (58G6 and 510A5) generated IC<sub>50</sub> values at around 10 ng/ml,  
245 which were, as far as we know, two of the most potent neutralizing mAbs discovered to date.

246 Last but not least, we reduced duplicating clones by sample selection and increased the efficiency of  
247 BCR cloning by adjusting gating strategy. It has been reported that substantial mAbs clones to SARS-  
248 CoV-2 expanding in the individual patient sample is relatively common<sup>13,18</sup>. In our study, almost all RBD-

249 specific mAb clones were different from one another, while the proportion of clonal expansion was only  
250 6.5% in all sequences, as compared to approximately 20%<sup>13,18</sup>. It could result from our pooled PBMC  
251 for sorting RBD-specific memory B from 5-7 convalescent COVID-19 patients. Therefore, it is  
252 beneficial to improve sample selection by methods that can best yield diverse mAbs of interest.  
253 Furthermore, RBD-specific memory B cells were mainly sorted after removing dead cells, this process  
254 increased the efficiency of BCR cloning.

255 Such optimized screening system allowed us to efficiently generate a panel of neutralizing Abs with  
256 relatively great potency. When we analyzed the distribution of gene clusters of B cell receptor (BCR)  
257 repertoire of abundant potential neutralizing and non-neutralizing antibody sequences, a few interesting  
258 observations were found. Our results revealed that potential neutralizing Abs tended to be distributed in  
259 several gene clusters, such as VH3-66 and VH3-53 allele, etc., among which, the VH3-66 has exclusively  
260 produced neutralizing Abs. This result may be helpful in analyzing the preference distribution of  
261 neutralizing Abs in the future. Meanwhile, CDRH3 length is reported as a key factor to value the diversity  
262 of RBD specific Abs, due to the changeable amino acid composition. We found that the CDRH3 length  
263 of potential neutralizing Abs showed a skewed distribution, with an inclined length of 11-16 amino acids.  
264 It suggested that the SARS-CoV-2 antibodies were likely derived from memory B cells during the  
265 primary response to SARS-CoV-2 infection but not a recall response to SARS-CoV or MERS, even  
266 though our collected blood specimens were cross-reactive with both SARS-CoV and MERS S protein<sup>32</sup>.  
267 One additional improvement that can be integrated into our screening system is single-cell sequencing.  
268 The development of proper algorithms for neutralization evaluation with incorporation of heavy chain  
269 variable region preferences, for example, IGHV3-66, could help to precisely predict neutralizing  
270 antibody from thousands of antigen specific mAbs repertoire<sup>17,21</sup>. This might further provide desired  
271 candidates of neutralizing Abs with potential therapeutic value, with better time-efficiency and  
272 economical preferences.

273 In conclusion, we have successfully established a strategically optimized screening system of  
274 neutralizing antibodies that can generate ideal numbers of neutralizing Abs in a total period of 15 days.  
275 This methodology can open the way for the potential on-time therapeutic applications towards various  
276 emerging pathogens in the future.

## 277 **Materials and Methods**

278 **Isolation of single RBD-specific memory B cells by FACS.** PBMCs from the convalescent patients  
279 were thawed and rested overnight. The mixed samples staining as following. 2 µg/ml RBD-his in 200 µl  
280 PBS (added with 2% FBS) was mixed with the specific antibody cocktail required for staining B cell.  
281 Then these PBMCs was incubated with mixed antibodies cocktail at 4 °C for 30 min (the antibodies  
282 cocktail including FITC-anti-human CD19 antibody (Biolegend, clone: SJ25C1), BV421-anti-human  
283 IgD antibody (Biolegend, clone: IA6-2), PerCP-Cy5.5-anti-human IgG antibody (Biolegend, clone:  
284 M1310G05), APC-anti-his tag antibody (Biolegend, clone: J095G46)). Dead dye (LIVE/DEAD™  
285 Fixable Near-IR Dead Cell Stain Kit, Thermo Fisher) was added at 4 °C for 20 min. After washing the  
286 cells, the FACS analysis were performed by BD FACSAriaIII (BD Biosciences) with FSC-A versus SSC-  
287 A identifying cell population, FSC-A versus FSC-H excluding doublets. Then FSC-H versus Dead Dye  
288 was gated to remove dead cells. RBD-specific single memory B cells were gated by CD19<sup>+</sup>IgD<sup>-</sup>IgG<sup>+</sup>His<sup>+</sup>,  
289 and single-cell sorted into 96-well PCR plates (free of DNase and RNase, Bio-Rad). The Plates were  
290 stored at -80 °C until BCR Cloning. Data analysis was performed utilizing the FlowJo software (FlowJo,  
291 LLC).

292 **Amplification of single-cell BCR variable region.** Our primers for PCR were designed from leader  
293 sequences and J region sequence of immunoglobulin (Ig) annotated by the IMGT reference directory  
294 (<http://www.imgt.org/vquest/refseqh.html>). An adaptor sequence was added to the 5' end of the leader  
295 primers for the 2<sup>nd</sup> PCR. 31 leader primers (AP\_G\_leader Mix) was designed for the heavy chain of Ig,  
296 and 19 leader primers (AP\_K\_leader Mix) was used in the amplification of the kappa chain of Ig, and 21  
297 leader primers (AP\_L\_leader Mix) for the lambda chain of Ig were designed. For the initial step of RT-  
298 PCR, 5 µl of the RT\_Mix\_A was added into each well of 96 well plate containing a single B cell. Then  
299 the mixture was incubated at 65°C for 5 min and put on ice immediately for 3 min. 5 µl RT\_Mix\_B was  
300 added into each well of the plate with reaction program: 45 °C for 45 min, 70 °C for 15 min. 1 µl of RT  
301 product was moved to the well of a new 96 well plate containing 9 µl 1st\_PCR\_Mix\_Gamma  
302 /Kappa/Lamda, respectively. The PCR program for 1st PCR: 95°C for 3 min, 30 cycles of 95°C for 10  
303 sec, 55°C for 5 sec and 72°C for 1 min. 1 µl of the tenfold-diluted 1st PCR product was then added into  
304 each well of a new 96 well plate holding 9 µl 2<sup>nd</sup> PCR\_Mix\_Gamma/Kappa/Lamda, respectively. The  
305 PCR program for 2<sup>nd</sup> PCR: 95°C for 3 min, 35 cycles of 95°C for 10 sec, 55°C for 5 sec, and 72°C for 45  
306 sec. The second PCR products were further cloned into the antibody linear expression cassettes or  
307 expression vectors to express full IgG1 antibodies. PCR reaction Mix are prepared as described in Table

308 S3. All of the PCR primers are listed in Table S4 and prepared in Table S5.

309 **Generation of linear antibody expression cassettes and expression of Abs.** 2<sup>nd</sup> PCR products were  
310 used to ligate with the expression cassettes directly by overlapping PCR. The products were purified with  
311 ethanol precipitation method. Briefly, 120  $\mu$ l of absolute ethanol and 6  $\mu$ l of 3 M sodium acetate were  
312 mixed with 60  $\mu$ l of the Overlap PCR product. Then the reagents were incubated at -80 °C for 30 minutes.  
313 After centrifuging at 10,000 rpm for 20 minutes, the supernatant was discarded and the pellet adhered  
314 on the tube were rinsed with 200  $\mu$ l 70% ethanol and absolute ethanol and evaporated the ethanol at 56°C  
315 for 10 min. 40  $\mu$ l sterile water was added to dissolve the DNA pellet. After measuring the nucleic acid  
316 concentration, purified overlapping PCR products of paired heavy and light chain expression cassettes  
317 were co-transfected in HEK293T cells. The binding ability of transfected culture supernatants to SARS-  
318 CoV-2 S-RBD was tested by ELISA after 48 hours.

319 **Recombinant antibody production and purification.** For the construction of antibody expression  
320 Vectors, VH and VL 2<sup>nd</sup> PCR products were inserted separately into the linearized plasmids (pcDNA3.4)  
321 that encode constant regions of the heavy chains and light chains via a homologous recombination kit  
322 (Catalog No. C112, Vazyme). A pair of plasmids separately expressing heavy and light chain of  
323 antibodies were transiently co-transfected into Expi293<sup>TM</sup> cells (Catalog No. A14528, ThermoFisher)  
324 with ExpiFectamine<sup>TM</sup> 293 Reagent. Then the cells were cultured in shaker incubator at 120 rpm and 8%  
325 CO<sub>2</sub> at 37 °C. After 7 days, the supernatants with the secretion of antibodies were collected and captured  
326 by protein G Sepharose (GE Healthcare). The bound antibodies on the Sepharose were eluted and  
327 dialyzed into phosphate-buffered saline (PBS). The purified antibodies were used in following binding  
328 and neutralization analyses.

329 **ELISA binding assay and competitive ELISA.** 2  $\mu$ g/ml the recombinant S or RBD proteins derived  
330 from SARS-CoV-2, SARS-CoV, or MERS-CoV (Sino Biological, Beijing) were coated on 384-well  
331 plates (Corning) at 4°C overnight. Plates were blocked with blocking buffer (PBS containing 5% FBS  
332 and 2% BSA) at 37°C for 1 hour. Serially diluted convalescents' plasma or mAbs were added into the  
333 plates and incubated at 37°C for 30 min. Plates were washed with phosphate-buffered saline, 0.05%  
334 Tween-20 (PBST) and ALP-conjugated goat anti-human IgG (H+L) antibody (Thermo Fisher) was added  
335 into each well and incubated at 37°C for 1 hour. Lastly, the PNPP substrate was added, and absorbance  
336 was measured at 405 nm by a microplate reader (Thermo Fisher). For a competitive ELISA to test the  
337 effect of mAbs on blocking ACE2 binding RBD, 2  $\mu$ g/ml the recombinant ACE2 (Sino Biological,

338 Beijing) was added in 384-well plates and overnight at 4°C, followed by blocking with the blocking  
339 buffer and washing. 500 ng/ml RBD-mouse-Ig-Fc was pre-incubated with test specimen at 37°C for 1  
340 hour, followed by adding into the wells coated with ACE2 and incubated at 37°C for 1 hour. Unbound  
341 antigen were removed with washes. Then ALP-conjugated anti-mouse-Ig-Fc antibody was added into  
342 the wells and incubated at 37°C for 30 min. PNPP was added and measured as above.

343 **Pseudovirus neutralization assay.** Pseudovirus was generated as previously described<sup>37,38</sup>. HEK293T  
344 cells were transfected with psPAX2, pWPXL Luciferase, and pMD2.G plasmid encoding either SARS-  
345 CoV-2 S. The supernatants were harvested 48 hours later, filtered by 0.45 µm filter and centrifugated at  
346 300 g for 10 min to collect the supernatant and then aliquoted and stored at -80°C. The purified  
347 antibodies with serial dilution were incubated with pseudovirus at 37°C for 1 hour. The mixture of viruses  
348 and specimens was then added in a hACE2 expressing cell line (hACE2-293T cell). After 48 hours  
349 culture, the luciferase activity of infected hACE2/293T cells was measured by the Bright-Luciferase  
350 Reporter Assay System (Promega). Relative luminescence units (RLU) of Luc activity was detected  
351 using ThermoFisher LUX reader. All experiments were performed at least three times and expressed as  
352 means ± standard deviations (SDs). Half-maximal inhibitory concentrations (IC<sub>50</sub>) were calculated using  
353 the four-parameter logistic regression in GraphPad Prism 8.0.

354 **Authentic SARS-CoV-2 virus neutralization assays.** An authentic SARS-CoV-2 neutralization assay  
355 was performed in a biosafety level 3 laboratory of Fudan University. Serially diluted mAbs were  
356 incubated with authentic SARS-CoV-2 (nCoV-SH01, GenBank: MT121215.1, 100 TCID<sub>50</sub>) at 37°C for  
357 1 hour. After incubation, the mixtures were then transferred into 96-well plates, which were seeded with  
358 Vero E6 cells. After incubation at 37°C for 48 hours, each well was examined for CPE and supernatant  
359 viral RNA by RT-qPCR. For RT-qPCR, the viral RNA was extracted from the collected supernatant using  
360 Trizol LS (Invitrogen) and used as templates for RT-qPCR analysis by Verso 1-step RT-qPCR Kit  
361 (Thermo Scientific) following the manufacturer's instructions. PCR primers targeting SARS-CoV-2 N  
362 gene (nt608-706) were as followed (forward/reverse): 5'-GGGGAAGTCTCTCTGCTAGAAT-3'/5'-  
363 CAGACATTTTGCTCTCAAGCTG-3'. qRT-PCR was performed using the LightCycler 480 II PCR  
364 System (Roche) with program as followed: 50°C 15 min; 95°C 15 min; 40 cycles of 95°C 15 sec, 50°C  
365 30 sec, 72°C 30 sec.

366 **Antibody binding affinity measurement by SPR.** The affinity of antibody binding SARS-Cov-2-S-  
367 RBD was measured via the Biacore X100 platform. The CM5 chip (GE Healthcare) was coupled with

368 an anti-human IgG-Fc antibody to capture 9000 response units antibodies. Gradient concentrations of  
369 SARS-Cov-2-S-RBD (Sino Biological Inc.) were diluted (2-fold dilution, from 50 nM to 0.78 nM) with  
370 HBS-EP<sup>+</sup> Buffer (0.01 M HEPES, 0.15 M NaCl, 0.003 M EDTA and 0.05% (v/v) Surfactant P20, pH  
371 7.4), then injected into the human IgG capturing chip. The sensor surface was regenerated with 3 M  
372 magnesium chloride at the end of each cycle. The affinity was calculated using a 1:1 binding fit model  
373 in Biacore X100 Evaluation software (Version:2.0.2).

374 **Sequence analysis of antigen-specific mAb sequences.** IMGT/V-QUEST ([http://www.imgt.org/](http://www.imgt.org/IMGT_vquest/vquest)  
375 [IMGT\\_vquest /vquest](http://www.imgt.org/IMGT_vquest/vquest)) and IgBLAST (<https://www.ncbi.nlm.nih.gov/igblast/>), MIXCR ([https://mixcr.r](https://mixcr.readthedocs.io/en/master/)  
376 [eadthedocs.io/en/master/](https://mixcr.readthedocs.io/en/master/)) and VDJtools (<https://vdjtools-doc.readthedocs.io/en/master/overlap.html>)  
377 tools were used to do the VDJ analysis and annotation, germline divergence for each antibody clone. The  
378 Phylogeny tree analysis of IgG heavy and light chain variable genes was performed with MegaX  
379 (Molecular Evolutionary Genetics Analysis across computing platforms) by the Maximum Likelihood  
380 method. Abs DNA sequences were compared with each other by ClustalW (pairwise alignments) to  
381 analyze sequence similarity, and EvolView (<https://www.evolgenius.info/evolview/>) was used for the  
382 decoration of Phylogeny tree. R packages (ggplot2, pheatmap) were used for the bar chart, heatmap and  
383 Cicos plot.

384 **Ethics Statement.** The project “The application of antibody tests patients infected with SARS-CoV-2”  
385 was approved by the ethics committee of ChongQing Medical University. Informed consents were  
386 obtained from all participants.

387 **Acknowledgments:** We acknowledge the work and contribution of blood sample providers from  
388 Chongqing Medical University affiliated Yongchuan Hospital and the third affiliated Hospital of  
389 Chongqing Medical University. We also thank health donors from Chongqing Medical University. This  
390 study was supported by Chongqing Medical University fund (X4457) with the donation from Mr Yuling  
391 Feng.

#### 392 **Author contributions**

393 AJ, AH conceived and designed the study, KD, CH, LD, YN offered help on collection of convalescent  
394 patient blood samples. Most of the experiments were completed by XH,TL, CH, YW, JW, RW, FG, JH,  
395 SM, YL, FL, SS, YH, QC, LL with the assistance from TN, YX, CG, HJ, YW, WX, XC, QG, GZ, CH,  
396 WK. SL, MS, YW, XH, AJ played an import role in data analysis of neutralizing Abs sequences. SL,

397 MS, YW, JW performed to generated figures and tables and take responsibility for the integrity and  
398 accuracy of data presentation. AJ, XH wrote the manuscript and SL, TL, JW and YW helped to revise it.

399 **Data availability statements** All information presented in this study will be upload soon.

400 **Conflict of interests:** We declare no competing financial interest.

401

402

403 **Figure legends**

404 **Figure 1. Schematic model depicting a rapid and efficient screening system of neutralizing Abs.**

405 Rapid neutralizing antibody screening workflows and timelines are shown, representing the multiple  
406 workflows conducted in parallel. PBMC were isolated from collected convalescent patients' blood, and  
407 the RBD-specific memory B cells in the PBMCs were sorted as single-cell via flow-cytometric sorter  
408 (day 1). Then, the IgG heavy and light chains of monoclonal antibody genes were amplified by RT-PCR  
409 on the same day. 2<sup>nd</sup> PCR products were cloned into linear expression cassettes on the second day.  
410 Antibodies were expressed by transient transfection with equal amounts of paired heavy and light chain  
411 linear expression cassettes in HEK293T cells and culture for two days. The cell supernatants in  
412 HEK293T cells were detected for the specificity of antibodies by ELISA in 384-well plates on the fourth  
413 day. The neutralizing activity of antibodies was detected with pseudovirus bearing SARS-CoV-2 S in  
414 96-well plates on the sixth day. The potential neutralization antibody expression plasmids were  
415 transfected into Exi293F cells for large-scale production of Ab proteins. The cell supernatants in Exi293F  
416 cells were collected, and antibody proteins were purified by protein G. They were further measured for  
417 the binding ability and neutralizing activity via ELISA and competitive ELISA *in vitro*. Additionally,  
418 virus neutralization assay was performed. Created with Biorender.com.

419

420 **Figure 2. Isolation of RBD-specific memory B cells using flow cytometry. A.** The heatmap depicts

421 the specificity of convalescent patients' plasma against S1 and RBD from SARS-CoV-2, SARS-CoV  
422 and MERS-CoV, measured by ELISA. Serial dilutions of plasma samples were performed to test the  
423 reactivity of antibodies in plasma. The plasma of healthy donors was used as the control. Data were  
424 shown with the mean of representative experiments. **B.** Gating strategy for SARS-CoV-2 RBD-specific  
425 IgG<sup>+</sup> B cells in PBMCs of the convalescent patients. Living CD19<sup>+</sup> IgD<sup>-</sup>IgG<sup>+</sup> cells were gated, and cells  
426 with positive SARS-CoV-2 RBD staining were selected for single-cell sorting. **C.** FACS analysis of  
427 RBD-specific memory B cells in CD19<sup>+</sup>IgD<sup>-</sup>IgG<sup>+</sup> memory B cells from PBMCs of three batch  
428 convalescent patients. Plots show CD19<sup>+</sup>IgD<sup>-</sup>IgG<sup>+</sup>RBD<sup>+</sup> populations using gating strategy described in  
429 **B.**

430

431 **Figure 3. Identification of RBD specific monoclonal antibodies from convalescent COVID-19**

432 **patients. A.** Screening of specific Abs against SARS-CoV-2 S1 and RBD. The heatmap reveals that the



433 binding ability of 198 Ab supernatants produced by HEK239T cells transfected with linear Ab gene  
434 expression cassette. The mAbs rank as the screening sequence, and binding activity of mAbs against  
435 SARS-CoV-2 S1 and RBD were tested by ELISA. The brightness of blue represents the binding strength,  
436 which reflected the OD<sub>405 nm</sub> value tested by ELISA. The neutralizing activity of mAbs was discriminated  
437 according to the neutralizing value. Antibody-mediated blocking of luciferase-encoding SARS-CoV-2  
438 typed pseudovirus transfected into hACE2/ HEK293T cells were measured by values of relative light  
439 units (RUL) . The Green columns indicate potential neutralization (neutralizing activity >75%), while  
440 white indicate partial or not neutralization (neutralizing activity <75%). **B.** Frequencies of variable region  
441 of heavy chain (VH) gene clusters for potential neutralizing and non-neutralizing antibodies. Clonal  
442 sequences groups were collapsed and treated as one sample for calculation of the frequencies. **C.**  
443 Frequency of various the heavy chain complementarity determining region 3 (CDRH3) length of in  
444 potential neutralizing and non-neutralizing antibodies.

445

446 **Figure 4. The binding activity and inhibition of ACE2-RBD interaction of mAbs tested by ELISA**  
447 **and competitive ELISA. A.** The OD<sub>405 nm</sub> value reflects a binding strength of purified mAbs to 1 µg/ml  
448 SARS-CoV-2 S1 or RBD. Plates were coated with recombinant S1 or RBD protein of SARS-CoV-2,  
449 then incubated with purified mAbs. A SARS specific mAb (CR3022) was set as the positive control. The  
450 blue dashed lines indicated the OD<sub>405nm</sub> value of a negative sample. **B.** The inhibitory effect of purified  
451 mAbs against the interaction between SARS-CoV-2 RBD and hACE2 was tested via competitive ELISA  
452 analysis. Blocking efficacy was determined by comparing response units with and without prior antibody  
453 incubation. The green dashed lines indicated 50% inhibition on blocking the interaction ACE2 and RBD  
454 interaction.

455

456 **Figure 5. Functional characteristics of neutralizing Abs against SARS-CoV-2. A.** Neutralization  
457 activity of mAbs against authentic SARS-CoV-2 virus (nCoV-SH01) were analyzed by Cytopathic  
458 effects (CPE) test. Serial dilutions of mAbs were tested in parallel against authentic SARS-CoV-2,  
459 ranging from 18.76 µg/ml to 0.14 µg/ml. CPE results was summarized in (A) where "++++" indicates  
460 100% cytopathy, "+++" indicates 50-75%, "++" indicates 25-50%, "+" indicates <25% and "-" indicates  
461 no cytopathy. 13G9 was marked "\*", which was obtained by the method previously described<sup>23</sup>. **B.** The  
462 neutralization activity of 58G6 and 510A5 against the authentic SARS-CoV-2 virus was determined in

463 Vero-E6 cells by RT-qPCR. Dashed lines indicated a 50% reduction in viral infectivity. Data were shown  
464 as mean  $\pm$  SD of representative experiments. **C.** Binding kinetics of isolated mAbs with SARS-CoV-2  
465 RBD were measured by Surface Plasmon Resonance (SPR). The purified antibody was captured onto  
466 the CM5 sensor chip, followed by the injection of soluble SARS-CoV-2 RBD at five different  
467 concentrations. The experimental data of 58G6 and 510A5 were shown in the top and bottom figures in  
468 **C** respectively. The results presented are representatives of two independent experiments.

469

470 **Figure S1. The optimization of the screening platform.** **A.** The conventional screening of neutralizing  
471 antibodies. Antigen-specific B cells from PBMCs were sorted on day 1. The single-cell BCR genes were  
472 amplified by PCR on day 2. The antibody expression vectors were constructed in the next three days,  
473 including the PCR product sequencing, the primer synthesis, the ligation of genes and vectors, the DNA  
474 transformation and the plasmid extraction. The purified plasmids were transfected into HEK293T cells  
475 on day 5. After 48 hours, the cell supernatants were collected and analyzed with specific antigens by  
476 ELISA. Specific antibodies are used for following antibody expression and purification. Purified  
477 antibodies were screened as neutralizing candidates. **B.** The key parameters affecting screening  
478 efficiency. The following steps of the screening processes were carefully modified: multi-step sorting  
479 for the individual samples or the pooled samples, labeling S or S-RBD specific B cells, expressing  
480 antibodies using linear expression cassettes or plasmids, and designing preferred primers for the single-  
481 cell BCR cloning. To reduce time-consuming and workload, it is the critical step to screen neutralizing  
482 antibodies during the initial screening in the sixty days. Two methods for neutralization evaluation,  
483 competitive ELISA method in 3 hours or pseudovirus assay for 48 hours, were used side by side for  
484 confirmation of nAb neutralizing capability. **C.** The optimized strategy of neutralizing antibodies  
485 development. One day after PBMC thawing, specific B cell sorting was performed on day 1. A single  
486 BCR gene was cloned on day 2, using the 2<sup>nd</sup> PCR product to construct the linear expression cassettes,  
487 which were termed as the transfection targets to be introduced directly into HEK293T cells with liposome,  
488 without constructing plasmid, to shorten the screening duration. After 48 hours, the supernatants of each  
489 transfected samples were harvested and analyzed via ELISA and pseudovirus neutralization assay for  
490 evaluating specificity and neutralization.

491

492 **Figure S2. The influence of dead cells on the sorting of RBD-specific memory B cells.** Gating strategy  
493 to remove dead cells: SSC-A versus FSC-A selected cell populations, then FSC-A versus FSC-H  
494 excluded doublets and FSC-H versus Dead Dye removed dead cells. Memory B cells were gated by  
495 CD19<sup>+</sup>IgD<sup>+</sup>IgG<sup>+</sup> Cells (A), without removing dead cells in the gating strategy (B).

496

497 **Figure S3. Schematic diagram of BCR RT-PCR and linear expression cassettes construction. A.**  
498 Schema depicting workflow of the constructed linear expression cassettes. PCR amplified the variable  
499 region genes in single B cells. The BCR cDNAs was obtained from RBD-specific memory B cell by RT-  
500 PCR and the linear expression cassettes were amplified via three rounds of PCR. A primary PCR utilized  
501 gene-specific primers at both the 5' and 3' ends. The 5' oligonucleotides bound the leader sequence (L).  
502 The 3' reverse primer was connected with heavy or light constant regions. In the secondary PCR, a 5'  
503 forward primer annealed to an "adapter", which was encoded at the 5' end of the first PCR product,  
504 were used in combination with a 3' reverse primer annealing to the J gene of Ab variable region. The  
505 secondary oligonucleotides provided 20 base-pair overlap regions: at the 5' end with human  
506 cytomegalovirus (CMV) promoter fragment, and at the 3' end with a heavy or light chain constant region  
507 fragment containing a polyadenylation sequence. Then, in a tertiary PCR, the DNAs of variable region,  
508 the CMV promoter fragment, and the constant region fragments were combined and amplified to produce  
509 two separate linear expression cassettes. **B.** The amplified products from BCR cDNAs were  
510 electrophoresed and stained with ethidium bromide. **(a)** Agarose gel of variable region BCR genes. Lane  
511 "M", 2 kb DNA ladder, Lane 1-24, heavy chain variable region and Lane 25-48, light chain variable  
512 region. **(b)** Agarose gel of linear expression cassettes. Lane "M", 5 kb DNA ladder, Lane 1-24, the linear  
513 expression cassettes of heavy chains and Lane 25-48, the linear expression cassettes of light chains.

514

515 **Figure S4. Usage and pairing of heavy and light chains for all specific antibodies. A.** Frequencies of  
516 variable light chain gene (VL) clusters for neutralizing (activity > 75%) and potential non-neutralizing  
517 (activity < 75%) antibodies. V gene segments were ranked by frequencies of neutralizing Abs. **B.**  
518 Frequencies of various CDRL3 length of potential neutralizing and non-neutralizing antibodies. **C.**  
519 Clonal expanded heavy and light clusters were paired and highlighted in different colors.

520

521 **Figure S5. Phylogenetic analysis of VH (up) and VL (down) genes for RBD-binding antibodies.**

522 Clonal expanded VH and VL clusters were paired and highlighted in various colors. The red stars

523 represented individual neutralizing antibodies. Branch lengths were drawn to scale so that sequence

524 relatedness could be readily assessed.

525 **References**

- 526 1. de Wit, E., van Doremalen, N., Falzarano, D. & Munster, V.J. SARS and MERS: recent insights  
527 into emerging coronaviruses. *Nature Reviews Microbiology* 14, 523-534 (2016).
- 528 2. Cummings, M.J., et al. Epidemiology, clinical course, and outcomes of critically ill adults with  
529 COVID-19 in New York City: a prospective cohort study. *The Lancet* 395, 1763-1770 (2020).
- 530 3. Chen, N., et al. Epidemiological and clinical characteristics of 99 cases of 2019 novel  
531 coronavirus pneumonia in Wuhan, China: a descriptive study. *Lancet (London, England)* 395,  
532 507-513 (2020).
- 533 4. Wang, C., Horby, P.W., Hayden, F.G. & Gao, G.F. A novel coronavirus outbreak of global health  
534 concern. *The Lancet* 395, 470-473 (2020).
- 535 5. Mair-Jenkins, J., et al. The effectiveness of convalescent plasma and hyperimmune  
536 immunoglobulin for the treatment of severe acute respiratory infections of viral etiology: a  
537 systematic review and exploratory meta-analysis. *The Journal of infectious diseases* 211, 80-90  
538 (2015).
- 539 6. Ko, J.H., et al. Challenges of convalescent plasma infusion therapy in Middle East respiratory  
540 coronavirus infection: a single centre experience. *Antiviral therapy* 23, 617-622 (2018).
- 541 7. Iwasaki, A. & Yang, Y. The potential danger of suboptimal antibody responses in COVID-19.  
542 *Nature Reviews Immunology* 20, 339-341 (2020).
- 543 8. Walls, A.C., et al. Structure, Function, and Antigenicity of the SARS-CoV-2 Spike Glycoprotein.  
544 *Cell* 181, 281-292.e286 (2020).
- 545 9. Hoffmann, M., et al. SARS-CoV-2 Cell Entry Depends on ACE2 and TMPRSS2 and Is Blocked  
546 by a Clinically Proven Protease Inhibitor. *Cell* 181, 271-280.e278 (2020).
- 547 10. Wu, Y., et al. A noncompeting pair of human neutralizing antibodies block COVID-19 virus  
548 binding to its receptor ACE2. *Science* 368, 1274-1278 (2020).
- 549 11. Hansen, J., et al. Studies in humanized mice and convalescent humans yield a SARS-CoV-2  
550 antibody cocktail. *Science* (2020).
- 551 12. Chi, X., et al. A neutralizing human antibody binds to the N-terminal domain of the Spike  
552 protein of SARS-CoV-2. *Science* 369, 650-655 (2020).
- 553 13. Brouwer, P.J.M., et al. Potent neutralizing antibodies from COVID-19 patients define multiple  
554 targets of vulnerability. *Science* 369, 643-650 (2020).
- 555 14. Zost, S.J., et al. Potently neutralizing and protective human antibodies against SARS-CoV-2.  
556 *Nature* (2020).
- 557 15. Shi, R., et al. A human neutralizing antibody targets the receptor-binding site of SARS-CoV-2.  
558 *Nature* 584, 120-124 (2020).
- 559 16. Pinto, D., et al. Cross-neutralization of SARS-CoV-2 by a human monoclonal SARS-CoV  
560 antibody. *Nature* 583, 290-295 (2020).
- 561 17. Liu, L., et al. Potent neutralizing antibodies against multiple epitopes on SARS-CoV-2 spike.  
562 *Nature* (2020).
- 563 18. Ju, B., et al. Human neutralizing antibodies elicited by SARS-CoV-2 infection. *Nature* 584, 115-  
564 119 (2020).
- 565 19. Zost, S.J., et al. Rapid isolation and profiling of a diverse panel of human monoclonal antibodies  
566 targeting the SARS-CoV-2 spike protein. *Nat Med* (2020).
- 567 20. Wang, C., et al. A human monoclonal antibody blocking SARS-CoV-2 infection. *Nat Commun*  
568 11, 2251 (2020).

- 569 21. Cao, Y., et al. Potent Neutralizing Antibodies against SARS-CoV-2 Identified by High-  
570 Throughput Single-Cell Sequencing of Convalescent Patients' B Cells. *Cell* 182, 73-84 e16  
571 (2020).
- 572 22. Baum, A., et al. Antibody cocktail to SARS-CoV-2 spike protein prevents rapid mutational  
573 escape seen with individual antibodies. eabd0831 (2020).
- 574 23. Jin, A., et al. A rapid and efficient single-cell manipulation method for screening antigen-  
575 specific antibody-secreting cells from human peripheral blood. *Nat Med* 15, 1088-1092 (2009).
- 576 24. Akkaya, M., Kwak, K. & Pierce, S.K. B cell memory: building two walls of protection against  
577 pathogens. *Nature Reviews Immunology* 20, 229-238 (2020).
- 578 25. Phan, T.G. & Tangye, S.G. Memory B cells: total recall. *Current opinion in immunology* 45,  
579 132-140 (2017).
- 580 26. Tiller, T., et al. Efficient generation of monoclonal antibodies from single human B cells by  
581 single cell RT-PCR and expression vector cloning. *J Immunol Methods* 329, 112-124 (2008).
- 582 27. Smith, K., et al. Rapid generation of fully human monoclonal antibodies specific to a  
583 vaccinating antigen. *Nat Protoc* 4, 372-384 (2009).
- 584 28. Liao, H.X., et al. High-throughput isolation of immunoglobulin genes from single human B  
585 cells and expression as monoclonal antibodies. *J Virol Methods* 158, 171-179 (2009).
- 586 29. Long, Q.-X., et al. Antibody responses to SARS-CoV-2 in patients with COVID-19. *Nature*  
587 *Medicine* 26, 845-848 (2020).
- 588 30. Briney, B., Inderbitzin, A., Joyce, C. & Burton, D.R. Commonality despite exceptional diversity  
589 in the baseline human antibody repertoire. *Nature* 566, 393-397 (2019).
- 590 31. Wu, N.C., et al. In vitro evolution of an influenza broadly neutralizing antibody is modulated  
591 by hemagglutinin receptor specificity. *Nature Communications* 8, 15371 (2017).
- 592 32. Yu, L. & Guan, Y. Immunologic Basis for Long HCDR3s in Broadly Neutralizing Antibodies  
593 Against HIV-1. *Front Immunol* 5, 250 (2014).
- 594 33. Jiang, S., Hillyer, C. & Du, L. Neutralizing Antibodies against SARS-CoV-2 and Other Human  
595 Coronaviruses. *Trends in Immunology* 41, 355-359 (2020).
- 596 34. Kreer, C., et al. Longitudinal Isolation of Potent Near-Germline SARS-CoV-2-Neutralizing  
597 Antibodies from COVID-19 Patients. *Cell* (2020).
- 598 35. Tian, X., et al. Potent binding of 2019 novel coronavirus spike protein by a SARS coronavirus-  
599 specific human monoclonal antibody. *Emerg Microbes Infect* 9, 382-385 (2020).
- 600 36. Yan, R., et al. Structural basis for the recognition of SARS-CoV-2 by full-length human ACE2.  
601 *Science* 367, 1444-1448 (2020).
- 602 37. Ou, X., et al. Characterization of spike glycoprotein of SARS-CoV-2 on virus entry and its  
603 immune cross-reactivity with SARS-CoV. *Nature Communications* 11, 1620 (2020).
- 604 38. Nie, J., et al. Establishment and validation of a pseudovirus neutralization assay for SARS-CoV-  
605 2. *Emerging Microbes & Infections* 9, 680-686 (2020).

**Figure 1**

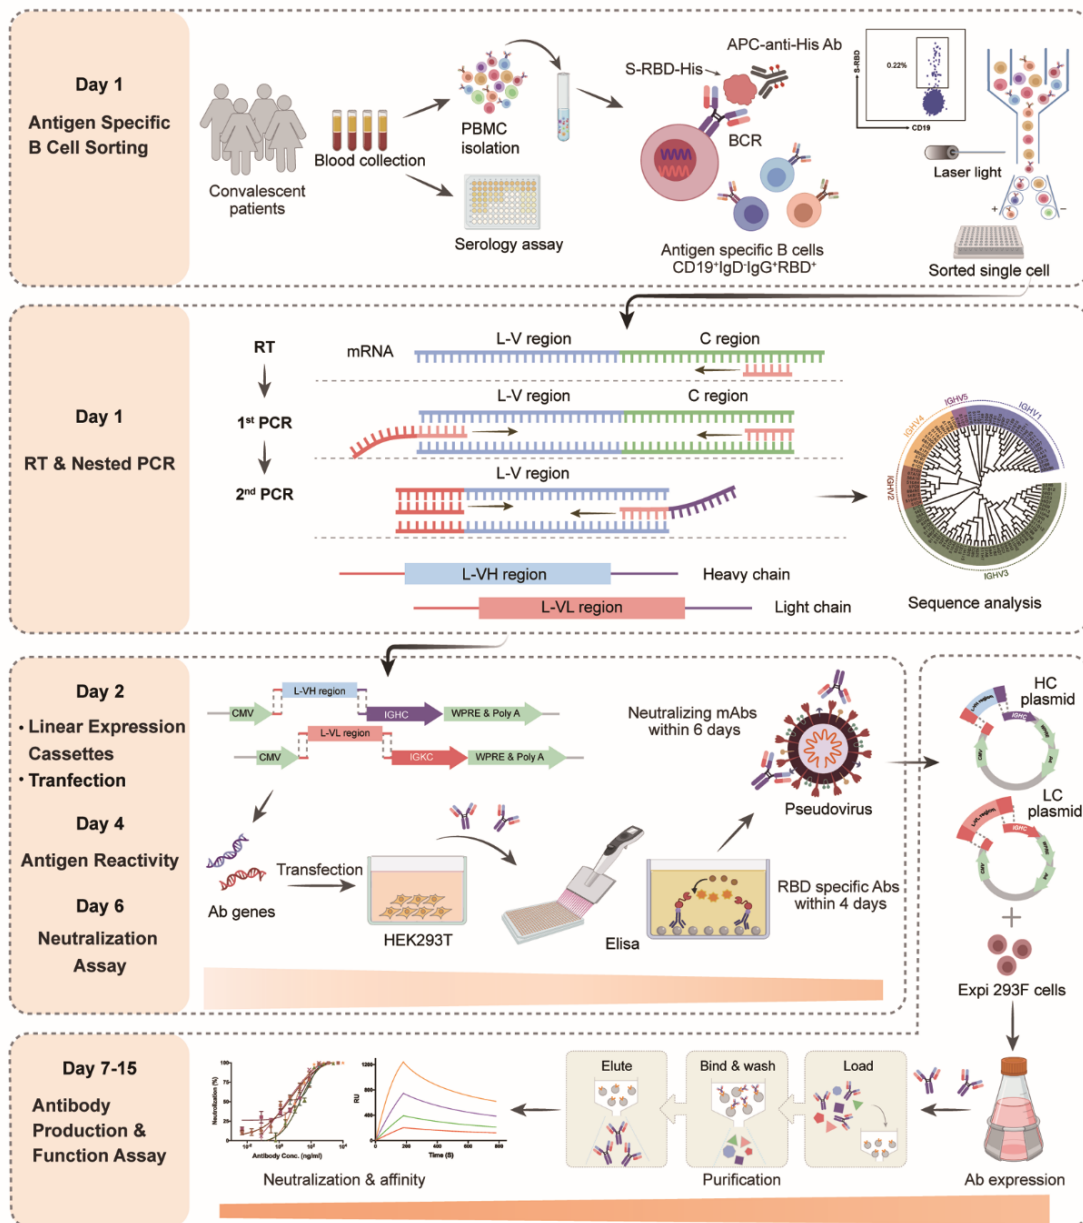

Figure 2

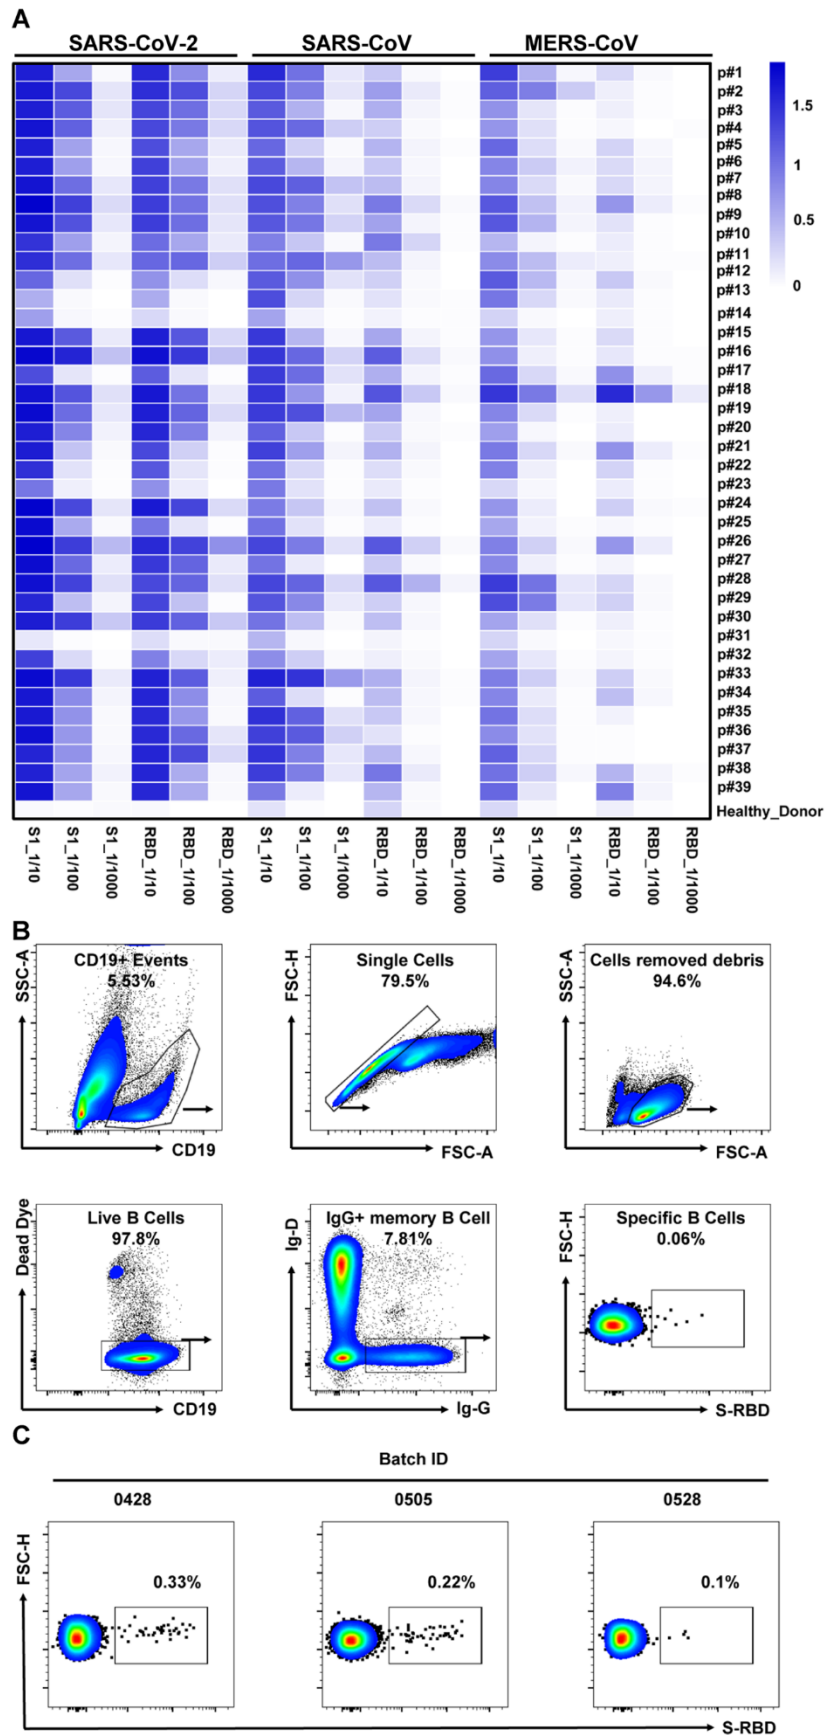



Figure 3

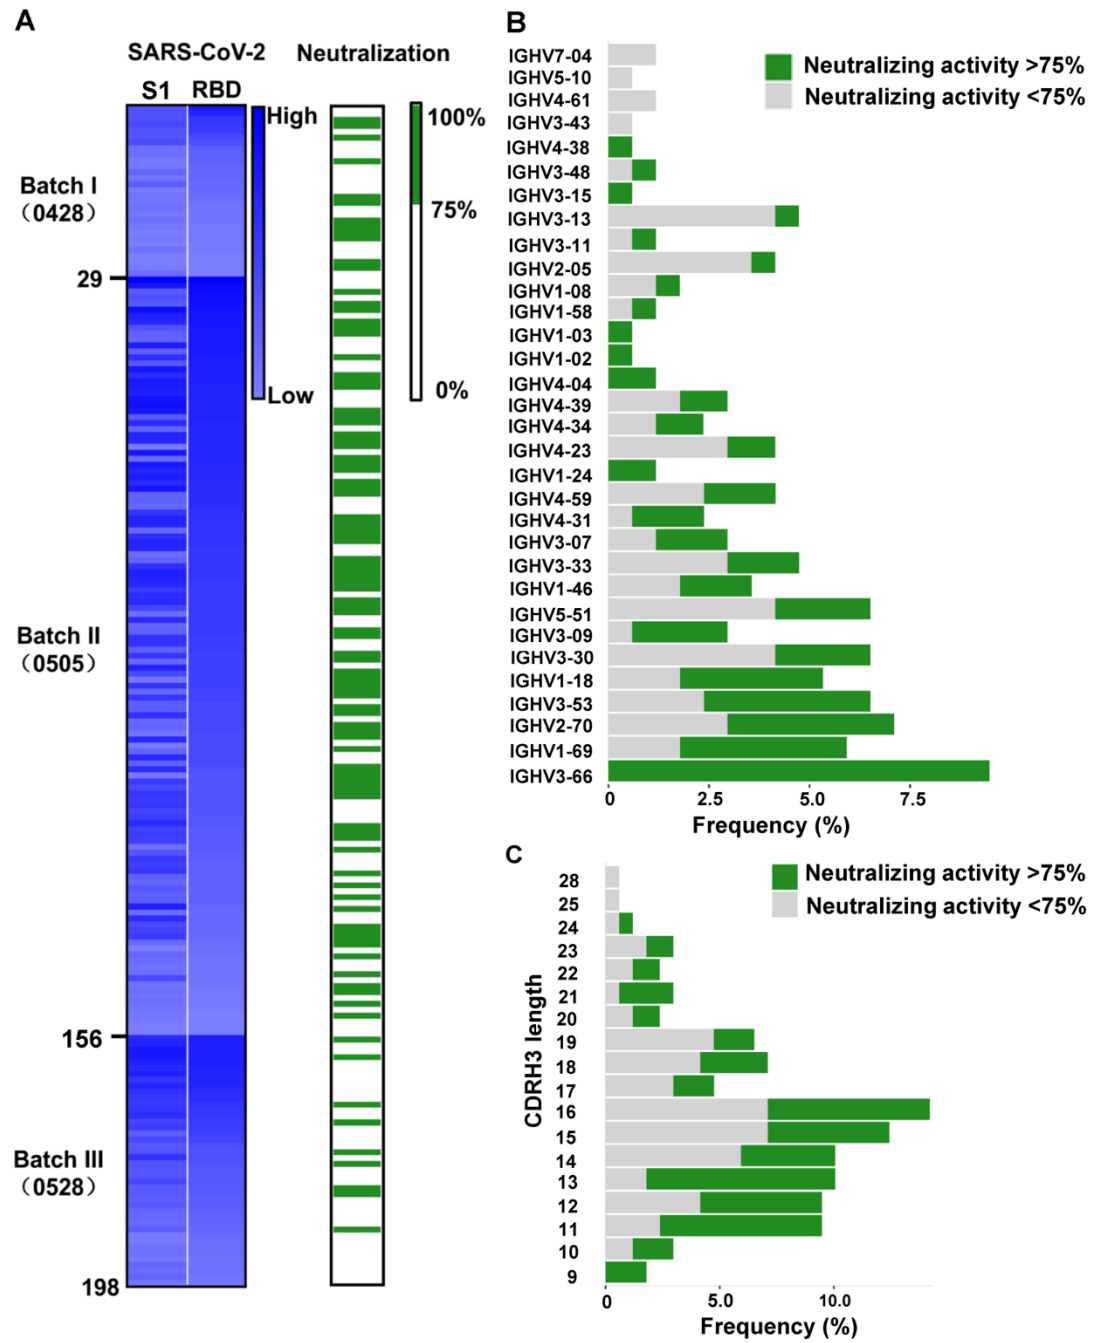

Figure 4

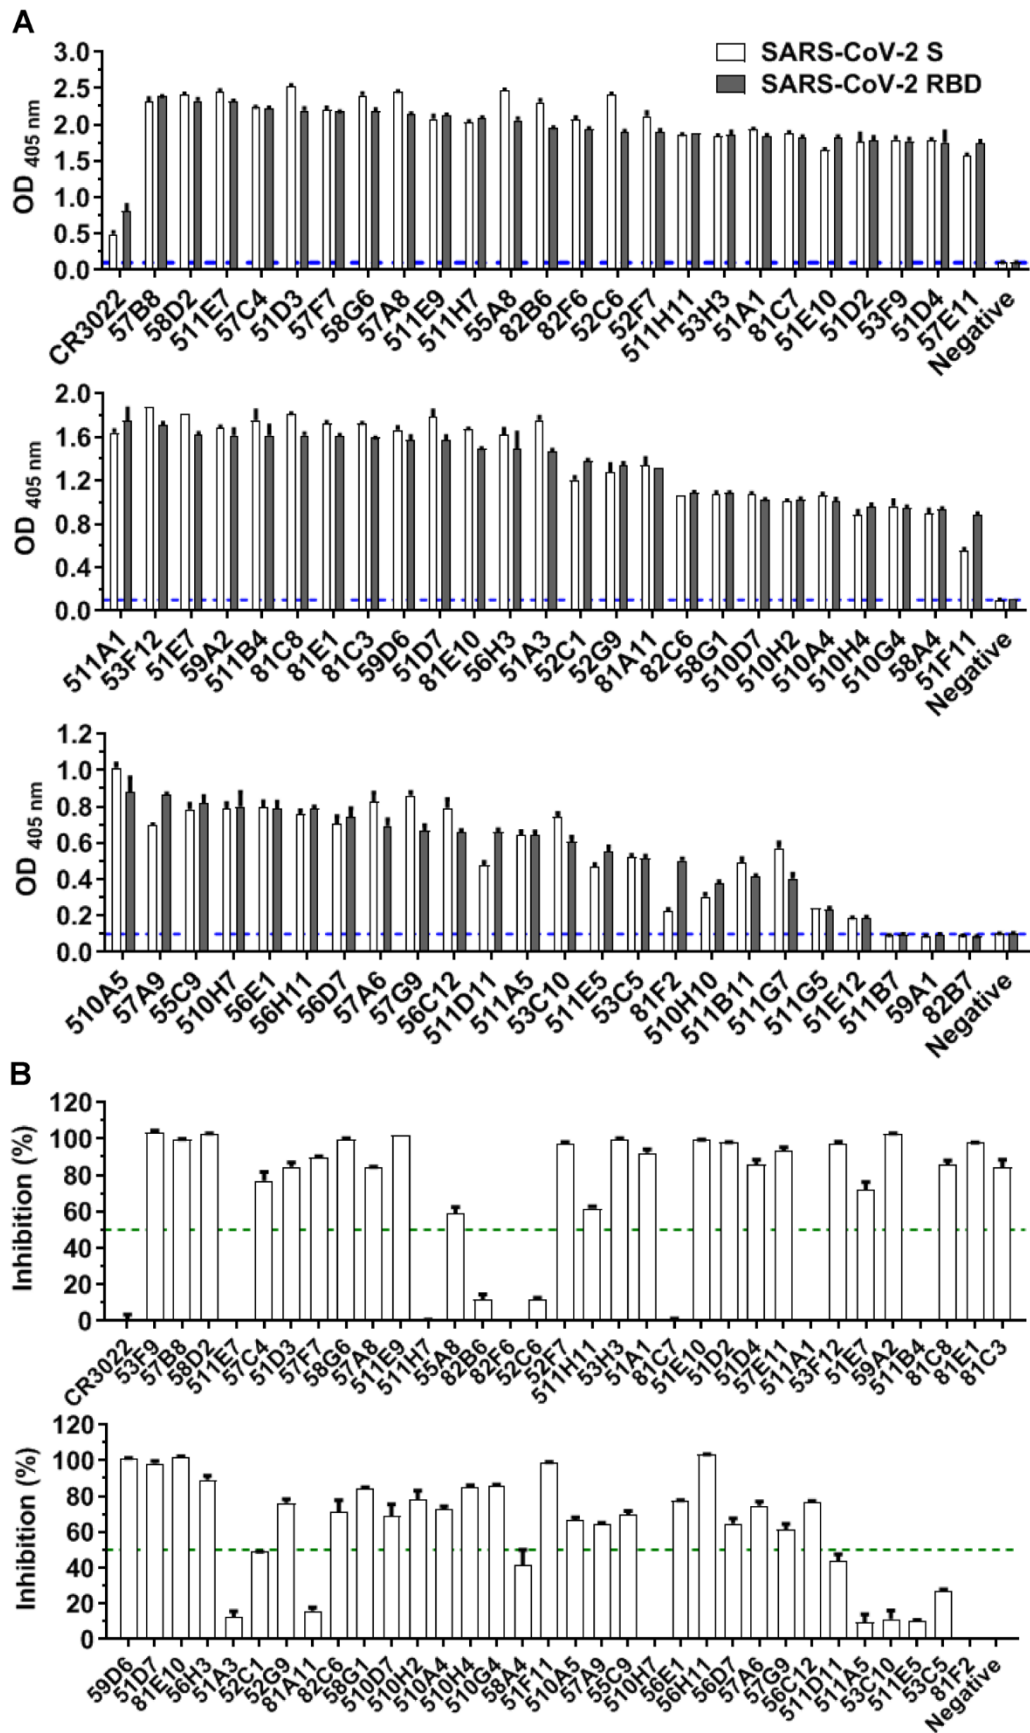

**Figure 5**

**A**

| Number | mAb   | Concentration (µg/ml) |      |      |      |      |      |      |      | Number | mAb   | Concentration (µg/ml) |      |      |      |      |      |      |      |
|--------|-------|-----------------------|------|------|------|------|------|------|------|--------|-------|-----------------------|------|------|------|------|------|------|------|
|        |       | 18.76                 | 9.38 | 4.69 | 2.35 | 1.17 | 0.59 | 0.29 | 0.14 |        |       | 18.76                 | 9.38 | 4.69 | 2.35 | 1.17 | 0.59 | 0.29 | 0.14 |
| 1      | 58G6  | -                     | -    | -    | -    | -    | -    | -    | -    | 25     | 57A9  | -                     | -    | -    | -    | +    | ++   | +++  | ++++ |
| 2      | 510A5 | -                     | -    | -    | -    | -    | -    | -    | -    | 26     | 58G1  | -                     | -    | -    | -    | +    | ++   | +++  | ++++ |
| 3      | 13G9* | -                     | -    | -    | -    | -    | -    | -    | -    | 27     | 510D7 | -                     | -    | -    | -    | +    | ++   | +++  | ++++ |
| 4      | 510A4 | -                     | -    | -    | -    | -    | -    | -    | -    | 28     | 510H4 | -                     | -    | -    | -    | +    | ++   | +++  | ++++ |
| 5      | 51D3  | -                     | -    | -    | -    | -    | -    | -    | +    | 29     | 52C6  | -                     | -    | -    | +    | +    | +++  | ++++ |      |
| 6      | 55A8  | -                     | -    | -    | -    | -    | -    | -    | +    | 30     | 510H7 | -                     | -    | -    | -    | +    | ++   | +++  | ++++ |
| 7      | 51A1  | -                     | -    | -    | -    | -    | -    | -    | +    | 31     | 56E1  | -                     | -    | -    | -    | +    | ++   | +++  | ++++ |
| 8      | 81E1  | -                     | -    | -    | -    | -    | -    | -    | +    | 32     | 56H3  | -                     | -    | -    | -    | +    | ++   | +++  | ++++ |
| 9      | 51E10 | -                     | -    | -    | -    | -    | -    | -    | +    | 33     | 51F11 | -                     | -    | -    | -    | +    | ++   | +++  | ++++ |
| 10     | 51D7  | -                     | -    | -    | -    | -    | -    | -    | +    | 34     | 57C4  | -                     | -    | -    | +    | ++   | +++  | ++++ |      |
| 11     | 07C1  | -                     | -    | -    | -    | -    | -    | +    | +    | 35     | 07B7  | -                     | -    | -    | +    | ++   | +++  | ++++ |      |
| 12     | 53H3  | -                     | -    | -    | -    | -    | -    | +    | +    | 36     | 82F6  | -                     | -    | -    | +    | ++   | +++  | ++++ |      |
| 13     | 52F7  | -                     | -    | -    | -    | -    | -    | +    | +    | 37     | 511G7 | -                     | -    | -    | +    | ++   | +++  | ++++ |      |
| 14     | 57B8  | -                     | -    | -    | -    | -    | -    | +    | ++   | 38     | 51E7  | -                     | -    | -    | +    | ++   | +++  | ++++ |      |
| 15     | 57F7  | -                     | -    | -    | -    | -    | -    | +    | ++   | 39     | 57A6  | -                     | -    | -    | +    | ++   | +++  | ++++ |      |
| 16     | 51D4  | -                     | -    | -    | -    | -    | -    | +    | ++   | 40     | 52G9  | -                     | -    | -    | +    | ++   | +++  | ++++ |      |
| 17     | 55C9  | -                     | -    | -    | -    | -    | -    | +    | ++   | 41     | 56C12 | -                     | -    | -    | +    | ++   | +++  | ++++ |      |
| 18     | 56D7  | -                     | -    | -    | -    | -    | -    | +    | ++   | 42     | 510G4 | -                     | -    | -    | +    | ++   | +++  | ++++ |      |
| 19     | 510H2 | -                     | -    | -    | -    | -    | -    | +    | ++   | 43     | 81C8  | -                     | -    | -    | +    | ++   | +++  | ++++ |      |
| 20     | 81C3  | -                     | -    | -    | -    | -    | -    | +    | ++   | 44     | 511A5 | -                     | -    | -    | +    | ++   | +++  | ++++ |      |
| 21     | 53F12 | -                     | -    | -    | -    | -    | -    | +    | ++   | 45     | 511B4 | -                     | -    | -    | +    | ++   | +++  | ++++ |      |
| 22     | 82A6  | -                     | -    | -    | -    | -    | -    | +    | ++   | 46     | 57A8  | -                     | -    | -    | +    | ++   | +++  | ++++ |      |
| 23     | 51D2  | -                     | -    | -    | -    | -    | -    | +    | ++   | 47     | 57G9  | -                     | -    | -    | +    | ++   | +++  | ++++ |      |
| 24     | 57E11 | -                     | -    | -    | -    | -    | -    | +    | ++   | 48     | 51E12 | -                     | -    | -    | +    | ++   | +++  | ++++ |      |

**B**

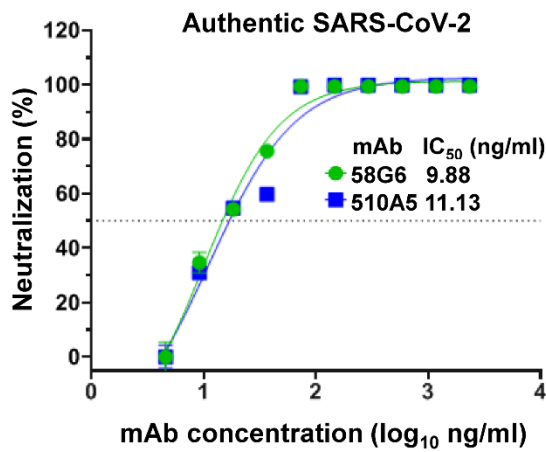

**C**

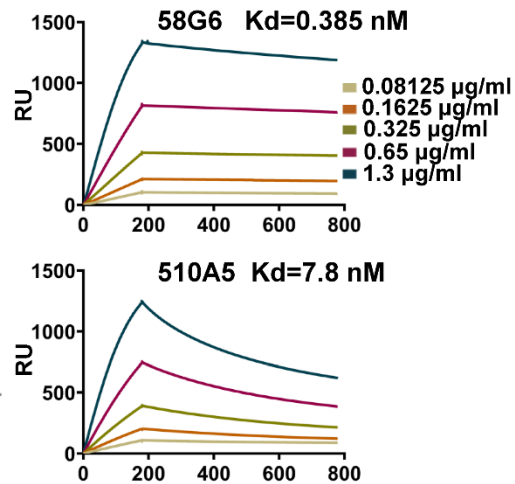

**Figure S1**

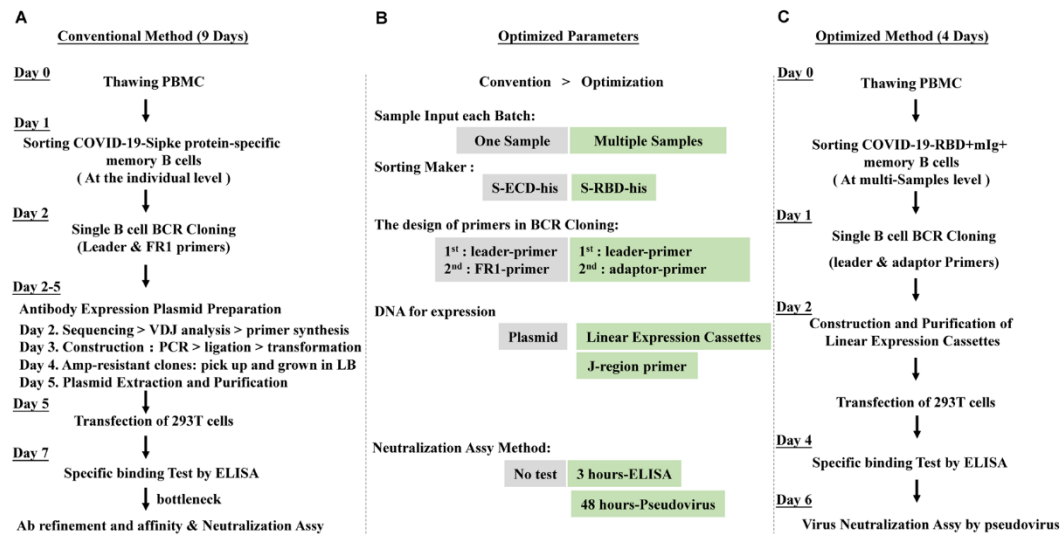

**Figure S2**

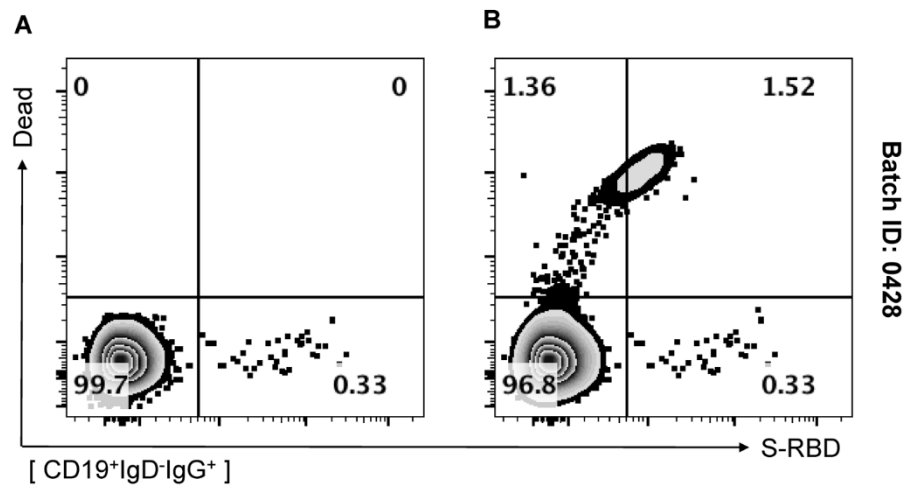

**Figure S3**

**A**

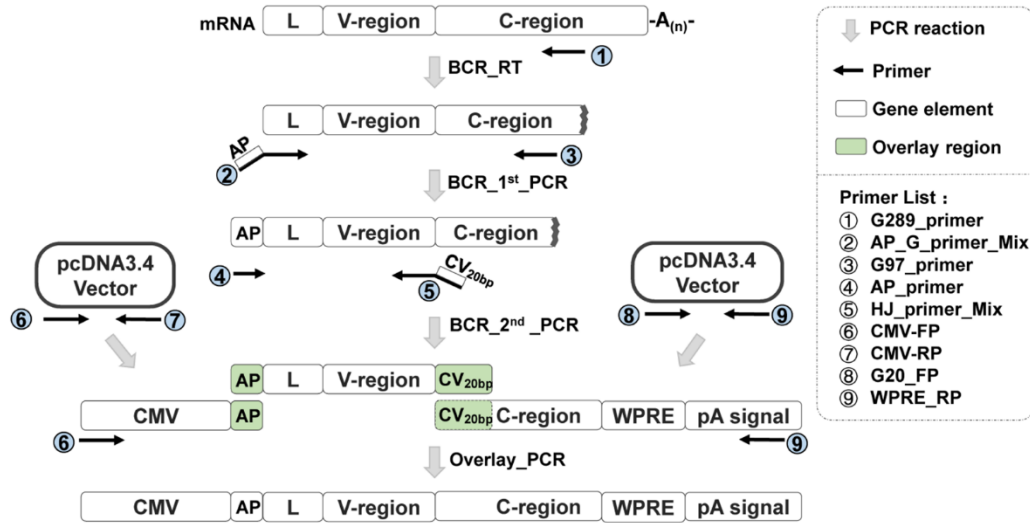

**B**

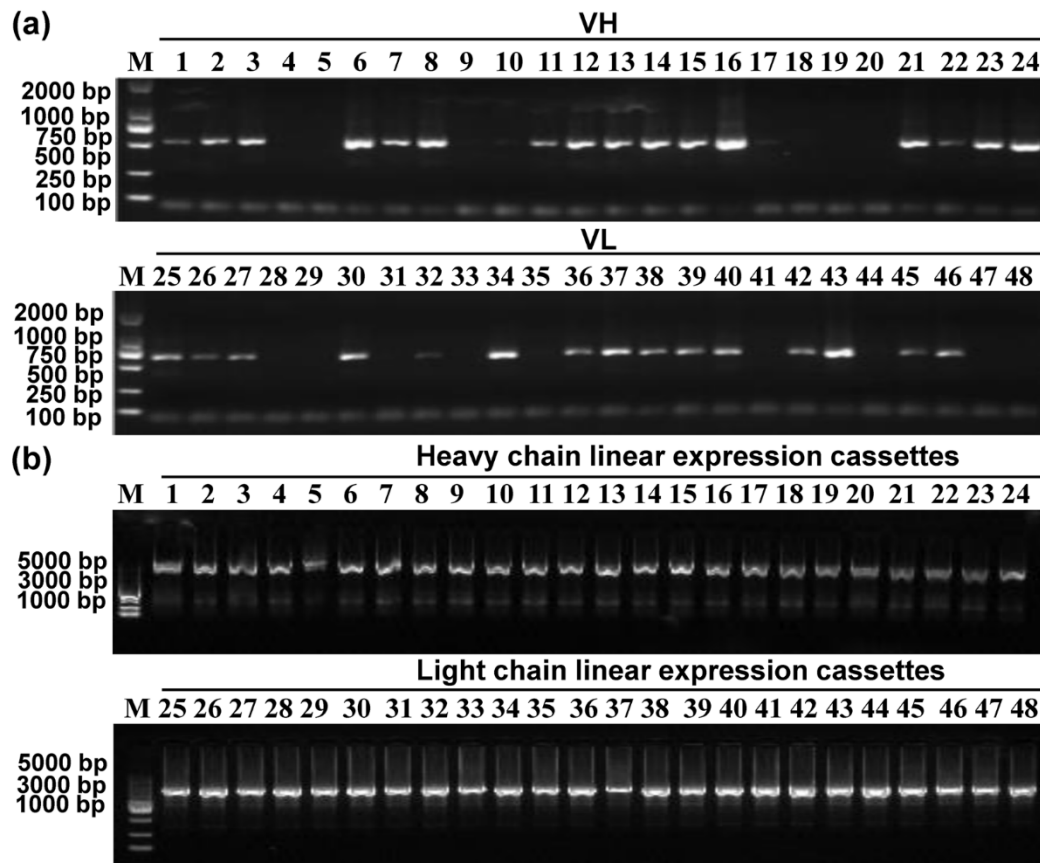

Figure S4

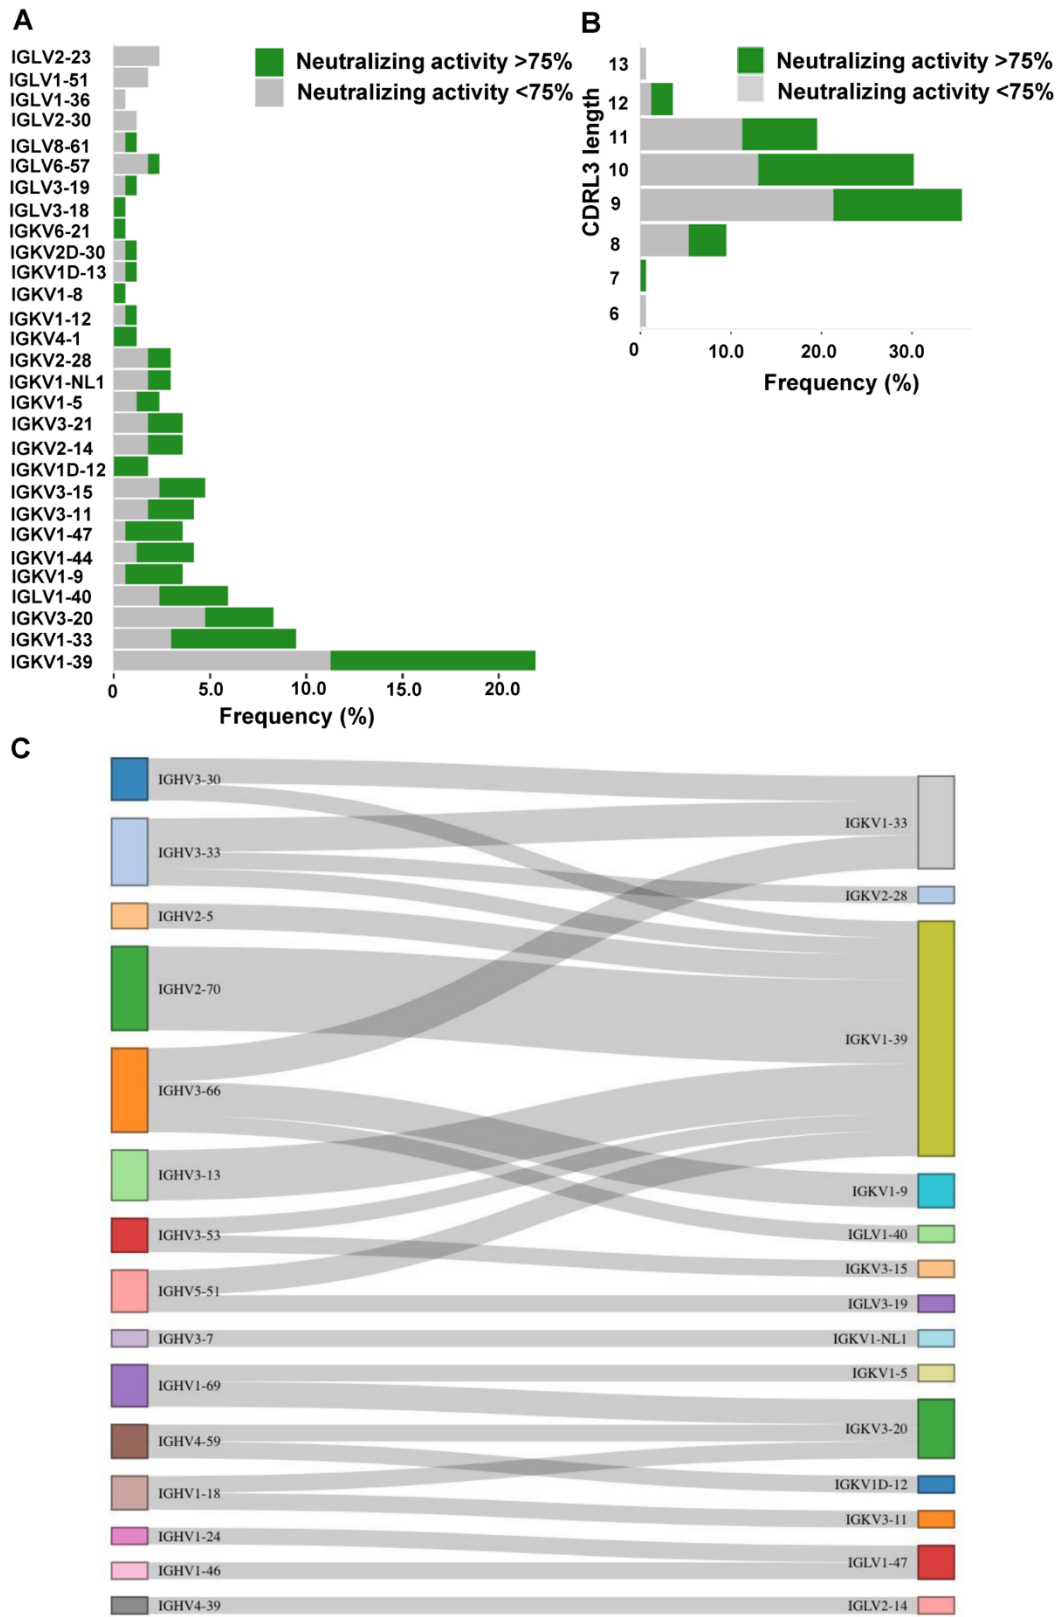

Figure S5

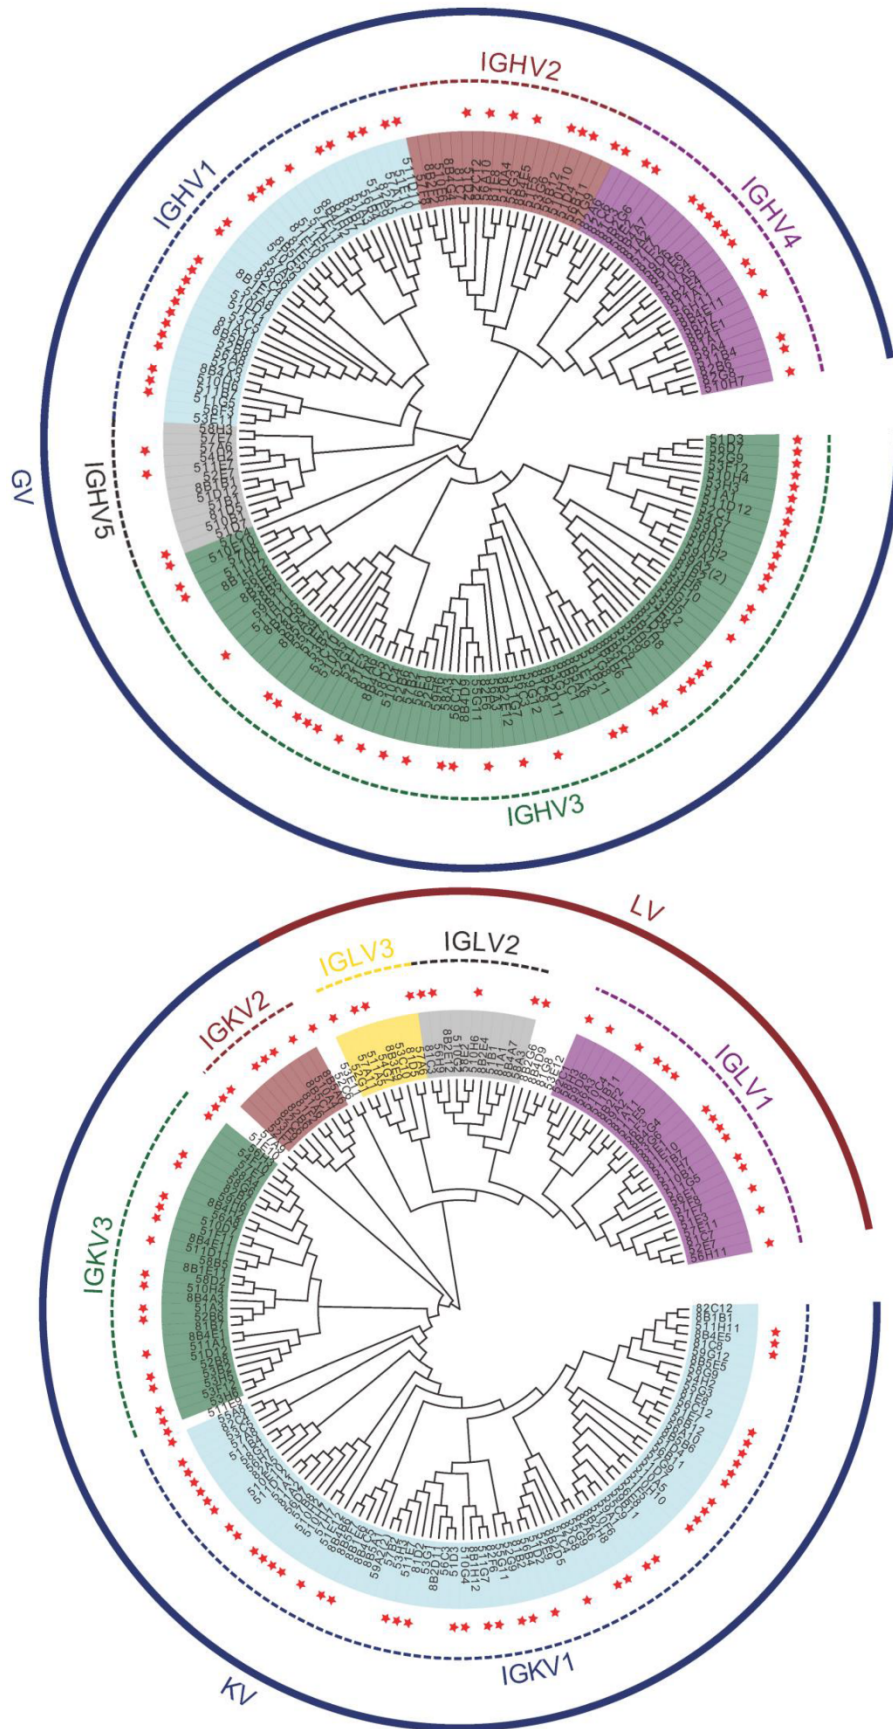

Table S1. Patient information

| Subject | Age (years) | Sex | Subsct type                      | Clinical classification (mild:0, severe:1) | City where infected | Date of admission | Date of discharge | Date of blood sample collection | Volume of collected blood sample |
|---------|-------------|-----|----------------------------------|--------------------------------------------|---------------------|-------------------|-------------------|---------------------------------|----------------------------------|
| P#1     | 46          | F   | SARS-CoV-2 convalescence patient | 0                                          | Chongqing           | 2020/2/3          | 2020/2/28         | 2020/3/16                       | 30ml                             |
| P#2     | 50          | M   | SARS-CoV-2 convalescence patient | 0                                          | Chongqing           | 2020/2/2          | 2020/2/28         | 2020/3/16                       | 30ml                             |
| P#3     | 54          | M   | SARS-CoV-2 convalescence patient | 1                                          | Chongqing           | 2020/1/29         | 2020/2/18         | 2020/3/16                       | 30ml                             |
| P#4     | 47          | M   | SARS-CoV-2 convalescence patient | 1                                          | Chongqing           | 2020/1/27         | 2020/2/23         | 2020/3/16                       | 30ml                             |
| P#5     | 48          | F   | SARS-CoV-2 convalescence patient | 0                                          | Chongqing           | 2020/2/16         | 2020/2/28         | 2020/3/16                       | 30ml                             |
| P#6     | 31          | M   | SARS-CoV-2 convalescence patient | 0                                          | Chongqing           | 2020/1/30         | 2020/2/10         | 2020/3/16                       | 30ml                             |
| P#7     | 45          | F   | SARS-CoV-2 convalescence patient | 0                                          | Chongqing           | 2020/2/1          | 2020/2/15         | 2020/3/16                       | 30ml                             |
| P#8     | 51          | F   | SARS-CoV-2 convalescence patient | 0                                          | Chongqing           | 2020/1/31         | 2020/2/17         | 2020/3/16                       | 50ml                             |
| P#9     | 48          | M   | SARS-CoV-2 convalescence patient | 1                                          | Chongqing           | 2020/1/30         | 2020/2/18         | 2020/4/1                        | 50ml                             |
| P#10    | 31          | M   | SARS-CoV-2 convalescence patient | 0                                          | Chongqing           | 2020/1/29         | 2020/2/18         | 2020/4/1                        | 50ml                             |
| P#11    | 54          | M   | SARS-CoV-2 convalescence patient | 0                                          | Chongqing           | 2020/2/2          | 2020/2/18         | 2020/4/1                        | 30ml                             |
| P#12    | 47          | F   | SARS-CoV-2 convalescence patient | 0                                          | Chongqing           | 2020/1/31         | 2020/2/10         | 2020/4/1                        | 10ml                             |
| P#13    | 38          | M   | SARS-CoV-2 convalescence patient | 0                                          | Chongqing           | 2020/2/10         | 2020/2/19         | 2020/4/1                        | 10ml                             |
| P#14    | 33          | F   | SARS-CoV-2 convalescence patient | 0                                          | Chongqing           | 2020/2/10         | 2020/3/9          | 2020/4/1                        | 10ml                             |
| P#15    | 44          | M   | SARS-CoV-2 convalescence patient | 0                                          | Chongqing           | 2020/2/5          | 2020/2/14         | 2020/4/1                        | 50ml                             |
| P#16    | 60          | F   | SARS-CoV-2 convalescence patient | 0                                          | Chongqing           | 2020/2/11         | 2020/3/5          | 2020/4/1                        | 30ml                             |
| P#17    | 48          | M   | SARS-CoV-2 convalescence patient | 0                                          | Chongqing           | 2020/2/12         | 2020/3/6          | 2020/4/1                        | 30ml                             |
| P#18    | 53          | F   | SARS-CoV-2 convalescence patient | 0                                          | Chongqing           | 2020/2/16         | 2020/2/28         | 2020/4/1                        | 10ml                             |
| P#19    | 57          | M   | SARS-CoV-2 convalescence patient | 0                                          | Chongqing           | 2020/1/29         | 2020/2/14         | 2020/4/1                        | 10ml                             |
| P#20    | 44          | M   | SARS-CoV-2 convalescence patient | 0                                          | Chongqing           | 2020/2/6          | 2020/2/29         | 2020/4/1                        | 10ml                             |
| P#21    | 44          | F   | SARS-CoV-2 convalescence patient | 0                                          | Chongqing           | 2020/2/13         | 2020/3/11         | 2020/4/1                        | 30ml                             |
| P#22    | 20          | F   | SARS-CoV-2 convalescence patient | 0                                          | Chongqing           | 2020/2/15         | 2020/2/25         | 2020/4/1                        | 30ml                             |
| P#23    | 37          | M   | SARS-CoV-2 convalescence patient | 0                                          | Chongqing           | 2020/2/2          | 2020/3/9          | 2020/4/1                        | 50ml                             |
| P#24    | 44          | F   | SARS-CoV-2 convalescence patient | 0                                          | Chongqing           | 2020/2/3          | 2020/2/28         | 2020/4/1                        | 50ml                             |
| P#25    | 41          | M   | SARS-CoV-2 convalescence patient | 0                                          | Chongqing           | 2020/1/31         | 2020/2/16         | 2020/4/1                        | 14ml                             |
| P#26    | 66          | M   | SARS-CoV-2 convalescence patient | 0                                          | Chongqing           | 2020/2/3          | 2020/2/16         | 2020/4/1                        | 10ml                             |
| P#27    | 67          | F   | SARS-CoV-2 convalescence patient | 0                                          | Chongqing           | 2020/2/4          | 2020/2/16         | 2020/4/1                        | 10ml                             |
| P#28    | 50          | M   | SARS-CoV-2 convalescence patient | 1                                          | Chongqing           | 2020/2/1          | 2020/2/29         | 2020/4/1                        | 30ml                             |
| P#29    | 50          | F   | SARS-CoV-2 convalescence patient | 0                                          | Chongqing           | 2020/1/28         | 2020/2/29         | 2020/4/1                        | 50ml                             |
| P#30    | 49          | F   | SARS-CoV-2 convalescence patient | 0                                          | Chongqing           | 2020/2/8          | 2020/3/6          | 2020/4/1                        | 30ml                             |
| P#31    | 56          | M   | SARS-CoV-2 convalescence patient | 0                                          | Chongqing           | 2020/2/1          | 2020/2/9          | 2020/4/1                        | 30ml                             |
| P#32    | 55          | M   | SARS-CoV-2 convalescence patient | 0                                          | Chongqing           | 2020/2/14         | 2020/2/21         | 2020/4/1                        | 50ml                             |
| P#33    | 45          | F   | SARS-CoV-2 convalescence patient | 0                                          | Chongqing           | 2020/2/1          | 2020/2/15         | 2020/4/1                        | 30ml                             |
| P#34    | 47          | F   | SARS-CoV-2 convalescence patient | 0                                          | Chongqing           | 2020/2/6          | 2020/2/17         | 2020/4/1                        | 10ml                             |
| P#35    | 34          | M   | SARS-CoV-2 convalescence patient | 0                                          | Chongqing           | 2020/1/28         | 2020/2/7          | 2020/4/1                        | 10ml                             |
| P#36    | 47          | M   | SARS-CoV-2 convalescence patient | 1                                          | Chongqing           | 2020/1/27         | 2020/2/23         | 2020/4/1                        | 50ml                             |
| P#37    | 56          | M   | SARS-CoV-2 convalescence patient | 0                                          | Chongqing           | 2020/1/30         | 2020/2/7          | 2020/4/1                        | 40ml                             |
| P#38    | 63          | F   | SARS-CoV-2 convalescence patient | 0                                          | Chongqing           | 2020/2/1          | 2020/2/25         | 2020/4/1                        | 10ml                             |
| P#39    | 37          | M   | SARS-CoV-2 convalescence patient | 0                                          | Chongqing           | 2020/1/27         | 2020/2/14         | 2020/4/1                        | 10ml                             |



Table S2. Three batches of S-RBD specific B memory cell sorting

| Batch | Sample count | Subject | Volume of blood used for sorting(ml) | Total volume of blood(ml) | Number of sorted 96 wells plates | Number of Paired mAbs after BCR RT-PCR | Number of Specific mAbs (note-01) | Number of Neutralizing mAbs (note-01) |
|-------|--------------|---------|--------------------------------------|---------------------------|----------------------------------|----------------------------------------|-----------------------------------|---------------------------------------|
| 0428  | 1            | p#10    | 10                                   | 70                        | 2                                | 72                                     | 29                                | 12                                    |
|       | 2            | p#11    | 10                                   |                           |                                  |                                        |                                   |                                       |
|       | 3            | p#29    | 10                                   |                           |                                  |                                        |                                   |                                       |
|       | 4            | p#30    | 10                                   |                           |                                  |                                        |                                   |                                       |
|       | 5            | p#32    | 10                                   |                           |                                  |                                        |                                   |                                       |
|       | 6            | p#36    | 10                                   |                           |                                  |                                        |                                   |                                       |
|       | 7            | p#37    | 10                                   |                           |                                  |                                        |                                   |                                       |
| 0505  | 1            | p#8     | 10                                   | 60                        | 11                               | 324                                    | 127                               | 75                                    |
|       | 2            | p#16    | 15                                   |                           |                                  |                                        |                                   |                                       |
|       | 3            | p#17    | 15                                   |                           |                                  |                                        |                                   |                                       |
|       | 4            | p#26    | 10                                   |                           |                                  |                                        |                                   |                                       |
|       | 5            | p#27    | 10                                   |                           |                                  |                                        |                                   |                                       |
| 0528  | 1            | p#01    | 10                                   | 75                        | 4.5                              | 101                                    | 42                                | 9                                     |
|       | 2            | p#03    | 10                                   |                           |                                  |                                        |                                   |                                       |
|       | 3            | p#04    | 10                                   |                           |                                  |                                        |                                   |                                       |
|       | 4            | p#06    | 10                                   |                           |                                  |                                        |                                   |                                       |
|       | 5            | p#09    | 10                                   |                           |                                  |                                        |                                   |                                       |
|       | 6            | p#22    | 10                                   |                           |                                  |                                        |                                   |                                       |
|       | 7            | p#25    | 5                                    |                           |                                  |                                        |                                   |                                       |
|       | 8            | p#28    | 5                                    |                           |                                  |                                        |                                   |                                       |
|       | 9            | p#31    | 5                                    |                           |                                  |                                        |                                   |                                       |
| Sum:  |              |         |                                      |                           |                                  | 497                                    | 198                               | 96                                    |

Note-01: the linear expression cassettes were transfected into 293T cells for expressing Ab proteins. The supernatants of cell cultures were collected 48hs later. the specific binding ability were assessed by ELISA. the neutralizaion capability were assessed by pseudovirus assay.

Table S3. BCR RT-PCR Reaction mixture and PCR Program setup

### Section 01. Single Cell BCR RT-PCR Procedure

#### 1. Preparation of PCR Reaction Mixture

##### (1) Preparation of RT

###### a. Preparation of RT\_Mix\_A (5µl/tube)

| Seq. | Component         | Amount (µl) |
|------|-------------------|-------------|
| 1    | Water             | 2.6         |
| 2    | 2.5 mM dNTPs      | 2           |
| 3    | BCR_RT_Primer_Mix | 0.4         |

###### b. Preparation of RT\_Mix\_B (5µl/tube)

| Seq. | Component                                     | Amount (µl) |
|------|-----------------------------------------------|-------------|
| 4    | Water                                         | 2.25        |
| 5    | 5×PrimeScript II Buffer                       | 2           |
| 6    | 200 U/µl PrimeScript II Reverse Transcriptase | 0.5         |
| 7    | 40,000 U/ml RNase Inhibitor, Murine (NEB)     | 0.25        |

##### (2) Preparation of 1st and 2nd PCR (10µl/tube)

1st\_PCR\_Mix\_N and 2nd\_PCR\_Mix\_N use the same reaction condition except the primers.

| Seq. | Component                            | Amount (µl) |
|------|--------------------------------------|-------------|
| 1    | 2×PrimeSTAR GC Buffer (Takara)       | 5           |
| 2    | nuclease-free water                  | 2.75        |
| 3    | 2.5 mM dNTP                          | 0.8         |
| 4    | 10 µM Forward Primer                 | 0.2         |
| 5    | 10 µM Reverse Primer                 | 0.2         |
| 6    | 2.5 U/µl PrimeSTAR HS DNA polymerase | 0.05        |
| 7    | Template                             | 0           |

##### (3) Usage of primers

###### a. For 1st\_PCR\_Mix

|                | For 1st_PCR_Mix_Gamma | For 1st_PCR_Mix_Kappa | For 1st_PCR_Mix_Lambda |
|----------------|-----------------------|-----------------------|------------------------|
| Forward Primer | AP_G_leader Mix       | AP_K_leader Mix       | AP_L_leader Mix        |
| Reverse Primer | G289_primer(10µM)     | K244_Primer(10µM)     | L81_Primer(10µM)       |

###### b. For 2nd\_PCR\_Mix

|                | For 2nd_PCR_Mix_Gamma  | For 2nd_PCR_Mix_Kappa | For 2nd_PCR_Mix_Lambda |
|----------------|------------------------|-----------------------|------------------------|
| Forward Primer | 10 µM AP_Primer        | 10 µM AP_Primer       | 10 µM AP_Primer        |
| Reverse Primer | IGHJ_region_Primer Mix | 10 µM K194_Primer Mix | 10 µM L19_Primer Mix   |

##### 2. Operation Procedure

- (1) Take out the sorted 96-well plate at -80. Add 5µl RT\_Mix\_A to each well, and rinse the well to promote cell RNA dissolution.
- (2) Incubate the plate at 65° for 5min and put it on ice immediately.
- (3) Add 5µl of RT\_Mix\_B to each well of the plate, mix and centrifuge, and then perform RT reaction.
- (4) 9µl aliquots of 1st\_PCR\_Mix in a new 96 wells plate, add 1µl RT product to each well, and then perform 1st PCR Reaction.
- (5) After PCR is completed, the 1st product is ten-fold diluted, and 1µl is used as a template for the next round of PCR.
- (6) 9µl aliquot 2nd\_PCR\_Mix in a new 96 wells plate, add 1µl 1st diluted product to each well, and then perform 2nd PCR Reaction.
- (7) Prepare 2% agar gel, load 3µl sample to analysis PCR result.

### Section 02. PCR Program Setup

#### 1. For RT Reaction

|     |          |
|-----|----------|
| 45° | 45min    |
| 70° | 15min    |
| 4°  | infinity |

#### 2. For 1st PCR Reaction

|     |          |          |
|-----|----------|----------|
| 95  | 3min     | 30cycles |
| 95  | 10s      |          |
| 55  | 5s       |          |
| 72° | 1min     |          |
| 72° | 5min     |          |
| 4°  | infinity |          |

#### 3. For 2nd PCR Reaction

|     |          |          |
|-----|----------|----------|
| 95  | 3min     | 35cycles |
| 95  | 10s      |          |
| 55  | 5s       |          |
| 72° | 45s      |          |
| 72° | 5min     |          |
| 4°  | infinity |          |

Table S4. Primers List of BCR RT-PCR

| Primer_Name    | V/D/J gene segments | Primer_Sequence(5'>3')                     | Usage description                                        |
|----------------|---------------------|--------------------------------------------|----------------------------------------------------------|
| GV_01          | IGHV1-18*01         | CGGTACCGCGGGCCCGGAatggactggacctggagcat     | AP_G_Leader_Mix                                          |
| GV_02          | IGHV1-2*01          | CGGTACCGCGGGCCCGGAatggactggacctggagcat     | As forward primer of heavy chain 1st PCR                 |
| GV_03          | IGHV1-24*01         | CGGTACCGCGGGCCCGGAatggactggacctggagcat     |                                                          |
| GV_04          | IGHV1-38-4*01       | CGGTACCGCGGGCCCGGAatggactggacctggagcat     |                                                          |
| GV_05          | IGHV1-45*01         | CGGTACCGCGGGCCCGGAatggactggacctggagcat     |                                                          |
| GV_06          | IGHV1-46*01         | CGGTACCGCGGGCCCGGAatggactggacctggagcat     |                                                          |
| GV_07          | IGHV1-58*01         | CGGTACCGCGGGCCCGGAatggactggacctggagcat     |                                                          |
| GV_08          | IGHV1-69*01         | CGGTACCGCGGGCCCGGAatggactggacctggagcat     |                                                          |
| GV_09          | IGHV2-26*01         | CGGTACCGCGGGCCCGGAatggacacactttgctccac     |                                                          |
| GV_10          | IGHV2-5*01          | CGGTACCGCGGGCCCGGAatggacacactttgctccac     |                                                          |
| GV_11          | IGHV2-70*01         | CGGTACCGCGGGCCCGGAatggacatactttgctccac     |                                                          |
| GV_12          | IGHV2-OR16-5*01     | CGGTACCGCGGGCCCGGAatggacacactttgctccac     |                                                          |
| GV_13          | IGHV3-11*01         | CGGTACCGCGGGCCCGGAatggagtgtggcctgagctg     |                                                          |
| GV_14          | IGHV3-13*01         | CGGTACCGCGGGCCCGGAatggagtgtggcctgagctg     |                                                          |
| GV_15          | IGHV3-16*01         | CGGTACCGCGGGCCCGGAatggagtgtggcctgagctg     |                                                          |
| GV_16          | IGHV3-21*01         | CGGTACCGCGGGCCCGGAatggagtgtggcctgagctg     |                                                          |
| GV_17          | IGHV3-43*01         | CGGTACCGCGGGCCCGGAatggagtgtggcctgagctg     |                                                          |
| GV_18          | IGHV3-48*01         | CGGTACCGCGGGCCCGGAatggagtgtggcctgagctg     |                                                          |
| GV_19          | IGHV3-49*01         | CGGTACCGCGGGCCCGGAatggagtgtggcctgagctg     |                                                          |
| GV_20          | IGHV3-53*01         | CGGTACCGCGGGCCCGGAatggagtgtggcctgagctg     |                                                          |
| GV_21          | IGHV3-64*01         | CGGTACCGCGGGCCCGGAatggagtgtggcctgagctg     |                                                          |
| GV_22          | IGHV3-64D*06        | CGGTACCGCGGGCCCGGAatggagtgtggcctgagctg     |                                                          |
| GV_23          | IGHV3-7*01          | CGGTACCGCGGGCCCGGAatggagtgtggcctgagctg     |                                                          |
| GV_24          | IGHV3-9*01          | CGGTACCGCGGGCCCGGAatggagtgtggcctgagctg     |                                                          |
| GV_25          | IGHV4-28*01         | CGGTACCGCGGGCCCGGAatgaaacacactgtggttctt    |                                                          |
| GV_26          | IGHV4-38-2*02       | CGGTACCGCGGGCCCGGAatgaaacacactgtggttctt    |                                                          |
| GV_27          | IGHV4-39*01         | CGGTACCGCGGGCCCGGAatgaaacacactgtggttctt    |                                                          |
| GV_28          | IGHV4-59*01         | CGGTACCGCGGGCCCGGAatgaaacacactgtggttctt    |                                                          |
| GV_29          | IGHV5-10-1*02       | CGGTACCGCGGGCCCGGAatgcaagtggggcctctcc      |                                                          |
| GV_30          | IGHV5-51*01         | CGGTACCGCGGGCCCGGAatgcaagtggggcctctcc      |                                                          |
| GV_31          | IGHV6-1*01          | CGGTACCGCGGGCCCGGAatgctgtctctctctctct      |                                                          |
| KV_01          | IGKV1-OR2-0*01      | CGGTACCGCGGGCCCGGAatgagggcccccaactcaagct   | AP_K_Leader_Mix                                          |
| KV_02          | IGKV1-OR2-108*01    | CGGTACCGCGGGCCCGGAatgagggcccccaactcaagct   | As forward primer of kappa light chain 1st PCR           |
| KV_03          | IGKV1-16*01         | CGGTACCGCGGGCCCGGAatgacatgagagctcctcgc     |                                                          |
| KV_04          | IGKV1-27*01         | CGGTACCGCGGGCCCGGAatgacatgagagctcctcgc     |                                                          |
| KV_05          | IGKV1-5*01          | CGGTACCGCGGGCCCGGAatgacatgagagctcctcgc     |                                                          |
| KV_06          | IGKV1-8*01          | CGGTACCGCGGGCCCGGAatgagggctccccctcaagct    |                                                          |
| KV_07          | IGKV1D-16*01        | CGGTACCGCGGGCCCGGAatgacatgagagctcctcgc     |                                                          |
| KV_08          | IGKV1D-43*01        | CGGTACCGCGGGCCCGGAatgacatgagagctcctcgc     |                                                          |
| KV_09          | IGKV2-24*01         | CGGTACCGCGGGCCCGGAatgagggctccttctcaagct    |                                                          |
| KV_10          | IGKV2-28*01         | CGGTACCGCGGGCCCGGAatgagggctccttctcaagct    |                                                          |
| KV_11          | IGKV3-OR2-268*01    | CGGTACCGCGGGCCCGGAatgaaagcccccaagcagct     |                                                          |
| KV_12          | IGKV3-15*01         | CGGTACCGCGGGCCCGGAatgaaagcccccaagcagct     |                                                          |
| KV_13          | IGKV3-20*01         | CGGTACCGCGGGCCCGGAatgaaagcccccaagcagct     |                                                          |
| KV_14          | IGKV3-7*01          | CGGTACCGCGGGCCCGGAatgaaagcccccaagcagct     |                                                          |
| KV_15          | IGKV3D-7*01         | CGGTACCGCGGGCCCGGAatgaaagcccccaagcagct     |                                                          |
| KV_16          | IGKV4-1*01          | CGGTACCGCGGGCCCGGAatgggtgtgcagaccagct      |                                                          |
| KV_17          | IGKV5-2*01          | CGGTACCGCGGGCCCGGAatgggtgtgcagaccagct      |                                                          |
| KV_18          | IGKV6-21*01         | CGGTACCGCGGGCCCGGAatgtgtccatcacaactcaat    |                                                          |
| KV_19          | IGKV6D-41*01        | CGGTACCGCGGGCCCGGAatgtgtccatcacaactcaat    |                                                          |
| LV_01          | IGLV1-40*01         | CGGTACCGCGGGCCCGGAatggcctggctctctctctct    | AP_L_Leader_Mix                                          |
| LV_02          | IGLV1-41*01         | CGGTACCGCGGGCCCGGAatggcctggctctctctctct    | As forward primer of lambda light chain 1st PCR          |
| LV_03          | IGLV1-47*02         | CGGTACCGCGGGCCCGGAatggcctggctctctctctct    |                                                          |
| LV_04          | IGLV1-54*02         | CGGTACCGCGGGCCCGGAatggcctggctctctctctct    |                                                          |
| LV_05          | IGLV1-55*01         | CGGTACCGCGGGCCCGGAatggcctggctctctctctct    |                                                          |
| LV_06          | IGLV2-8*02          | CGGTACCGCGGGCCCGGAatggcctggctctctctctct    |                                                          |
| LV_07          | IGLV3-1*01          | CGGTACCGCGGGCCCGGAatggcctggctctctctctct    |                                                          |
| LV_08          | IGLV3-10*02         | CGGTACCGCGGGCCCGGAatggcctggcctggacccctctct |                                                          |
| LV_09          | IGLV3-19*01         | CGGTACCGCGGGCCCGGAatggcctggcctggacccctctct |                                                          |
| LV_10          | IGLV3-21*01         | CGGTACCGCGGGCCCGGAatggcctggcctggacccctctct |                                                          |
| LV_11          | IGLV3-25*02         | CGGTACCGCGGGCCCGGAatggcctggcctggacccctctct |                                                          |
| LV_12          | IGLV3-27*01         | CGGTACCGCGGGCCCGGAatggcctggcctggacccctctct |                                                          |
| LV_13          | IGLV3-9*02          | CGGTACCGCGGGCCCGGAatggcctggcctggacccctctct |                                                          |
| LV_14          | IGLV4-3*01          | CGGTACCGCGGGCCCGGAatggcctggcctggacccctctct |                                                          |
| LV_15          | IGLV4-60*02         | CGGTACCGCGGGCCCGGAatggcctggcctggacccctctct |                                                          |
| LV_16          | IGLV5-39*02         | CGGTACCGCGGGCCCGGAatggcctggcctggacccctctct |                                                          |
| LV_17          | IGLV6-57*02         | CGGTACCGCGGGCCCGGAatggcctggcctggacccctctct |                                                          |
| LV_18          | IGLV7-43*01         | CGGTACCGCGGGCCCGGAatggcctggcctggacccctctct |                                                          |
| LV_19          | IGLV8-61*02         | CGGTACCGCGGGCCCGGAatggcctggcctggacccctctct |                                                          |
| LV_20          | IGLV8/OR8-1*02      | CGGTACCGCGGGCCCGGAatggcctggcctggacccctctct |                                                          |
| LV_21          | IGLV9-49*02         | CGGTACCGCGGGCCCGGAatggcctggcctggacccctctct |                                                          |
| IGHJ_01        | IGHJ1*01            | GATGGGCCCTTGGTGGAGGGTGAAGGACAGGTGACACAGG   | IGHJ_region_Primer_Mix                                   |
| IGHJ_02        | IGHJ2*01            | GATGGGCCCTTGGTGGAGGGTGAAGGACAGGTGACACAGG   |                                                          |
| IGHJ_03        | IGHJ3*01            | GATGGGCCCTTGGTGGAGGGTGAAGGACAGGTGACACATG   |                                                          |
| IGHJ_04        | IGHJ6*01            | GATGGGCCCTTGGTGGAGGGTGAAGGACAGGTGACACATG   |                                                          |
| IGKJ_01        | IGKJ1*01            | GATGGTGCAGCCACAGTTCGTTTGAATTCACACTTGGTCC   | IGKJ_region_Primer_Mix                                   |
| IGKJ_02        | IGKJ2*01            | GATGGTGCAGCCACAGTTCGTTTGAATTCACACTTGGTCC   |                                                          |
| IGKJ_03        | IGKJ3*01            | GATGGTGCAGCCACAGTTCGTTTGAATTCACACTTGGTCC   |                                                          |
| IGKJ_04        | IGKJ4*01            | GATGGTGCAGCCACAGTTCGTTTGAATTCACACTTGGTCC   |                                                          |
| IGKJ_05        | IGKJ5*01            | GATGGTGCAGCCACAGTTCGTTTGAATTCACACTTGGTCC   |                                                          |
| IGLJ_01        | IGLJ1*01            | GGGGCAGCCTTGGGCTGACCTAGGACGGTACCTTGGTCC    | IGLJ_region_Primer_Mix                                   |
| IGLJ_02        | IGLJ2*01            | GGGGCAGCCTTGGGCTGACCTAGGACGGTACCTTGGTCC    |                                                          |
| IGLJ_03        | IGLJ4*01            | GGGGCAGCCTTGGGCTGACCTAGGACGGTACCTTGGTCC    |                                                          |
| IGLJ_04        | IGLJ5*01            | GGGGCAGCCTTGGGCTGACCTAGGACGGTACCTTGGTCC    |                                                          |
| IGLJ_05        | IGLJ5*02            | GGGGCAGCCTTGGGCTGACCTAGGACGGTACCTTGGTCC    |                                                          |
| IGLJ_06        | IGLJ6*01            | GGGGCAGCCTTGGGCTGACCTAGGACGGTACCTTGGTCC    |                                                          |
| IGLJ_07        | IGLJ7*01            | GGGGCAGCCTTGGGCTGACCTAGGACGGTACCTTGGTCC    |                                                          |
| IGLJ_08        | IGLJ7*02            | GGGGCAGCCTTGGGCTGACCTAGGACGGTACCTTGGTCC    |                                                          |
| G289-primer    | N.D.                | TCTTGTCCACTTGGTGTGCT                       | As reverse primer of heavy chain RT & 1st PCR            |
| G97-primer     | N.D.                | AGTAGTCTTTGACACGGCAGCCAG                   | As reverse primer of heavy chain 2nd PCR                 |
| K244-primer    | N.D.                | GTTCCTCGTAGTCTGCTTTGCTCA                   | As reverse primer of kappa light chain RT & 1st PCR      |
| K194-primer-01 | N.D.                | GTGCTGCTTGTCTGCTGCT                        | As reverse primer of kappa light chain 2nd PCR           |
| K194-primer-02 | N.D.                | GTGCTGCTTGTCTGCTGCT                        |                                                          |
| L81-primer     | N.D.                | CACCACTGTGGCCCTTGTGGCTTG                   | As reverse primer of lambda light chain RT & 1st PCR     |
| L19-primer-01  | N.D.                | GGGCGGAACAGAGTGACC                         | As reverse primer of lambda light chain 2nd PCR          |
| L19-primer-02  | N.D.                | GGGCGGAACAGAGTGACC                         |                                                          |
| L19-primer-03  | N.D.                | GGGCGGAACAGAGTGACC                         |                                                          |
| AP3            | N.D.                | CGGTACCGCGGGCCCGGA                         | As forward primer of 2nd PCR                             |
| G20FP          | N.D.                | CCCTCCACCAAGGCCCATC                        | Construction of the linear antibody expression cassettes |
| K20FP          | N.D.                | CGAATGTGGCTGCACCATC                        |                                                          |
| L20FP          | N.D.                | GGTCAGCCCAAGGCTGCCCC                       |                                                          |
| CMV-FP-01      | N.D.                | AGATATACCGGTTGACATTG                       |                                                          |
| CMV-RP         | N.D.                | TCCCGGGCCCGCGGTACCG                        |                                                          |
| WPRE-RP        | N.D.                | AGCCCCAGCTGCCGAGATCT                       |                                                          |

Table S5. Preparation of BCR Cloning primers

|                                                                                                                                                                                                                                                                                                                                                                                                                                                       |
|-------------------------------------------------------------------------------------------------------------------------------------------------------------------------------------------------------------------------------------------------------------------------------------------------------------------------------------------------------------------------------------------------------------------------------------------------------|
| <b>Step 01. Dissolve primer powder in water</b>                                                                                                                                                                                                                                                                                                                                                                                                       |
| the leader primers and J-region primers are dissolved to 100uM<br>the other primers are dissolved to 10µM                                                                                                                                                                                                                                                                                                                                             |
| <b>Step 02. Preparation of BCR_RT_Primer_Mix (each 2µM)</b>                                                                                                                                                                                                                                                                                                                                                                                           |
| take 100µl G289_primer(10µM), K244_primer(10µM), L81 primer(10µM), respectively, then mix according to 1:1:1.                                                                                                                                                                                                                                                                                                                                         |
| <b>Step 03. Preparation of AP_Leader_Mix (each 2µM)</b>                                                                                                                                                                                                                                                                                                                                                                                               |
| (1) For AP_G_Leader_Mix: Add 380µl water to a 1.5ml centrifuge tube, and take 20µl each of the 31 GV_N primers, and the final volume is 1000µl;<br>(2) For AP_K_Leader_Mix: Add 620µl water to a 1.5ml centrifuge tube, and take 20µl each of the 19 KV_N primers, and the final volume is 1000µl;<br>(3) For AP_L_Leader_Mix: Add 580µl water to a 1.5ml centrifuge tube, and take 20µl each of the 21 LV_N primers, and the final volume is 1000µl; |
| <b>Step 04. Preparation of IGHJ_region_Primer_Mix (each 2µM)</b>                                                                                                                                                                                                                                                                                                                                                                                      |
| Add 920µl water to a 1.5ml centrifuge tube, and take 20µl each of the 4 IGHJ_N primers, and the                                                                                                                                                                                                                                                                                                                                                       |
| <b>Step 05. Preparation of K194_Primer_Mix</b>                                                                                                                                                                                                                                                                                                                                                                                                        |
| take 100µl each of the following 2 primers, then mix:<br>K194-primer-01 (10µM)<br>K194-primer-02 (10µM)                                                                                                                                                                                                                                                                                                                                               |
| <b>Step 06. Preparation of L19_Primer_Mix</b>                                                                                                                                                                                                                                                                                                                                                                                                         |
| take 100µl each of the following 3 primers, then mix:<br>L19-primer-01 (10µM)<br>L19-primer-02 (10µM)<br>L19-primer-03 (10µM)                                                                                                                                                                                                                                                                                                                         |

Table S6. Annotation of linear antibody expression cassettes

Linear expression cassettes For IGHC

|                            |                                                                                                                                                           |
|----------------------------|-----------------------------------------------------------------------------------------------------------------------------------------------------------|
| CMV-FP Primer              | [AGATATACGCGTTGACATTG] [ATTATTGACTAGTTATTAATAGTAATCAATTACGGGGTCATTAGTTTCATAGCCCATATATGGAGTTCGCGGTACATAACTTACGGTAAATGGCCCGCTGGCTGACCGCCCAACGACCCCGCC       |
| CMV promoter               | ATTGACGTCATAATGACGTATGTTCCCATAGTAACGCCAATAGGGACTTTCATTGACGTCATATGGGTGGAGTATTTACGGTAAACTGCCCACTGGGCAGTACATCAAGTGATCATATGCCAAGTACGCCCCCTATTGACGTCAATG       |
| CMV-RP Primer              | ACGGTAAATGGCCCGCTGGCATTATGCCAGTACATGACCTTATGGGACTTTCCTACTTGGCAGTACATCTACGTATTAGTCATCGCTATTACCATTGGTGTATGCGGTTTGGCAGTACATCAATGGCGTGGATAGCGGTTGACTCA        |
| G20 Primer                 | CGGGGATTTCCAAGTCTCCACCCATTGACGTCAATGGGAGTTTGTGTTGGCACAAAATCAACGGGACTTTCAAAATGTCGTAACACTCCGCCCAATTGACGAAAATGGCCGGTAGCGGTGACGGTGTATATAAGCAG                 |
| hman IGHG1 Constant region | AGCTCGTTTAGTGAAACCGTCAGATCGCTGGAGACGCCATCCACCGTGTGTTGACCTCCA) TAGAAGACACCGGGACCGATCCAGCTCCGGACTCTAGACTTCGAAATCTGCGAGTCGA [CGGTACCGCGGGCCCGGGA] [2nd-PCR   |
| WPRE                       | <b>product</b> ] [CCCTCCACCAAGGCCCATC] [GGTCTTCCCCCTGGCACCCCTCCCAAGAGCACCTCTGGGGGCACAGCGCCCTGGGCTGCCTGGTCAAGGACTACTTCCCCGAACCGGTGACGGTGTCTGGAACTCAGGCCCTG |
| poly(A) signal             | ACCAGCGCGGTGCACACCTTCCCGGCTGTCCTACAGTCCCTCAGGACTCTACTCCCTCAGCAGCGTGGTACCGCTCCCTCCAGCAGCTTGGGACCCAGACCTACATCTGCAACGTGAATCAAGCCAGCAACACCAAGGTGGACAA         |
| WPRE RP Primer             | GAAAGTTGAGCCAAATCTTGTGACAAAACCTCACACATGCCACCGTCCAGCAGCTGAACTCCTGGGGGACCGTCACTTCCCTCTCCCCCAAAAACCAAGGACCCCTCATGATCCTCCGGACCCCTGAGGTACATGCGTGG              |
|                            | TGGTGGAGCTGAGCCACGAAGACCTGAGGTCAAGTTCAACTGGTACGTGGAGCGGTGGAGTGCATAATGCCAAGACAAGCCCGGGAGGAGCAGTACAACAGCAGCTACCGTGTGGTACGCGTCTCACCCTCTGACACAGGAC            |
|                            | TGGCTGAATGGCAAGGAGTACAAGTGAAGGTTCCAAACAAAGCCCTCCAGCCCACTCAGAGAAAACATCCAAAAGCAAAGGGCAGCCCGGAGAACACAGGTGTACACCTGCCCCATCCCGGATGAGCTGACCAAGAACCA              |
|                            | GGTCAGCCTGACCTGCCTGGTCAAAGGCTTCTATCCAGCAGCATCGCCGTGGAGTGGGAGAGCAATGGGAGCCGAGAGAACAACATAAGACCCGCTCCCGTGTGGACTCCGACGGCTCTCTTCTCTACAGCAAGCTCACCG             |
|                            | TGGACAAGAGCAGGTGGCAGCAGGGGAACGTCTTCTCATGCTCCGTGATGATGAGGCTCTGCAACAACACTACACGCAAGAGAGCTCTCCCTGTCTCCGGTAAATGA] GAATTCGCGGCGCGGAGTTGATATCT [CGACAATCAA       |
|                            | CCTCTGGATTACAAAATTTGTGAAAGATTGACTGGTATCTTAACTATGTTGCTCTTTTACGCTATGTTGGATAAGCTGCTTTAATGCTCTTGTATCATGCTATTGCTTCCCGTATGGCTTTCATTTCTCCTCTTGTATAAATCCTG        |
|                            | GTTGCTGTCTCTTTATGAGGAGTTGTGCCCGTTGTGAGCAACCTGGCGTGGTGTGCACTGTGTTTGTGACGCAACCCCACTGGTGGGCACTGGCCACACTGTGACGCTCTTCCCGGACTTTTCGCTTTCCTCCCTCCCTATTG           |
|                            | CCACGGCGGAACCTATCGCCCGCTGCTTGCCTGCTGGCAGGGGCTCGCTGTTGGGCACTGACAAATCCGTTGGTGTGTCGGGGAAGCTGACGCTCTTCCATGGCTGCTCGCTGTGTGCCACCTGGATTCTGCGCGGGAGC              |
|                            | TCCTTCTGCTACGTCCTTCCGCGCTCAATCCAGCGGACCTTCTTCCCGCGGCTGCTGCGGCTCTGGGCTCTTCCGCTCTTCCGCTTCCGCTTCCGCTTCCGCTTCCGCTTCCGCTTCCGCTTCCGCTTCCGCTTCCGCTTCCGCT         |
|                            | GGAGGCTAATGAAACACGGAAGGAGACAATACCGGAAGAACCCGCGCTATGACGGCAATAAAAGACAGAATAAAACGCACGGTGTGGTGTGTTGTTTATAAACCGGGGTTCCGTTCCAGGGCTGGCCTCTGTGATACCC               |
|                            | ACCGAGACCCATTTGGGGCAATACGCCCGCTTCTTCTCTTCCACCCACCCCAAGTTCCGGTGAAGGCCAGGGCTCGACGCAACGTCGGGGCGGACGGCCCTGCCATAGC] [AGATCTGCGCAGCTGGGGCT]                     |

Linear expression cassettes For IGKC(kappa)

|                            |                                                                                                                                                                   |
|----------------------------|-------------------------------------------------------------------------------------------------------------------------------------------------------------------|
| CMV-FP Primer              | [AGATATACGCGTTGACATTG] [ATTATTGACTAGTTATTAATAGTAATCAATTACGGGGTCATTAGTTTCATAGCCCATATATGGAGTTCGCGGTACATAACTTACGGTAAATGGCCCGCTGGCTGACCGCCCAACGACCCCGCC               |
| CMV promoter               | ATTGACGTCATAATGACGTATGTTCCCATAGTAACGCCAATAGGGACTTTCATTGACGTCATATGGGTGGAGTATTTACGGTAAACTGCCCACTGGGCAGTACATCAAGTGATCATATGCCAAGTACGCCCCCTATTGACGTCAATG               |
| CMV-RP Primer              | ACGGTAAATGGCCCGCTGGCATTATGCCAGTACATGACCTTATGGGACTTTCCTACTTGGCAGTACATCTACGTATTAGTCATCGCTATTACCATTGGTGTATGCGGTTTGGCAGTACATCAATGGCGTGGATAGCGGTTGACTCA                |
| K20 Primer                 | CGGGGATTTCCAAGTCTCCACCCATTGACGTCAATGGGAGTTTGTGTTGGCACAAAATCAACGGGACTTTCAAAATGTCGTAACACTCCGCCCAATTGACGAAAATGGCGGTAGGCGTGTACGGTGGGAGTCTATATAAGCAG                   |
| hman IGHG1 Constant region | AGCTCGTTTAGTGAAACCGTCAGATCGCTGGAGACGCCATCCACCGTGTGTTGACCTCCA) TAGAAGACACCGGGACCGATCCAGCTCCGGACTCTAGACTTCGAATTTCTGCGAGTCGA [CGGTACCGCGGGCCCGGGA] [2nd-PCR          |
| WPRE                       | <b>product</b> ] [CGAATCTGGCTGCACTC] [TGTCTTCACTTCCCGCCATCTGATGAGCAGTTGAAATCTGGAACCTCCCTGCTTGTGTGCTGCTGCTTATGAGGAGTTGTGGCCGTTGTGAGGCAACCTGGCGTGGTGTGCACTGTGTTGCTG |
| poly(A) signal             | CTCCAAATCGGTAATCCAGGAGAGTGTACAGAGCAGGACAGCAAGGACAGCCTACAGCCTCAGCAGCACCTGACGCTGAGCAAGCAGACTACGAGAAAACAAGGCTACGCCCTGCCAAGTACCCATCAGGGCTGAGCTC                       |
| WPRE RP Primer             | CCCGCTCACAAAGAGCTTCAACAGGGGAGAGTGTAG] GAATTCGCGGCGCGGAGTTGATATCT [CGACAATCAACCTCTGGATTACAAAATTTGTGAAAGATTGACTGGTATCTTAACTATGTTGCTCTTTTACGCTATGTTGGAAT             |
|                            | AGCGTCTTTAAGCCCTTTGATCATGCTATGCTTCCCGTATGGCTTTCATTTTCTCCTCTGATATAAATCTGGTGTGCTCTTATGAGGAGTTGTGGCCGTTGTGAGGCAACCTGGCGTGGTGTGCACTGTGTTGCTG                          |
|                            | GCAACCCCACTGGTGGGCACTGGCCACACTGTGACGCTCTTCCCGGACTTTTCGCTTTCCTCCCTCCCTATTGCCACCGGGAACCTATCGCCGCTGCTTCCCGCTGCTGGCAGGGGCTCGGCTGTGGGCACTGACAAATTC                     |
|                            | CGTGGTGTGTCGGGGAAGCTGACGCTCTTCCATGGCTGCTCGCTGTGTCGCCACCTGGATTCTGCGCGGGAGCTCTTCTGCTACGCTCCCTTCCGCGCTCAATCCAGCGGACCTTCTCCCGCGGCTGCTGCGCGGCTTCCGCGG                  |
|                            | CTCTTCCCGCTTCCGCTTCCGCTCAGACGAGTCGGATCTCCCTTTGGGCGGCTCCCGCTGG] [AAACGGGGAGGCTAATGAAACCGGAAGGAGCAATACCGGAAGGAACCCCGCTATGACGGCAATAAAAGACAGAA                        |
|                            | TAAAACGCAAGGTTGGGTGTTGTTGTTTATAAACCGGGGTTCCGTTCCAGGGCTGGCACTCTGTCATACCCCAAGGACCCATTTGGGGCAATACGCCCGGCTTCTTCTTCCCAACCCCAAGTTCCGGTGAAG                              |
|                            | GGCCAGGGCTCGCAGCAACGTCGGGGCGGACGGCCCTGCCATAGC] [AGATCTGCGCAGCTGGGGCT]                                                                                             |

Linear expression cassettes For IGLC (lambda)

|                            |                                                                                                                                                            |
|----------------------------|------------------------------------------------------------------------------------------------------------------------------------------------------------|
| CMV-FP Primer              | [AGATATACGCGTTGACATTG] [ATTATTGACTAGTTATTAATAGTAATCAATTACGGGGTCATTAGTTTCATAGCCCATATATGGAGTTCGCGGTACATAACTTACGGTAAATGGCCCGCTGGCTGACCGCCCAACGACCCCGCC        |
| CMV promoter               | ATTGACGTCATAATGACGTATGTTCCCATAGTAACGCCAATAGGGACTTTCATTGACGTCATATGGGTGGAGTATTTACGGTAAACTGCCCACTGGGCAGTACATCAAGTGATCATATGCCAAGTACGCCCCCTATTGACGTCAATG        |
| CMV-RP Primer              | ACGGTAAATGGCCCGCTGGCATTATGCCAGTACATGACCTTATGGGACTTTCCTACTTGGCAGTACATCTACGTATTAGTCATCGCTATTACCATTGGTGTATGCGGTTTGGCAGTACATCAATGGCGTGGATAGCGGTTGACTCA         |
| L20 Primer                 | CGGGGATTTCCAAGTCTCCACCCATTGACGTCAATGGGAGTTTGTGTTGGCACAAAATCAACGGGACTTTCAAAATGTCGTAACACTCCGCCCAATTGACGAAAATGGCGGTAGGCGTGTACGGTGGGAGTCTATATAAGCAG            |
| hman IGHG1 Constant region | AGCTCGTTTAGTGAAACCGTCAGATCGCTGGAGACGCCATCCACCGTGTGTTGACCTCCA) TAGAAGACACCGGGACCGATCCAGCTCCGGACTCTAGACTTCGAATTTCTGCGAGTCGA [CGGTACCGCGGGCCCGGGA] [2nd-PCR   |
| WPRE                       | <b>product</b> ] [GGTCAGCCCAAGGCTGCCCC] [CTCGGTCACTCTGTTCCCGCTCTCTGAGGAGCTTCAAGCAACAAAGGCCACACTGGTGTGCTCATAAGTGACTTCTACCCGGGAGCCGTGACAGTGGCTTGAAGGCAGATAGC |
| poly(A) signal             | AGCCCGTCAAGCGGGAGTGGAGACCCACACCTCCAAAACAAAGCAACAAGTACCGGGCCAGCAGTATCTGAGCCTGACGCTGAGCAGTGAAGTCCACAGAAGCTACAGCTGCCAGGTACAGCATGAAGGGAGCACCTG                 |
| WPRE RP Primer             | GGAGAAGACAGTGGCCCTACAGAATGTTCAATAG] GAATTCGCGGCGCGGAGTTGATATCT [CGACAATCAACCTCTGGATTACAAAATTTGTGAAAGATTGACTGGTATCTTAACTATGTTGCTCTTTTACGCTATGTTGATACG       |
|                            | CTGCTTTAATGCTTTGATCATGCTATGCTTCCCGTATGGCTTTCATTTCTCCTCTGATATAAATCCGTTGCTGCTCTTATGAGGAGTTGTGGCCGTTGTGAGGCAACCTGGCGTGGTGTGCACTGTGTTGCTGACGCA                 |
|                            | ACCCCACTGGTGGGCACTGGCCACACTGTGACGCTCTTCCCGGACTTTTCGCTTTCCTCCCTCCCTATTGCCACGGCGGAACCTATCGCCGCTGCTTCCCGCTGCTGGCAGGGGCTCGGCTGTGGGCACTGACAAATCCGCT             |
|                            | GGTGTGTCGGGGAAGCTGACGCTCTTCCATGGCTGCTCGCTGTGTCACCTGGATTCTGCGGGGAGCTCTTCTGCTACGCTCTTCCCGCTCAATCCAGCGGACCTTCTTCCCGCGGCTGCTGCGCGGCTTCCGCGGCT                  |
|                            | TTCCGCTCTGCTTCCGCTTCCGCTCAGACGAGTCGGATCTCCCTTTGGGCGGCTCCCGCTGG] [AAACGGGGAGGCTAATGAAACCGGAAGGAGACAATACCGGAAGGAACCCCGCTATGACGGCAATAAAAGACAGAATAA            |
|                            | AACGCAAGGTTGGGTGTTGTTGTTTATAAACCGGGGTTCCGTTCCAGGGCTGGCACTCTGTCGATACCCCAAGGACCCATTTGGGGCAATACGCCCGGTTTCTTCTTCCCAACCCCAAGTTCCGGTGAAGGC                       |
|                            | CCAGGGCTCGCAGCAACGTCGGGGCGGACGGCCCTGCCATAGC] [AGATCTGCGCAGCTGGGGCT]                                                                                        |



|     |        |                 |                 |            |                            |                |              |              |
|-----|--------|-----------------|-----------------|------------|----------------------------|----------------|--------------|--------------|
| 109 | 510G4  | IGHV4-31*03 F   | IGHD4-23*01 ORF | IGHJ4*02 F | ARDYGGNSNYFHY              | IGKV1-33*01 F  | IGKJ4*01 F   | QYDITLPLT    |
| 110 | 510H4  | IGHV3-66*01 F   | IGHD5-18*01 F   | IGHJ6*02 F | AETGWDGMDV                 | IGKV3-11*01 F  | IGKJ1*01 F   | QQRSNWPGT    |
| 111 | 510A5  | IGHV3-9*01 F    | IGHD3-9*01 F    | IGHJ4*02 F | AKDRGYEILTPASFDY           | IGKV1-39*01 F  | IGKJ2*01 F   | QQSYSPPYT    |
| 112 | 510F6  | IGHV2-5*02 F    | IGHD5-18*01 F   | IGHJ4*02 F | AHSLPSKYSYSYGSFDY          | IGKV1-39*01 F  | IGKJ2*01 F   | QQSYSAPYT    |
| 113 | 510D7  | IGHV1-69*04 F   | IGHD5-18*01 F   | IGHJ4*02 F | ATGRYTYGYGYFDFY            | IGKV3-20*01 F  | IGKJ2*02 (F) | QQYSSRT      |
| 114 | 510E10 | IGHV3-23*01 F   | IGHD3-10*01 F   | IGHJ5*02 F | AKGELLWFGELLENWFDP         | IGKV1-12*01 F  | IGKJ1*01 F   | QQDSFPWT     |
| 115 | 510H10 | IGHV2-70*15 F   | IGHD6-13*01 F   | IGHJ4*02 F | ARIQRGIAADY                | IGKV1-39*01 F  | IGKJ2*02 (F) | QQSSTPRT     |
| 116 | 510B1  | IGHV5-51*01 F   | IGHD3-10*01 F   | IGHJ3*02 F | ARLPHFGSGSYGNAFDI          | IGLV1-47*01 F  | IGLJ3*02 F   | ATWDDSLTGPV  |
| 117 | 510G2  | IGHV7-4-1*02 F  | IGHD3-10*01 F   | IGHJ6*02 F | ASTVGRGSGTYGYGNYSYSMDV     | IGLV2-14*01 F  | IGLJ2*01 F   | TSYTGSSSTSVV |
| 118 | 510H7  | IGHV4-59*08 F   | IGHD6-13*01 F   | IGHJ5*02 F | ARHCPWQQLVSNWFDP           | IGKV1D-13*01 F | IGKJ4*01 F   | QQFNNFLT     |
| 119 | 510H6  | IGHV1-46*01 F   | IGHD3-3*01 F    | IGHJ6*02 F | ARTGLFLPSKGGGMDV           | IGLV2-14*01 F  | IGLJ2*01 F   | SSYTSSSLQI   |
| 120 | 510C4  | IGHV3-48*03 F   | IGHD1-26*01 F   | IGHJ4*02 F | ARDPGEWESLDLDY             | IGLV1-40*01 F  | IGLJ3*02 F   | QSYDSSLGNWV  |
| 121 | 511A1  | IGHV4-31*03 F   | IGHD6-13*01 F   | IGHJ6*02 F | AREKIRISAAAGTVYYYGMDV      | IGKV3-15*01 F  | IGKJ1*01 F   | QQYNNWPPWT   |
| 122 | 511B4  | IGHV4-59*08 F   | IGHD3-22*01 F   | IGHJ5*01 F | ASTYWDSSGYGYVDY            | IGKV1D-12*01 F | IGKJ4*01 F   | QAANSRLT     |
| 123 | 511E7  | IGHV5-51*01 F   | IGHD3-10*01 F   | IGHJ4*02 F | ALAVGRGIPTSYFDY            | IGKV1-33*01 F  | IGKJ3*01 F   | QQYHNLPIT    |
| 124 | 511G7  | IGHV3-33*01 F   | IGHD4-17*01 F   | IGHJ4*02 F | AKGGNYGDYLRGFDY            | IGKV1-33*01 F  | IGKJ4*01 F   | QQYHNVPVA    |
| 125 | 511E9  | IGHV1-18*01 F   | IGHD3-10*01 F   | IGHJ4*02 F | AREGAGLIAADY               | IGKV6-21*01 F  | IGKJ2*01 F   | HQSSSLPYT    |
| 126 | 511D11 | IGHV1-18*01 F   | IGHD2-15*01 F   | IGHJ6*02 F | AVLDYCSGGSSSSGYNYGMDV      | IGKV3-20*01 F  | IGKJ2*01 F   | QQYGRSPYT    |
| 127 | 511H11 | IGHV3-13*01 F   | IGHD6-19*01 F   | IGHJ6*03 F | VRGDHSSGWYGYTYMDV          | IGKV1-39*01 F  | IGKJ1*01 F   | QQSYSSPPWT   |
| 128 | 511D12 | IGHV3-66*01 F   | IGHD5-12*01 F   | IGHJ3*02 F | ARLDIADGAFDI               | IGKV1-9*01 F   | IGKJ5*01 F   | QLLNSFPIT    |
| 129 | 511A5  | IGHV4-31*06 F   | IGHD3-22*01 F   | IGHJ2*01 F | ARIYRGTMVVVFDLHWYFDL       | IGLV3-21*04 F  | IGLJ1*01 F   | QVWSSADHYV   |
| 130 | 511E5  | IGHV1-2*02 F    | IGHD3-16*01 F   | IGHJ2*01 F | ARDSLSFRVDWYFDL            | IGLV1-40*01 F  | IGLJ2*01 F   | NSRDSSGNTVV  |
| 131 | 511G5  | IGHV1-46*01 F   | IGHD6-6*01 F    | IGHJ4*02 F | ARDGALYSNSPTFDY            | IGLV1-47*01 F  | IGLJ3*02 F   | TTWDASRGWV   |
| 132 | 511H7  | IGHV1-46*01 F   | IGHD2-2*01 F    | IGHJ4*02 F | ARGGLVPVAVMPALDY           | IGLV1-47*01 F  | IGLJ3*02 F   | AAWDDSLSGPV  |
| 133 | 511B7  | IGHV3-23*01 F   | IGHD3-22*01 F   | IGHJ6*02 F | ARGLQYYDTSGYKDSYGYVDV      | IGLV1-47*01 F  | IGLJ3*02 F   | AAWDDSLSGPV  |
| 134 | 511B11 | IGHV3-7*03 F    | IGHD3-10*01 F   | IGHJ4*02 F | AGLFWYGGYFDY               | IGLV1-40*01 F  | IGLJ1*01 F   | QSYDRSLSVLYV |
| 135 | 59B11  | IGHV3-13*04 F   | IGHD3-3*01 F    | IGHJ6*03 F | ARGTQDRVELMVGSPYYYYMDV     | IGKV1-39*01 F  | IGKJ2*01 F   | QQSYITTMVT   |
| 136 | 59D6   | IGHV4-34*01 F   | IGHD3-22*01 F   | IGHJ4*02 F | ARHRRDYITMIVRPTRLWAFDY     | IGLV1-40*01 F  | IGKJ2*01 F   | QSSSLPYT     |
| 137 | 59A1   | IGHV3-66*01 F   | IGHD1-26*01 F   | IGHJ4*02 F | ARELPGVGGTDQ               | IGKV1-39*01 F  | IGKJ2*01 F   | QQSHSTPVT    |
| 138 | 59A2   | IGHV3-66*01 F   | IGHD2-15*01 F   | IGHJ4*02 F | ARDLPLHGDYFDY              | IGKV1-33*01 F  | IGKJ3*01 F   | QQSDNVPYT    |
| 139 | 59H6   | IGHV3-30*04 F   | IGHD2-15*01 F   | IGHJ4*02 F | ARETLGGYCNCGSCYDAGYFDY     | IGKV3-20*01 F  | IGKJ1*01 F   | QQYSSSPWT    |
| 140 | 59G12  | IGHV3-33*01 F   | IGHD3-3*01 F    | IGHJ4*02 F | ARDGVDFGMVTLFDY            | IGKV1-39*01 F  | IGKJ1*01 F   | QQSYNTPPWT   |
| 141 | 8B1E6  | IGHV4-4*02 F    | IGHD3-16*01 F   | IGHJ4*02 F | ARVQGLIDY                  | IGKV1-NL1*01 F | IGKJ2*02 (F) | QQYSSTPPRT   |
| 142 | 8B1B1  | IGHV5-51*01 F   | IGHD6-13*01 F   | IGHJ6*03 F | ASQAAGGYYYMDV              | IGKV1-39*01 F  | IGKJ1*01 F   | QQSYNILWT    |
| 143 | 8B1H12 | IGHV3-23*01 F   | IGHD4-17*01 F   | IGHJ5*02 F | AKQTDYGVGWFDP              | IGKV1-33*01 F  | IGKJ4*01 F   | QQYDNFSLT    |
| 144 | 8B1E11 | IGHV1-69*06 F   | IGHD3-10*01 F   | IGHJ4*02 F | AVLPLHSSYNWYFDFY           | IGKV3-11*01 F  | IGKJ2*01 F   | QQRSNWPPGMYT |
| 145 | 8B2F2  | IGHV2-5*02 F    | IGHD6-13*01 F   | IGHJ5*02 F | AHQRHSSNSWYSAWFDP          | IGLV1-40*01 F  | IGLJ1*01 F   | QSYDSSLGNFV  |
| 146 | 8B5A6  | IGHV3-33*01 F   | IGHD6-13*01 F   | IGHJ4*02 F | AKGGWYSSKWWYFDFY           | IGKV2-28*01 F  | IGKJ1*01 F   | MQALQMG      |
| 147 | 8B2D5  | IGHV3-13*01 F   | IGHD4-17*01 F   | IGHJ3*02 F | ARGSDTVTTAFDI              | IGKV1-39*01 F  | IGKJ4*01 F   | QQSYTTPGLT   |
| 148 | 8B2H8  | IGHV3-53*04 F   | IGHD3-10*01 F   | IGHJ4*02 F | AREAPNSRSGSNTFDY           | IGKV1-39*01 F  | IGKJ2*01 F   | QQSSTPPYT    |
| 149 | 8B2D11 | IGHV3-33*01 F   | IGHD5-18*01 F   | IGHJ4*02 F | AKNGYSYAYPRQYFDY           | IGKV1-33*01 F  | IGKJ2*02 (F) | QHYDNLKVT    |
| 150 | 8B2E4  | IGHV4-31*03 F   | IGHD3-10*01 F   | IGHJ4*02 F | ARVSRYTMRGVIFDY            | IGLV2-23*02 F  | IGLJ2*01 F   | CLYAGHSTYVV  |
| 151 | 8B2G6  | IGHV4-38-2*02 F | IGHD2-21*02 F   | IGHJ4*02 F | ARVGVATILGVYD              | IGLV6-57*03 F  | IGLJ3*02 F   | QSYDSSWV     |
| 152 | 8B2E12 | IGHV3-30*03 F   | IGHD6-19*01 F   | IGHJ6*02 F | AKGGYISAWSTRYYAMDV         | IGLV2-14*01 F  | IGLJ3*02 F   | SSYTSSTWV    |
| 153 | 8B3E9  | IGHV3-23*01 F   | IGHD6-13*01 F   | IGHJ4*02 F | AESSLTGNFNY                | IGLV3-21*03 F  | IGLJ3*02 F   | QVWDTAWV     |
| 154 | 8B5A1  | IGHV3-13*01 F   | IGHD5-18*01 F   | IGHJ4*02 F | ARGFDDTTGFYFDY             | IGKV1-NL1*01 F | IGKJ1*01 F   | QQDYNFPWT    |
| 155 | 8B5B6  | IGHV1-69*04 F   | IGHD3-10*01 F   | IGHJ6*03 F | ARTEYSYDSGSSRAYSMV         | IGKV1-39*01 F  | IGKJ1*01 F   | QQTHSTPRT    |
| 156 | 8B5E5  | IGHV7-4-1*02 F  | IGHD6-13*01 F   | IGHJ5*02 F | ARVPSSSWPS                 | IGKV1-39*01 F  | IGKJ1*01 F   | QQSYSTPRT    |
| 157 | 8B5C1  | IGHV3-33*01 F   | IGHD6-13*01 F   | IGHJ4*02 F | AKGGWYSSKWWYFDFY           | IGKV2-28*01 F  | IGKJ1*01 F   | MQALQMG      |
| 158 | 8B5F7  | IGHV3-7*01 F    | IGHD3-3*01 F    | IGHJ4*02 F | ARDLGLVWFGDYP              | IGKV1-NL1*01 F | IGKJ1*01 F   | QQYYSAPRT    |
| 159 | 8B4G4  | IGHV2-5*02 F    | IGHD3-9*01 F    | IGHJ4*02 F | AHSPDHRYFDVLTGYFNSERFYFDY  | IGLV1-51*01 F  | IGLJ2*01 F   | GTWDDSSLAGV  |
| 160 | 8B4A7  | IGHV4-39*07 F   | IGHD6-6*01 F    | IGHJ6*02 F | ARIPRHLGQDHYYYVMDV         | IGLV2-23*01 F  | IGLJ1*01 F   | CSYAGIFV     |
| 161 | 8B4D9  | IGHV3-30*03 F   | IGHD5-18*01 F   | IGHJ4*02 F | AKAAGGGYSYIYWGDDY          | IGLV6-57*03 F  | IGLJ3*02 F   | QSYDSSNLWV   |
| 162 | 8B4E1  | IGHV4-61*01 F   | IGHD2-2*01 F    | IGHJ6*02 F | AREYFVSLPAAQTLYYYGIDV      | IGKV3-15*01 F  | IGKJ1*01 F   | QQYKNWPPWT   |
| 163 | 8B4H2  | IGHV1-8*02 F    | IGHD3-10*01 F   | IGHJ5*02 F | ARGLWFGDLTRTKYNWFDP        | IGKV3-20*01 F  | IGKJ4*01 F   | HOYDSSPLT    |
| 164 | 8B4A3  | IGHV1-46*01 F   | IGHD3-10*01 F   | IGHJ6*02 F | ARDPSSNYNDIDEWTRSENHNYGMDA | IGKV3-11*01 F  | IGKJ4*01 F   | QQRSNWPPYLT  |
| 165 | 8B4C5  | IGHV3-11*06 F   | IGHD6-19*01 F   | IGHJ4*02 F | ARDGSAVAGPMSYFDY           | IGKV1-NL1*01 F | IGKJ1*01 F   | QQYYSIPRT    |
| 166 | 8B4E5  | IGHV2-70*15 F   | IGHD6-19*01 F   | IGHJ4*02 F | AREVAGAVHLDY               | IGKV1-39*01 F  | IGKJ1*01 F   | QQSFSTPRT    |
| 167 | 8B4B6  | IGHV3-7*03 F    | N.D.            | IGHJ4*02 F | ARDLGLVWFGDLLF             | IGKV1-NL1*01 F | IGKJ1*01 F   | QQYSDPPRT    |
| 168 | 8B4E11 | IGHV4-59*01 F   | IGHD3-10*01 F   | IGHJ4*02 F | ARGGYYGPPRDFDY             | IGKV3-20*01 F  | IGKJ2*01 F   | QHYGSSPQYT   |
| 169 | 13G9   | IGHV1-58*01 F   | IGHD2-2*01 F    | IGHJ3*02 F | AAPYCSSTSCRDFDI            | IGKV3-20*01 F  | IGKJ1*01 F   | QQYGRSPWT    |
