23 **Abstract**

24 Neutralizing antibodies (Abs) have been considered as promising therapeutics for the prevention and  
25 treatment of pathogens. After the outbreak of COVID-19, potent neutralizing Abs to SARS-CoV-2 were  
26 promptly developed, and a few of those neutralizing Abs are being tested in clinical studies. However,  
27 there were few methodologies detailedly reported on how to rapidly and efficiently generate neutralizing  
28 Abs of interest. Here, we present a strategically optimized method for precise screening of neutralizing  
29 monoclonal antibodies (mAbs), which enabled us to identify SARS-CoV-2 receptor-binding domain  
30 (RBD) specific Abs within 4 days, followed by another 2 days for neutralization activity evaluation. By  
31 applying the screening system, we obtained 198 Abs against the RBD of SARS-CoV-2. Excitingly, we  
32 found that approximately 50% (96/198) of them were candidate neutralizing Abs in a preliminary  
33 screening of SARS-CoV-2 pseudovirus and 20 of these 96 neutralizing Abs were confirmed with high  
34 potency. Furthermore, 2 mAbs with the highest neutralizing potency were identified to block authentic  
35 SARS-CoV-2 with the half-maximal inhibitory concentration ( $IC_{50}$ ) at concentrations of 9.88 ng/ml and  
36 11.13 ng/ml. In this report, we demonstrated that the optimized neutralizing Abs screening system is  
37 useful for the rapid and efficient discovery of potent neutralizing Abs against SARS-CoV-2. Our study  
38 provides a methodology for the generation of preventive and therapeutic antibody drugs for emerging  
39 infectious diseases.

## 40 **Introduction**

41 Pandemic outbreaks of infectious diseases, such as three novel pathogenic human coronaviruses in the  
42 past two decades: severe acute respiratory syndrome coronavirus 2 (SARS-CoV-2), middle eastern  
43 respiratory syndrome coronavirus (MERS-CoV) and SARS-CoV, have caused high mortality and  
44 unprecedented social and economic consequences<sup>1-4</sup>. While vaccines are effective in blocking infectious  
45 diseases, antibody therapy is an alternative treatment strategy for preventing newly emerging viruses.  
46 During the outbreaks of SARS-CoV, MERS-CoV and SARS-CoV-2, convalescent plasma from these  
47 patients containing neutralizing mAbs was a safe and effective treatment option to reduce mortality in  
48 severe cases<sup>5,6</sup>. However, convalescent plasma are limited and polyclonal non-neutralizing Abs in the  
49 plasma may cause undesired side effects<sup>7</sup>. The neutralizing mAbs therapeutics are effective replacements  
50 of convalescent plasma therapy. A rapid and efficient neutralizing Abs screening method against  
51 infectious diseases is in great needs.

52 The outbreak of COVID-19 was caused by SARS-CoV-2. Its viral spike(S) containing the receptor-  
53 binding domain (RBD) is responsible for binding to the receptor angiotensin-converting enzyme-  
54 2(ACE2) receptor on the host cells<sup>8,9</sup>. To date, several teams have promptly developed some potent  
55 neutralizing mAbs to SARS-CoV-2<sup>10-22</sup>. In these studies, different methodologies were employed for  
56 screening of neutralizing Abs. Some studies utilized SARS-CoV-2 S - or RBD- labeled memory B cells  
57 from convalescent patients with SARS-CoV-2 infection and directly amplified Ab genes by RT-PCR  
58 and nested PCR at a single-cell level<sup>10,18</sup>. In other studies, plasma cells were activated and expanded with  
59 stimulators and cytokines in vitro for selecting neutralizing Abs<sup>14,19</sup>. Humanized mice were also used to  
60 generate full human monoclonal antibodies against S protein<sup>11,22</sup>. Furthermore, using single-cell  
61 sequencing technology in combination with the enrichment of antigen-specific B, some researchers  
62 quickly detected thousands of antigen specific mAbs sequences<sup>17,21</sup>. Although these studies showed that  
63 neutralizing antibodies against SARS-CoV-2 could be obtained from convalescence patients, few  
64 methodologies were reported in detail about how to generate neutralizing Abs of interest rapidly and  
65 efficiently.

66 Here, we describe a strategically optimized system for fast screening of neutralizing mAbs to achieve  
67 efficient and reliable yield of desired neutralizing Abs in as short as 6 days. A total of 198 Abs against  
68 RBD of SARS-CoV-2 were obtained with this method, and 50% of them were potential candidate  
69 neutralizing Abs in a preliminary screening of pseudovirus system. Furthermore, 20 of these neutralizing

70 mAbs are confirmed with high potency, and 2 mAbs reached IC<sub>50</sub> in nanogram range. Therefore, the  
71 screening system can generate a large number of neutralizing mAbs for the discovery of potent antibody  
72 drugs, providing vital information to understand the characteristics of new viruses, and, collectively, to  
73 develop preventative and therapeutic strategies for newly emerging infectious diseases in the future.

## 74 **Results**

75 **Establishment of a rapid and efficient neutralizing Abs screening system.** Previously we had  
76 obtained specific mAbs from PBMC of vaccinated volunteers via microwell array chips within only one  
77 week<sup>23</sup>. Here, we established the optimized screening system based on the memory B cells from the  
78 PBMC to obtain neutralizing mAbs rapidly and efficiently (Figure 1). At first, we collected the blood  
79 samples and isolated the PBMC from a panel of Chinese convalescent patients infected with SARS-CoV-  
80 2 in February. RBD specific memory B cells (mB cells) in a pooled PBMC from 5-7 blood samples were  
81 detected by labeling with RBD. RBD-specific mB cells were sorted into 96-well PCR plates in a single-  
82 cell manner. Each single-cell Ab cDNA was amplified, and the immunoglobulin heavy (IGH) and light  
83 chains (IGK and IGL) of the variable region were obtained by RT-PCR and nested PCR with the  
84 optimized primers at Day 1 (Table S4. Primers List of BCR PT-PCR). Recombinant sites were introduced  
85 by the nested primers during the 2<sup>nd</sup> PCR. Next, linear antibody gene expression cassettes were  
86 assembled by overlapping PCR, which contained the essential elements for Ab gene transcription,  
87 including the CMV promoter, the antibody variable region, the constant region and the poly(A) tail. Then  
88 HEK293T cells were transiently transfected with these linear antibody gene expression cassettes, for the  
89 expression of recombinant antibodies at Day 2. Culture supernatants of the transfected cells were  
90 evaluated for the S and RBD specific binding activity by enzyme-linked immunosorbent assays (ELISA)  
91 at Day 4, and their pseudovirus neutralizing capacity was tested in HEK293T/hACE2 cells at Day 6. The  
92 screening system allowed us to harvest a large number of potential neutralizing Abs against SARS-CoV-  
93 2 within only 6 days. Furthermore, recombinant antibody proteins of interest were expressed and purified  
94 for subsequent functional analysis, including antibody specific binding ability, viral neutralization and  
95 antigen-binding affinity, all of which were completed with an additional 9 days.

96 Compared with conventional methods for screening neutralizing Abs<sup>10,13,14,17,21</sup>, a few strategically  
97 optimized details of our screening system were described as following (Figure S1. The optimization of  
98 the screening platform). First, we collected the blood samples from convalescent patients with COVID-

99 19. These patients were the earliest confirmed cases of SARS-CoV-2 infection in Chongqing City, over  
100 half of the patients who had a history of close contact with the earliest infectors. Antigen specific B cells  
101 from memory B cells experienced affinity maturation and somatic hypermutation<sup>24,25</sup>. Thus, RBD  
102 specific memory B cells in these patients were potentially useful candidates to screen out the potent  
103 neutralizing Abs. Second, we sorted the CD19<sup>+</sup>IgD<sup>-</sup>IgG<sup>+</sup> memory B cells in the pooled PBMC samples  
104 from multi-patients to achieve a higher probability in antibody diversity. We then utilized RBD of SARS-  
105 CoV-2 as the bait to label the specific memory B cells. Removing dead cells was essential for sorting of  
106 the relatively rare RBD specific mB cells, which only occupied less than 1% of CD19<sup>+</sup>IgD<sup>-</sup> IgG<sup>+</sup> memory  
107 B cells (Figure S2. The influence of dead cells on the sorting of RBD-specific memory B cells).  
108 Additional improvements were applied to the single-B cell receptor (BCR) cloning<sup>26,27</sup> and expression  
109 (Figure S3. Schematic diagram of BCR RT-PCR and linear expression cassettes construction). We chose  
110 the initial 20 nucleotides located at 5' end of the signal peptide in Ab genes as the forward primers in the  
111 1<sup>st</sup> PCR step, and the adaptor primer in the 2<sup>nd</sup> PCR step. This was beneficial for reducing potential loss  
112 of BCR clones caused by SNP at the primer binding sites. Besides, the 2<sup>nd</sup> PCR products containing the  
113 adaptor primer could be used for the simultaneous construction of linear gene expression cassettes and  
114 plasmids without the extra-modification. with Ab J-region primers in the 2<sup>nd</sup> PCR, we are able to improve  
115 the recombination efficiency of linear cassettes approaching 100%. Our strategy of linear gene cassettes  
116 skipped the process of plasmid construction, which could reduce time-consuming procedures and labor,  
117 and be more suitable for a large scale of antibody screening<sup>28</sup> (Table S6. The annotation of linear antibody  
118 expression cassettes). Taken together, we optimized a methodology for the rapid and efficient  
119 identification of neutralizing Ab candidates (Figure S3A, Table S3-S6).

120 **Detection and isolation of RBD specific memory B cells.** To apply our established screening system  
121 of neutralizing Abs, we collected the plasma and PBMC from 39 convalescent patients with COVID-19  
122 admitted to Chongqing Medical University affiliated Yongchuan Hospital (Table S1. Patient Information).  
123 These convalescent plasma had been preliminarily screened for positive virus-specific binding and  
124 neutralization capacity, using a magnetic chemiluminescence enzyme immunoassay (MCLIA) and a  
125 pseudovirus-based assay<sup>29</sup>. Using ELISA assay, we confirmed that those Abs targeting Spike or  
126 recombinant RBD of SARS-CoV-2, SARS-CoV, and MERS-CoV in the plasma with 10-fold dilution.  
127 Among these convalescent patient samples, 36 plasma showed high reactivity to SARS-CoV-2 S or RBD  
128 proteins, while the other three patients had weak reactivity to these antigens (Figure 2A). Almost all

129 samples had cross-reactivity to the S1 protein of SARS-CoV and MERS-CoV with 10- or 100-fold  
130 dilution, while the healthy donor's plasma react to none of these three coronaviruses (Figure 2A). With  
131 these findings, we felt confident that all samples could be used for the specific mAb isolation.

132 Since RBD is the key domain for the SARS-CoV-2 S protein to interact with human cell surface ACE2  
133 receptor, the recombinant RBD was employed to detect the specific memory B cells via flow cytometry.  
134 We analyzed RBD-specific memory B cells by a gating strategy of Dead\_Dye-CD19<sup>+</sup>IgG<sup>+</sup>IgD<sup>-</sup>  
135 RBD<sup>+</sup> cells (Figure 2B), the proportion of which was less than 1% in IgD<sup>-</sup>IgG<sup>+</sup> memory B cells (ranging  
136 from 0.1% to 0.33%, Figure 2C). These RBD-specific mB cells were then sorted into 96-well plate one  
137 cell per well for Ab gene isolation. Immunoglobulin heavy and light chains were amplified by nested  
138 PCR from the sorted single mB cells (Figure S3B). The amplified products were cloned into linear  
139 expression cassettes to produce full-length IgG1 antibodies (Figure S3B). After three rounds of screening,  
140 a total of 497 paired heavy chains and light chains of Ab genes were obtained from the sorted RBD-  
141 specific memory B cells (Table S2. Three batches of S-RBD specific B memory cell sorting).

142 **Specificity and neutralization of Abs expressed by linear expression cassettes.** The amplified  
143 products with heavy chains and light chains of Ab genes were separately cloned into linear expression  
144 cassettes. We then transfected HEK293T cells with these linear expression cassettes to identify the  
145 specificity of these Abs. Antibodies within the supernatant of transfected HEK293T cells were screened  
146 by ELISA for their binding capability to the recombinant S1 and RBD protein of SARS-CoV-2. In total,  
147 we identified 198 RBD specific antibody genes from the 497 pair Ab genes (Figure 3A). To assess the  
148 neutralization ability of these specific antibodies, we used pseudovirus bearing SARS-CoV-2 S protein  
149 to infect 293T/hACE2 cells. Interestingly, 96 out of 198 antibodies (48.5%) showed the potential ability  
150 to block pseudovirus with an inhibitory rate of over 75% (Figure 3A), suggesting that RBD region was  
151 an ideal candidate to screen neutralizing Abs for blocking SARS-CoV-2. These results demonstrated that  
152 our screening system can rapidly and efficiently screen neutralizing Abs using patients' specific memory  
153 B cells.

154 **Sequence analysis for the diversity of RBD-specific Abs.** We then successfully sequenced 169 RBD-  
155 specific Abs. Among them, 158 (93.5%) Abs had unique patterns of distribution with various gene  
156 clusters (Figure S4. Usage and pairing of heavy and light chain for all specific antibodies). We also  
157 analyzed the distribution of heavy chain and light chain gene clusters according to neutralizing capability  
158 of mAbs tested by pseudovirus assays, as shown in Figure 3B and Figure S4A. Abs with neutralizing

159 rate over 75% to block pseudovirus were termed as potential neutralizing Abs (pote-nAbs). The almost  
160 sequenced Abs were transcribed from the IGHV1-IGHV5 for the heavy chain and IGKV1-IGKV3 and  
161 IGLV1-IGLV3 for light chain (Figure S5). We found that close to 50% of the pote-nAbs were specifically  
162 transcribed from IGHV3 for the heavy chain, and from IGKV1 for the light chain (Figure S5.  
163 Phylogenetic analysis of VH (up) and VL (down) genes for RBD-binding antibodies). Interestingly, we  
164 found that all mAbs encoded by IGHV3-66 were pote-nAbs (Figure 3B), and the IGHV3-66 family  
165 paired with IGKV1-33, IGKV1-9 and IGLV1-40 (Figure S4C). Additionally, a large number of mAbs  
166 encoded by IGKV1-39 were pote-nAbs (Figure S4A). Of note, we found that IGKV1-39 gene cluster  
167 also paired with a bundle of heavy chains to express RBD specific mAbs (Figure S4C), which was  
168 consistent with previous reports <sup>11,19</sup>.

169 The heavy chain complementarity determining region 3 (CDRH3) is the most variable region of an  
170 antibody in amino acid compositions and lengths. The average length of CDRH3 in the naive human  
171 repertoire is round 15 amino acids with a normal distribution<sup>30</sup>. We observed that the CDRH3 lengths of  
172 the specific mAbs were mainly distributed between 11-19 amino acids, while the overall CDRH3 lengths  
173 matched the skew distribution (Figure 3C). Most of the potent-Abs contained 11-16 amino acids (Figure  
174 3C). The mean CDRH3 length of isolated SARS-CoV-2 S-RBD-specific mAb cells differs substantially  
175 from that of other viral infections, such as HIV and influenza virus<sup>31,32</sup>. In terms of the CDR3 light chain  
176 (CDRL3) lengths, a range of 6 to 13 amino acids were observed, with similar skew distribution (Figure  
177 S4B).

178 **Potent neutralizing ability and antigen affinity of mAbs.** The variable regions of potential neutralizing  
179 Abs were cloned into antibody expression vectors to construct Ab plasmids. We successfully harvested  
180 73 purified mAbs, from a total of 96 potential neutralizing mAbs that were produced by transfecting  
181 Expi293F cells. When we tested the specificity of purified mAbs by ELISA, we found 65 Abs that formed  
182 tight interaction with SARS-CoV-2 S1 and SARS-CoV-2 RBD (Figure 4A). Next, these mAbs were  
183 assessed with RBD-ACE2 interaction blocking assay to confirm their neutralizing ability *in vitro*. We  
184 found that 71% of them could block the interaction between ACE2 and RBD (Figure 4B).

185 Forty-eight purified mAbs were evaluated for their neutralizing potency using the authentic SARS-CoV-  
186 2 cytopathic effect (CPE) inhibition assay, and the results were listed according to the order of inhibitory  
187 potency (Figure 5A). We successfully obtained a total of 20 antibodies that were able to completely block  
188 the authentic SARS-CoV-2 infection with the concentrations of 1 µg/ml. The top level 2 mAbs on the

189 list were termed as the most potent neutralizers (completely inhibition < 0.14  $\mu\text{g/ml}$ ), and another 18  
190 mAbs as the moderate neutralizers (0.29-1.17  $\mu\text{g/ml}$ ). The  $\text{IC}_{50}$  of the most potent neutralizers (58G6,  
191 510A5) were determined by RT-qPCR method using authentic SARS-CoV-2 virus infection. We found  
192 that the  $\text{IC}_{50}$  values of 58G6 and 510A5 were 9.98 ng/ml and 11.13 ng/ml, respectively (Figure 5B).  
193 Therefore, we tested the binding affinity of 58G6 and 510A5 to SARS-CoV-2 S-RBD via the surface  
194 plasmon resonance (SPR) assay. The measured equilibrium constant ( $K_d$ ) of 58G6 with SARS-CoV-2 S-  
195 RBD was 0.385 nM and that of 510A5 was 7.8 nM, respectively (Figure 5C). In our study, 58G6 is the  
196 best mAb with potent neutralization and high affinity against SARS-CoV-2.

## 197 **Discussion**

198 Neutralizing antibodies were considered as an ideal medicine for prophylaxis and treatment of infectious  
199 diseases<sup>33</sup>. At present, several potent neutralizing Abs to SARS-CoV-2 have been promptly developed  
200 and being tested in clinical trials (clinicaltrials.gov NCT04497987, NCT04426695 and NCT04425629)  
201 for treating COVID-19 patients<sup>12-15,17,19-21,34,35</sup>. These reports showed that even though neutralizing  
202 antibodies against SARS-CoV-2 could be obtained from convalescent patients, the success rate to  
203 discover potent neutralizing antibodies with therapeutic value remains unideal. In this study, we  
204 described a strategically optimized screening method to discover potent mAbs from a large number of  
205 potential neutralizing Abs.

206 In general, here is how researchers obtain neutralizing antibodies. Blood samples were collected from  
207 convalescent patients with SARS-CoV-2 infection, and PBMC were separated in order to isolate SARS-  
208 CoV-2 specific B cells. Then the paired heavy and light chain sequences of Ab genes were obtained either  
209 in a single-cell PCR manner<sup>10,12,15,18</sup>, or directly by high-throughput single-cell sequencing<sup>17,21</sup>. In our  
210 study, we obtained the paired Ab genes at the single-cell level, and optimized steps of a screening  
211 workflow for neutralizing Abs, we were able to obtain the most potent neutralizing Abs with high speed  
212 and efficiency.

213 Firstly, we optimized the specificity of antibody isolation to increase target neutralizing Abs probability.  
214 Because the key sites of RBD have been clearly demonstrated to be essential for ACE2 binding during  
215 SARS-CoV-2 entry<sup>8,36</sup>, we chose to sort RBD-specific memory B cells for the isolation of heavy and  
216 light chains. It has been evidenced that RBD-specific neutralizing Abs can inhibit SARS-CoV-2 entry to  
217 host cells<sup>10</sup>, we have observed similar findings with pseudovirus infection (Figure 3). Recent reports have



218 demonstrated that when SARS-CoV-2 S was used as bait to label antigen-specific mB cells, it could  
219 result in a large of undesired antibodies against over-broad antigenic sites belonging to non-RBD  
220 regions<sup>12,17</sup>. When we used RBD as bait to isolate antibodies from mB cells, we found the obtained mAbs  
221 were more effective in blocking authentic viruses (Figure 5), which might largely due to the fact that  
222 RBD was enriched with the ACE2 binding epitopes.

223 Secondly, we optimized multiple steps to improve the efficiency of nAb screening. This has been  
224 achieved by smarter primer design, application of linear expression cassettes and preliminary  
225 neutralization assay to exclude non-neutralizing Abs, and these will be discussed in detail. Initially, we  
226 designed primers targeting the initial 20 nucleotides at the 5' end of the signal peptide of Ab genes as the  
227 forward primers in the 1st PCR step. This can reduce the loss of BCR clones caused by SNP at the primer  
228 binding sites. Also, we added an adaptor primer in the 2<sup>nd</sup> PCR step. Such adaptor with the same  
229 sequences as downstream recombination sites was convenient for the next PCR and recombinant  
230 plasmids construction, which could be suitable for high-throughput screening of specific Abs. Next, we  
231 successfully constructed linear expression cassettes with heavy chains or light chains, to rapidly identify  
232 the specificity of Abs. Construction of the linear expression cassettes was much easier than plasmids,  
233 which could drastically reduce the workload and time. Moreover, the linear Ab gene expression cassettes  
234 expressed in the cell supernatants of HEK293T cells were evaluated for neutralization activity on the  
235 sixth day. Neutralizing Abs account for approximately 50% of RBD-specific Abs, as shown in Figure  
236 3A. By detecting the ability of purified mAbs to block the interaction of RBD with ACE2, we could filter  
237 out only those Abs with neutralizing activities, to be applied in the subsequent steps. Together, these  
238 optimizations allowed us to finish one round of the screening for neutralizing Abs in, as short as, 15 days.  
239 The details of this optimized steps of our established methodology are shown (Figure S3, Table S03~S05).

240 Thirdly, we used both authentic SARS-CoV-2 cytopathic effect (CPE) inhibition assay and quantitative  
241 analysis by RT-qPCR to ensure the accuracy of our findings, which lead to the successful identification  
242 of 20 potent neutralizing antibodies that can completely block authentic virus infection, at concentrations  
243 1.17  $\mu\text{g/ml}$ . And the top two antibodies (58G6 and 510A5) generated  $\text{IC}_{50}$  values at around 10  $\text{ng/ml}$ ,  
244 which were, as far as we know, two of the most potent neutralizing mAbs discovered to date.

245 Last but not least, we reduced duplicating clones by sample selection and increased the efficiency of  
246 BCR cloning by adjusting gating strategy. It has been reported that substantial mAbs clones to SARS-  
247 CoV-2 expanding in the individual patient sample is relatively common<sup>13,18</sup>. In our study, almost all RBD-

248 specific mAb clones were different from one another, while the proportion of clonal expansion was only  
249 6.5% in all sequences, as compared to approximately 20%<sup>13,18</sup>. It could result from our pooled PBMC  
250 for sorting RBD-specific memory B from 5-7 convalescent COVID-19 patients. Therefore, it is  
251 beneficial to improve sample selection by methods that can best yield diverse mAbs of interest.  
252 Furthermore, RBD-specific memory B cells were mainly sorted after removing dead cells, this process  
253 increased the efficiency of BCR cloning.

254 Such optimized screening system allowed us to efficiently generate a panel of neutralizing Abs with  
255 relatively great potency. When we analyzed the distribution of gene clusters of B cell receptor (BCR)  
256 repertoire of abundant potential neutralizing and non-neutralizing antibody sequences, a few interesting  
257 observations were found. Our results revealed that potential neutralizing Abs tended to be distributed in  
258 several gene clusters, such as VH3-66 and VH3-53 allele, etc., among which, the VH3-66 has exclusively  
259 produced neutralizing Abs. This result may be helpful in analyzing the preference distribution of  
260 neutralizing Abs in the future. Meanwhile, CDRH3 length is reported as a key factor to value the diversity  
261 of RBD specific Abs, due to the changeable amino acid composition. We found that the CDRH3 length  
262 of potential neutralizing Abs showed a skewed distribution, with an inclined length of 11-16 amino acids.  
263 It suggested that the SARS-CoV-2 antibodies were likely derived from memory B cells during the  
264 primary response to SARS-CoV-2 infection but not a recall response to SARS-CoV or MERS, even  
265 though our collected blood specimens were cross-reactive with both SARS-CoV and MERS S protein<sup>32</sup>.  
266 One additional improvement that can be integrated into our screening system is single-cell sequencing.  
267 The development of proper algorithms for neutralization evaluation with incorporation of heavy chain  
268 variable region preferences, for example, IGHV3-66, could help to precisely predict neutralizing  
269 antibody from thousands of antigen specific mAbs repertoire<sup>17,21</sup>. This might further provide desired  
270 candidates of neutralizing Abs with potential therapeutic value, with better time-efficiency and  
271 economical preferences.

272 In conclusion, we have successfully established a strategically optimized screening system of  
273 neutralizing antibodies that can generate ideal numbers of neutralizing Abs in a total period of 15 days.  
274 This methodology can open the way for the potential on-time therapeutic applications towards various  
275 emerging pathogens in the future.

## 276 **Materials and Methods**

277 **Isolation of single RBD-specific memory B cells by FACS.** PBMCs from the convalescent patients  
278 were thawed and rested overnight. The mixed samples staining as following. 2 µg/ml RBD-his in 200 µl  
279 PBS (added with 2% FBS) was mixed with the specific antibody cocktail required for staining B cell.  
280 Then these PBMCs was incubated with mixed antibodies cocktail at 4 °C for 30 min (the antibodies  
281 cocktail including FITC-anti-human CD19 antibody (Biolegend, clone: SJ25C1), BV421-anti-human  
282 IgD antibody (Biolegend, clone: IA6-2), PerCP-Cy5.5-anti-human IgG antibody (Biolegend, clone:  
283 M1310G05), APC-anti-his tag antibody (Biolegend, clone: J095G46)). Dead dye (LIVE/DEAD™  
284 Fixable Near-IR Dead Cell Stain Kit, Thermo Fisher) was added at 4 °C for 20 min. After washing the  
285 cells, the FACS analysis were performed by BD FACSAriaIII (BD Biosciences) with FSC-A versus SSC-  
286 A identifying cell population, FSC-A versus FSC-H excluding doublets. Then FSC-H versus Dead Dye  
287 was gated to remove dead cells. RBD-specific single memory B cells were gated by CD19<sup>+</sup>IgD<sup>-</sup>IgG<sup>+</sup>His<sup>+</sup>,  
288 and single-cell sorted into 96-well PCR plates (free of DNase and RNase, Bio-Rad). The Plates were  
289 stored at -80 °C until BCR Cloning. Data analysis was performed utilizing the FlowJo software (FlowJo,  
290 LLC).

291 **Amplification of single-cell BCR variable region.** Our primers for PCR were designed from leader  
292 sequences and J region sequence of immunoglobulin (Ig) annotated by the IMGT reference directory  
293 (<http://www.imgt.org/vquest/refseqh.html>). An adaptor sequence was added to the 5' end of the leader  
294 primers for the 2<sup>nd</sup> PCR. 31 leader primers (AP\_G\_leader Mix) was designed for the heavy chain of Ig,  
295 and 19 leader primers (AP\_K\_leader Mix) was used in the amplification of the kappa chain of Ig, and 21  
296 leader primers (AP\_L\_leader Mix) for the lambda chain of Ig were designed. For the initial step of RT-  
297 PCR, 5 µl of the RT\_Mix\_A was added into each well of 96 well plate containing a single B cell. Then  
298 the mixture was incubated at 65°C for 5 min and put on ice immediately for 3 min. 5 µl RT\_Mix\_B was  
299 added into each well of the plate with reaction program: 45 °C for 45 min, 70 °C for 15 min. 1 µl of RT  
300 product was moved to the well of a new 96 well plate containing 9 µl 1st\_PCR\_Mix\_Gamma  
301 /Kappa/Lamda, respectively. The PCR program for 1st PCR: 95°C for 3 min, 30 cycles of 95°C for 10  
302 sec, 55°C for 5 sec and 72°C for 1 min. 1 µl of the tenfold-diluted 1st PCR product was then added into  
303 each well of a new 96 well plate holding 9 µl 2<sup>nd</sup> PCR\_Mix\_Gamma/Kappa/Lamda, respectively. The  
304 PCR program for 2<sup>nd</sup> PCR: 95°C for 3 min, 35 cycles of 95°C for 10 sec, 55°C for 5 sec, and 72°C for 45  
305 sec. The second PCR products were further cloned into the antibody linear expression cassettes or  
306 expression vectors to express full IgG1 antibodies. PCR reaction Mix are prepared as described in Table

307 S3. All of the PCR primers are listed in Table S4 and prepared in Table S5.

308 **Generation of linear antibody expression cassettes and expression of Abs.** 2<sup>nd</sup> PCR products were  
309 used to ligate with the expression cassettes directly by overlapping PCR. The products were purified with  
310 ethanol precipitation method. Briefly, 120  $\mu$ l of absolute ethanol and 6  $\mu$ l of 3 M sodium acetate were  
311 mixed with 60  $\mu$ l of the Overlap PCR product. Then the reagents were incubated at -80 °C for 30 minutes.  
312 After centrifuging at 10,000 rpm for 20 minutes, the supernatant was discarded and the pellet adhered  
313 on the tube were rinsed with 200  $\mu$ l 70% ethanol and absolute ethanol and evaporated the ethanol at 56°C  
314 for 10 min. 40  $\mu$ l sterile water was added to dissolve the DNA pellet. After measuring the nucleic acid  
315 concentration, purified overlapping PCR products of paired heavy and light chain expression cassettes  
316 were co-transfected in HEK293T cells. The binding ability of transfected culture supernatants to SARS-  
317 CoV-2 S-RBD was tested by ELISA after 48 hours.

318 **Recombinant antibody production and purification.** For the construction of antibody expression  
319 Vectors, VH and VL 2<sup>nd</sup> PCR products were inserted separately into the linearized plasmids (pcDNA3.4)  
320 that encode constant regions of the heavy chains and light chains via a homologous recombination kit  
321 (Catalog No. C112, Vazyme). A pair of plasmids separately expressing heavy and light chain of  
322 antibodies were transiently co-transfected into Expi293<sup>TM</sup> cells (Catalog No. A14528, ThermoFisher)  
323 with ExpiFectamine<sup>TM</sup> 293 Reagent. Then the cells were cultured in shaker incubator at 120 rpm and 8%  
324 CO<sub>2</sub> at 37 °C. After 7 days, the supernatants with the secretion of antibodies were collected and captured  
325 by protein G Sepharose (GE Healthcare). The bound antibodies on the Sepharose were eluted and  
326 dialyzed into phosphate-buffered saline (PBS). The purified antibodies were used in following binding  
327 and neutralization analyses.

328 **ELISA binding assay and competitive ELISA.** 2  $\mu$ g/ml the recombinant S or RBD proteins derived  
329 from SARS-CoV-2, SARS-CoV, or MERS-CoV (Sino Biological, Beijing) were coated on 384-well  
330 plates (Corning) at 4°C overnight. Plates were blocked with blocking buffer (PBS containing 5% FBS  
331 and 2% BSA) at 37°C for 1 hour. Serially diluted convalescents' plasma or mAbs were added into the  
332 plates and incubated at 37°C for 30 min. Plates were washed with phosphate-buffered saline, 0.05%  
333 Tween-20 (PBST) and ALP-conjugated goat anti-human IgG (H+L) antibody (Thermo Fisher) was added  
334 into each well and incubated at 37°C for 1 hour. Lastly, the PNPP substrate was added, and absorbance  
335 was measured at 405 nm by a microplate reader (Thermo Fisher). For a competitive ELISA to test the  
336 effect of mAbs on blocking ACE2 binding RBD, 2  $\mu$ g/ml the recombinant ACE2 (Sino Biological,

337 Beijing) was added in 384-well plates and overnight at 4°C, followed by blocking with the blocking  
338 buffer and washing. 500 ng/ml RBD-mouse-Ig-Fc was pre-incubated with test specimen at 37°C for 1  
339 hour, followed by adding into the wells coated with ACE2 and incubated at 37°C for 1 hour. Unbound  
340 antigen were removed with washes. Then ALP-conjugated anti-mouse-Ig-Fc antibody was added into  
341 the wells and incubated at 37°C for 30 min. PNPP was added and measured as above.

342 **Pseudovirus neutralization assay.** Pseudovirus was generated as previously described<sup>37,38</sup>. HEK293T  
343 cells were transfected with psPAX2, pWPXL Luciferase, and pMD2.G plasmid encoding either SARS-  
344 CoV-2 S. The supernatants were harvested 48 hours later, filtered by 0.45 µm filter and centrifugated at  
345 300 g for 10 min to collect the supernatant and then aliquoted and stored at -80°C. The purified  
346 antibodies with serial dilution were incubated with pseudovirus at 37°C for 1 hour. The mixture of viruses  
347 and specimens was then added in a hACE2 expressing cell line (hACE2-293T cell). After 48 hours  
348 culture, the luciferase activity of infected hACE2/293T cells was measured by the Bright-Luciferase  
349 Reporter Assay System (Promega). Relative luminescence units (RLU) of Luc activity was detected  
350 using ThermoFisher LUX reader. All experiments were performed at least three times and expressed as  
351 means ± standard deviations (SDs). Half-maximal inhibitory concentrations (IC<sub>50</sub>) were calculated using  
352 the four-parameter logistic regression in GraphPad Prism 8.0.

353 **Authentic SARS-CoV-2 virus neutralization assays.** An authentic SARS-CoV-2 neutralization assay  
354 was performed in a biosafety level 3 laboratory of Fudan University. Serially diluted mAbs were  
355 incubated with authentic SARS-CoV-2 (nCoV-SH01, GenBank: MT121215.1, 100 TCID<sub>50</sub>) at 37°C for  
356 1 hour. After incubation, the mixtures were then transferred into 96-well plates, which were seeded with  
357 Vero E6 cells. After incubation at 37°C for 48 hours, each well was examined for CPE and supernatant  
358 viral RNA by RT-qPCR. For RT-qPCR, the viral RNA was extracted from the collected supernatant using  
359 Trizol LS (Invitrogen) and used as templates for RT-qPCR analysis by Verso 1-step RT-qPCR Kit  
360 (Thermo Scientific) following the manufacturer's instructions. PCR primers targeting SARS-CoV-2 N  
361 gene (nt608-706) were as followed (forward/reverse): 5'-GGGGAAGTCTCTCTGCTAGAAT-3'/5'-  
362 CAGACATTTTGCTCTCAAGCTG-3'. qRT-PCR was performed using the LightCycler 480 II PCR  
363 System (Roche) with program as followed: 50°C 15 min; 95°C 15 min; 40 cycles of 95°C 15 sec, 50°C  
364 30 sec, 72°C 30 sec.

365 **Antibody binding affinity measurement by SPR.** The affinity of antibody binding SARS-Cov-2-S-  
366 RBD was measured via the Biacore X100 platform. The CM5 chip (GE Healthcare) was coupled with

367 an anti-human IgG-Fc antibody to capture 9000 response units antibodies. Gradient concentrations of  
368 SARS-Cov-2-S-RBD (Sino Biological Inc.) were diluted (2-fold dilution, from 50 nM to 0.78 nM) with  
369 HBS-EP<sup>+</sup> Buffer (0.01 M HEPES, 0.15 M NaCl, 0.003 M EDTA and 0.05% (v/v) Surfactant P20, pH  
370 7.4), then injected into the human IgG capturing chip. The sensor surface was regenerated with 3 M  
371 magnesium chloride at the end of each cycle. The affinity was calculated using a 1:1 binding fit model  
372 in Biacore X100 Evaluation software (Version:2.0.2).

373 **Sequence analysis of antigen-specific mAb sequences.** IMGT/V-QUEST ([http://www.imgt.org/](http://www.imgt.org/IMGT_vquest/vquest)  
374 [IMGT\\_vquest/vquest](http://www.imgt.org/IMGT_vquest/vquest)) and IgBLAST (<https://www.ncbi.nlm.nih.gov/igblast/>), MIXCR ([https://mixcr](https://mixcr.readthedocs.io/en/master/)  
375 [readthedocs.io/en/master/](https://mixcr.readthedocs.io/en/master/)) and VDJtools ([https://vdjtools](https://vdjtools-doc.readthedocs.io/en/master/overlap.html)  
376 [-doc.readthedocs.io/en/master/overlap.html](https://vdjtools-doc.readthedocs.io/en/master/overlap.html))  
377 tools were used to do the VDJ analysis and annotation, germline divergence for each antibody clone. The  
378 Phylogeny tree analysis of IgG heavy and light chain variable genes was performed with MegaX  
379 (Molecular Evolutionary Genetics Analysis across computing platforms) by the Maximum Likelihood  
380 method. Abs DNA sequences were compared with each other by ClustalW (pairwise alignments) to  
381 analyze sequence similarity, and EvolView (<https://www.evolgenius.info/evolview/>) was used for the  
382 decoration of Phylogeny tree. R packages (ggplot2, pheatmap) were used for the bar chart, heatmap and  
383 Cicos plot.

383 **Ethics Statement.** The project “The application of antibody tests patients infected with SARS-CoV-2”  
384 was approved by the ethics committee of ChongQing Medical University. Informed consents were  
385 obtained from all participants.

386 **Acknowledgments:** We acknowledge the work and contribution of blood sample providers from  
387 Chongqing Medical University affiliated Yongchuan Hospital and the third affiliated Hospital of  
388 Chongqing Medical University. We also thank health donors from Chongqing Medical University. This  
389 study was supported by Chongqing Medical University fund (X4457) with the donation from Mr Yuling  
390 Feng.

### 391 **Author contributions**

392 AJ, AH conceived and designed the study, KD, CH, LD, YN offered help on collection of convalescent  
393 patient blood samples. Most of the experiments were completed by XH, TL, CH, YW, JW, RW, FG, JH,  
394 SM, YL, FL, SS, YH, QC, LL with the assistance from TN, YX, CG, HJ, YW, WX, XC, QG, GZ, CH,  
395 WK. SL, MS, YW, XH, AJ played an import role in data analysis of neutralizing Abs sequences. SL,

396 MS, YW, JW performed to generated figures and tables and take responsibility for the integrity and  
397 accuracy of data presentation. AJ, XH wrote the manuscript and SL, TL, JW and YW helped to revise it.

398 **Data availability statements** All information presented in this study will be upload soon.

399 **Conflict of interests:** We declare no competing financial interest.

400

401

402 **Figure legends**

403 **Figure 1. Schematic model depicting a rapid and efficient screening system of neutralizing Abs.**

404 Rapid neutralizing antibody screening workflows and timelines are shown, representing the multiple  
405 workflows conducted in parallel. PBMC were isolated from collected convalescent patients' blood, and  
406 the RBD-specific memory B cells in the PBMCs were sorted as single-cell via flow-cytometric sorter  
407 (day 1). Then, the IgG heavy and light chains of monoclonal antibody genes were amplified by RT-PCR  
408 on the same day. 2<sup>nd</sup> PCR products were cloned into linear expression cassettes on the second day.  
409 Antibodies were expressed by transient transfection with equal amounts of paired heavy and light chain  
410 linear expression cassettes in HEK293T cells and culture for two days. The cell supernatants in  
411 HEK293T cells were detected for the specificity of antibodies by ELISA in 384-well plates on the fourth  
412 day. The neutralizing activity of antibodies was detected with pseudovirus bearing SARS-CoV-2 S in  
413 96-well plates on the sixth day. The potential neutralization antibody expression plasmids were  
414 transfected into Exi293F cells for large-scale production of Ab proteins. The cell supernatants in Exi293F  
415 cells were collected, and antibody proteins were purified by protein G. They were further measured for  
416 the binding ability and neutralizing activity via ELISA and competitive ELISA *in vitro*. Additionally,  
417 virus neutralization assay was performed. Created with Biorender.com.

418

419 **Figure 2. Isolation of RBD-specific memory B cells using flow cytometry. A.** The heatmap depicts

420 the specificity of convalescent patients' plasma against S1 and RBD from SARS-CoV-2, SARS-CoV  
421 and MERS-CoV, measured by ELISA. Serial dilutions of plasma samples were performed to test the  
422 reactivity of antibodies in plasma. The plasma of healthy donors was used as the control. Data were  
423 shown with the mean of representative experiments. **B.** Gating strategy for SARS-CoV-2 RBD-specific  
424 IgG<sup>+</sup> B cells in PBMCs of the convalescent patients. Living CD19<sup>+</sup> IgD<sup>-</sup>IgG<sup>+</sup> cells were gated, and cells  
425 with positive RBD staining were selected for single-cell sorting. **C.** FACS analysis of RBD-specific  
426 memory B cells in CD19<sup>+</sup>IgD<sup>-</sup>IgG<sup>+</sup> memory B cells from PBMCs of three batch convalescent patients.  
427 Plots show CD19<sup>+</sup>IgD<sup>-</sup>IgG<sup>+</sup>RBD<sup>+</sup> populations using gating strategy described in **B.**

428

429 **Figure 3. Identification of RBD specific monoclonal antibodies from convalescent COVID-19**

430 **patients. A.** Screening of specific Abs against SARS-CoV-2 S1 and RBD. The heatmap reveals that the  
431 binding ability of 198 Ab supernatants produced by HEK239T cells transfected with linear Ab gene



432 expression cassette. The mAbs rank as the screening sequence, and binding activity of mAbs against  
433 SARS-CoV-2 S1 and RBD were tested by ELISA. The brightness of blue represents the binding strength,  
434 which reflected the OD<sub>405 nm</sub> value tested by ELISA. The neutralizing activity of mAbs was discriminated  
435 according to the neutralizing value. Antibody-mediated blocking of luciferase-encoding SARS-CoV-2  
436 typed pseudovirus transfected into hACE2/ HEK293T cells were measured by values of relative light  
437 units (RUL) . The Green columns indicate potential neutralization (neutralizing activity >75%), while  
438 white indicate partial or not neutralization (neutralizing activity <75%). **B.** Frequencies of variable region  
439 of heavy chain (VH) gene clusters for potential neutralizing and non-neutralizing antibodies. Clonal  
440 sequences groups were collapsed and treated as one sample for calculation of the frequencies. **C.**  
441 Frequency of various the heavy chain complementarity determining region 3 (CDRH3) length of in  
442 potential neutralizing and non-neutralizing antibodies.

443

444 **Figure 4. The binding activity and inhibition of ACE2-RBD interaction of mAbs tested by ELISA**  
445 **and competitive ELISA. A.** The OD<sub>405 nm</sub> value reflects a binding strength of purified mAbs to 1 µg/ml  
446 SARS-CoV-2 S1 or RBD. Plates were coated with recombinant S1 or RBD protein of SARS-CoV-2,  
447 then incubated with purified mAbs. A SARS specific mAb (CR3022) was set as the positive control. The  
448 blue dashed lines indicated the OD<sub>405nm</sub> value of a negative sample. **B.** The inhibitory effect of purified  
449 mAbs against the interaction between SARS-CoV-2 RBD and hACE2 was tested via competitive ELISA  
450 analysis. Blocking efficacy was determined by comparing response units with and without prior antibody  
451 incubation. The green dashed lines indicated 50% inhibition on blocking the interaction ACE2 and RBD  
452 interaction.

453

454 **Figure 5. Functional characteristics of neutralizing Abs against SARS-CoV-2. A.** Neutralization  
455 activity of mAbs against authentic SARS-CoV-2 virus (nCoV-SH01) were analyzed by Cytopathic  
456 effects (CPE) test. Serial dilutions of mAbs were tested in parallel against authentic SARS-CoV-2,  
457 ranging from 18.76 µg/ml to 0.14 µg/ml. CPE results was summarized in (A) where "++++" indicates  
458 100% cytopathy, "+++" indicates 50-75%, "++" indicates 25-50%, "+" indicates <25% and "-" indicates  
459 no cytopathy. 13G9 was marked "\*", which was obtained by the method previously described<sup>23</sup>. **B.** The  
460 neutralization activity of 58G6 and 510A5 against the authentic SARS-CoV-2 virus was determined in  
461 Vero-E6 cells by RT-qPCR. Dashed lines indicated a 50% reduction in viral infectivity. Data were shown

462 as mean  $\pm$  SD of representative experiments. **C.** Binding kinetics of isolated mAbs with SARS-CoV-2  
463 RBD were measured by Surface Plasmon Resonance (SPR). The purified antibody was captured onto  
464 the CM5 sensor chip, followed by the injection of soluble SARS-CoV-2 RBD at five different  
465 concentrations. The experimental data of 58G6 and 510A5 were shown in the top and bottom figures in  
466 **C** respectively. The results presented are representatives of two independent experiments.

467

468 **Figure S1. The optimization of the screening platform. A.** The conventional screening of neutralizing  
469 antibodies. Antigen-specific B cells from PBMCs were sorted on day 1. The single-cell BCR genes were  
470 amplified by PCR on day 2. The antibody expression vectors were constructed in the next three days,  
471 including the PCR product sequencing, the primer synthesis, the ligation of genes and vectors, the DNA  
472 transformation and the plasmid extraction. The purified plasmids were transfected into HEK293T cells  
473 on day 5. After 48 hours, the cell supernatants were collected and analyzed with specific antigens by  
474 ELISA. Specific antibodies are used for following antibody expression and purification. Purified  
475 antibodies were screened as neutralizing candidates. **B.** The key parameters affecting screening  
476 efficiency. The following steps of the screening processes were carefully modified: multi-step sorting  
477 for the individual samples or the pooled samples, labeling S or S-RBD specific B cells, expressing  
478 antibodies using linear expression cassettes or plasmids, and designing preferred primers for the single-  
479 cell BCR cloning. To reduce time-consuming and workload, it is the critical step to screen neutralizing  
480 antibodies during the initial screening in the sixty days. Two methods for neutralization evaluation,  
481 competitive ELISA method in 3 hours or pseudovirus assay for 48 hours, were used side by side for  
482 confirmation of nAb neutralizing capability. **C.** The optimized strategy of neutralizing antibodies  
483 development. One day after PBMC thawing, specific B cell sorting was performed on day 1. A single  
484 BCR gene was cloned on day 2, using the 2<sup>nd</sup> PCR product to construct the linear expression cassettes,  
485 which were termed as the transfection targets to be introduced directly into HEK293T cells with liposome,  
486 without constructing plasmid, to shorten the screening duration. After 48 hours, the supernatants of each  
487 transfected samples were harvested and analyzed via ELISA and pseudovirus neutralization assay for  
488 evaluating specificity and neutralization.

489

490 **Figure S2. The influence of dead cells on the sorting of RBD-specific memory B cells.** Gating strategy  
491 to remove dead cells: SSC-A versus FSC-A selected cell populations, then FSC-A versus FSC-H

492 excluded doublets and FSC-H versus Dead Dye removed dead cells. Memory B cells were gated by  
493 CD19<sup>+</sup>IgD<sup>-</sup>IgG<sup>+</sup> Cells (A), without removing dead cells in the gating strategy (B).

494

495 **Figure S3. Schematic diagram of BCR RT-PCR and linear expression cassettes construction. A.**

496 Schema depicting workflow of the constructed linear expression cassettes. PCR amplified the variable

497 region genes in single B cells. The BCR cDNAs was obtained from RBD-specific memory B cell by RT-

498 PCR and the linear expression cassettes were amplified via three rounds of PCR. A primary PCR utilized

499 gene-specific primers at both the 5' and 3' ends. The 5' oligonucleotides bound the leader sequence (L).

500 The 3' reverse primer was connected with heavy or light constant regions. In the secondary PCR, a 5'

501 forward primer annealed to an "adapter", which was encoded at the 5' end of the first PCR product,

502 were used in combination with a 3' reverse primer annealing to the J gene of Ab variable region. The

503 secondary oligonucleotides provided 20 base-pair overlap regions: at the 5' end with human

504 cytomegalovirus (CMV) promoter fragment, and at the 3' end with a heavy or light chain constant region

505 fragment containing a polyadenylation sequence. Then, in a tertiary PCR, the DNAs of variable region,

506 the CMV promoter fragment, and the constant region fragments were combined and amplified to produce

507 two separate linear expression cassettes. B. The amplified products from BCR cDNAs were

508 electrophoresed and stained with ethidium bromide. (a) Agarose gel of variable region BCR genes. Lane

509 "M", 2 kb DNA ladder, Lane 1-24, heavy chain variable region and Lane 25-48, light chain variable

510 region. (b) Agarose gel of linear expression cassettes. Lane "M", 5 kb DNA ladder, Lane 1-24, the linear

511 expression cassettes of heavy chains and Lane 25-48, the linear expression cassettes of light chains.

512

513 **Figure S4. Usage and pairing of heavy and light chains for all specific antibodies. A.** Frequencies of

514 variable light chain gene (VL) clusters for neutralizing (activity > 75%) and potential non-neutralizing

515 (activity < 75%) antibodies. V gene segments were ranked by frequencies of neutralizing Abs. B.

516 Frequencies of various CDRL3 length of potential neutralizing and non-neutralizing antibodies. C.

517 Clonal expanded heavy and light clusters were paired and highlighted in different colors.

518

519 **Figure S5. Phylogenetic analysis of VH (up) and VL (down) genes for RBD-binding antibodies.**

520 Clonal expanded VH and VL clusters were paired and highlighted in various colors. The red stars

521 represented individual neutralizing antibodies. Branch lengths were drawn to scale so that sequence  
522 relatedness could be readily assessed.

523 **References**

- 524 1. de Wit, E. , et al. SARS and MERS: recent insights into emerging coronaviruses. *Nature*  
525 *Reviews Microbiology* 14, 523-534 (2016).
- 526 2. Cummings, M.J., et al. Epidemiology, clinical course, and outcomes of critically ill adults with  
527 COVID-19 in New York City: a prospective cohort study. *The Lancet* 395, 1763-1770 (2020).
- 528 3. Chen, N., et al. Epidemiological and clinical characteristics of 99 cases of 2019 novel  
529 coronavirus pneumonia in Wuhan, China: a descriptive study. *Lancet (London, England)* 395,  
530 507-513 (2020).
- 531 4. Wang, C., Horby, P.W., Hayden, F.G. & Gao, G.F. A novel coronavirus outbreak of global health  
532 concern. *The Lancet* 395, 470-473 (2020).
- 533 5. Mair-Jenkins, J., et al. The effectiveness of convalescent plasma and hyperimmune  
534 immunoglobulin for the treatment of severe acute respiratory infections of viral etiology: a  
535 systematic review and exploratory meta-analysis. *The Journal of infectious diseases* 211, 80-90  
536 (2015).
- 537 6. Ko, J.H., et al. Challenges of convalescent plasma infusion therapy in Middle East respiratory  
538 coronavirus infection: a single centre experience. *Antiviral therapy* 23, 617-622 (2018).
- 539 7. Iwasaki, A. & Yang, Y. The potential danger of suboptimal antibody responses in COVID-19.  
540 *Nature Reviews Immunology* 20, 339-341 (2020).
- 541 8. Walls, A.C., et al. Structure, Function, and Antigenicity of the SARS-CoV-2 Spike Glycoprotein.  
542 *Cell* 181, 281-292.e286 (2020).
- 543 9. Hoffmann, M., et al. SARS-CoV-2 Cell Entry Depends on ACE2 and TMPRSS2 and Is Blocked  
544 by a Clinically Proven Protease Inhibitor. *Cell* 181, 271-280.e278 (2020).
- 545 10. Wu, Y., et al. A noncompeting pair of human neutralizing antibodies block COVID-19 virus  
546 binding to its receptor ACE2. *Science* 368, 1274-1278 (2020).
- 547 11. Hansen, J., et al. Studies in humanized mice and convalescent humans yield a SARS-CoV-2  
548 antibody cocktail. *Science* (2020).
- 549 12. Chi, X., et al. A neutralizing human antibody binds to the N-terminal domain of the Spike  
550 protein of SARS-CoV-2. *Science* 369, 650-655 (2020).
- 551 13. Brouwer, P.J.M., et al. Potent neutralizing antibodies from COVID-19 patients define multiple  
552 targets of vulnerability. *Science* 369, 643-650 (2020).
- 553 14. Zost, S.J., et al. Potently neutralizing and protective human antibodies against SARS-CoV-2.  
554 *Nature* (2020).
- 555 15. Shi, R., et al. A human neutralizing antibody targets the receptor-binding site of SARS-CoV-2.  
556 *Nature* 584, 120-124 (2020).
- 557 16. Pinto, D., et al. Cross-neutralization of SARS-CoV-2 by a human monoclonal SARS-CoV  
558 antibody. *Nature* 583, 290-295 (2020).
- 559 17. Liu, L., et al. Potent neutralizing antibodies against multiple epitopes on SARS-CoV-2 spike.  
560 *Nature* (2020).
- 561 18. Ju, B., et al. Human neutralizing antibodies elicited by SARS-CoV-2 infection. *Nature* 584, 115-  
562 119 (2020).
- 563 19. Zost, S.J., et al. Rapid isolation and profiling of a diverse panel of human monoclonal antibodies  
564 targeting the SARS-CoV-2 spike protein. *Nat Med* (2020).
- 565 20. Wang, C., et al. A human monoclonal antibody blocking SARS-CoV-2 infection. *Nat Commun*  
566 11, 2251 (2020).

- 567 21. Cao, Y., et al. Potent Neutralizing Antibodies against SARS-CoV-2 Identified by High-  
568 Throughput Single-Cell Sequencing of Convalescent Patients' B Cells. *Cell* 182, 73-84 e16  
569 (2020).
- 570 22. Baum, A., et al. Antibody cocktail to SARS-CoV-2 spike protein prevents rapid mutational  
571 escape seen with individual antibodies. eabd0831 (2020).
- 572 23. Jin, A., et al. A rapid and efficient single-cell manipulation method for screening antigen-  
573 specific antibody-secreting cells from human peripheral blood. *Nat Med* 15, 1088-1092 (2009).
- 574 24. Akkaya, M., Kwak, K. & Pierce, S.K. B cell memory: building two walls of protection against  
575 pathogens. *Nature Reviews Immunology* 20, 229-238 (2020).
- 576 25. Phan, T.G. & Tangye, S.G. Memory B cells: total recall. *Current opinion in immunology* 45,  
577 132-140 (2017).
- 578 26. Tiller, T., et al. Efficient generation of monoclonal antibodies from single human B cells by  
579 single cell RT-PCR and expression vector cloning. *J Immunol Methods* 329, 112-124 (2008).
- 580 27. Smith, K., et al. Rapid generation of fully human monoclonal antibodies specific to a  
581 vaccinating antigen. *Nat Protoc* 4, 372-384 (2009).
- 582 28. Liao, H.X., et al. High-throughput isolation of immunoglobulin genes from single human B  
583 cells and expression as monoclonal antibodies. *J Virol Methods* 158, 171-179 (2009).
- 584 29. Long, Q.-X., et al. Antibody responses to SARS-CoV-2 in patients with COVID-19. *Nature*  
585 *Medicine* 26, 845-848 (2020).
- 586 30. Briney, B., Inderbitzin, A., Joyce, C. & Burton, D.R. Commonality despite exceptional diversity  
587 in the baseline human antibody repertoire. *Nature* 566, 393-397 (2019).
- 588 31. Wu, N.C., et al. In vitro evolution of an influenza broadly neutralizing antibody is modulated  
589 by hemagglutinin receptor specificity. *Nature Communications* 8, 15371 (2017).
- 590 32. Yu, L. & Guan, Y. Immunologic Basis for Long HCDR3s in Broadly Neutralizing Antibodies  
591 Against HIV-1. *Front Immunol* 5, 250 (2014).
- 592 33. Jiang, S., Hillyer, C. & Du, L. Neutralizing Antibodies against SARS-CoV-2 and Other Human  
593 Coronaviruses. *Trends in Immunology* 41, 355-359 (2020).
- 594 34. Kreer, C., et al. Longitudinal Isolation of Potent Near-Germline SARS-CoV-2-Neutralizing  
595 Antibodies from COVID-19 Patients. *Cell* (2020).
- 596 35. Tian, X., et al. Potent binding of 2019 novel coronavirus spike protein by a SARS coronavirus-  
597 specific human monoclonal antibody. *Emerg Microbes Infect* 9, 382-385 (2020).
- 598 36. Yan, R., et al. Structural basis for the recognition of SARS-CoV-2 by full-length human ACE2.  
599 *Science* 367, 1444-1448 (2020).
- 600 37. Ou, X., et al. Characterization of spike glycoprotein of SARS-CoV-2 on virus entry and its  
601 immune cross-reactivity with SARS-CoV. *Nature Communications* 11, 1620 (2020).
- 602 38. Nie, J., et al. Establishment and validation of a pseudovirus neutralization assay for SARS-CoV-  
603 2. *Emerging Microbes & Infections* 9, 680-686 (2020).
- 604

**Figure 1**

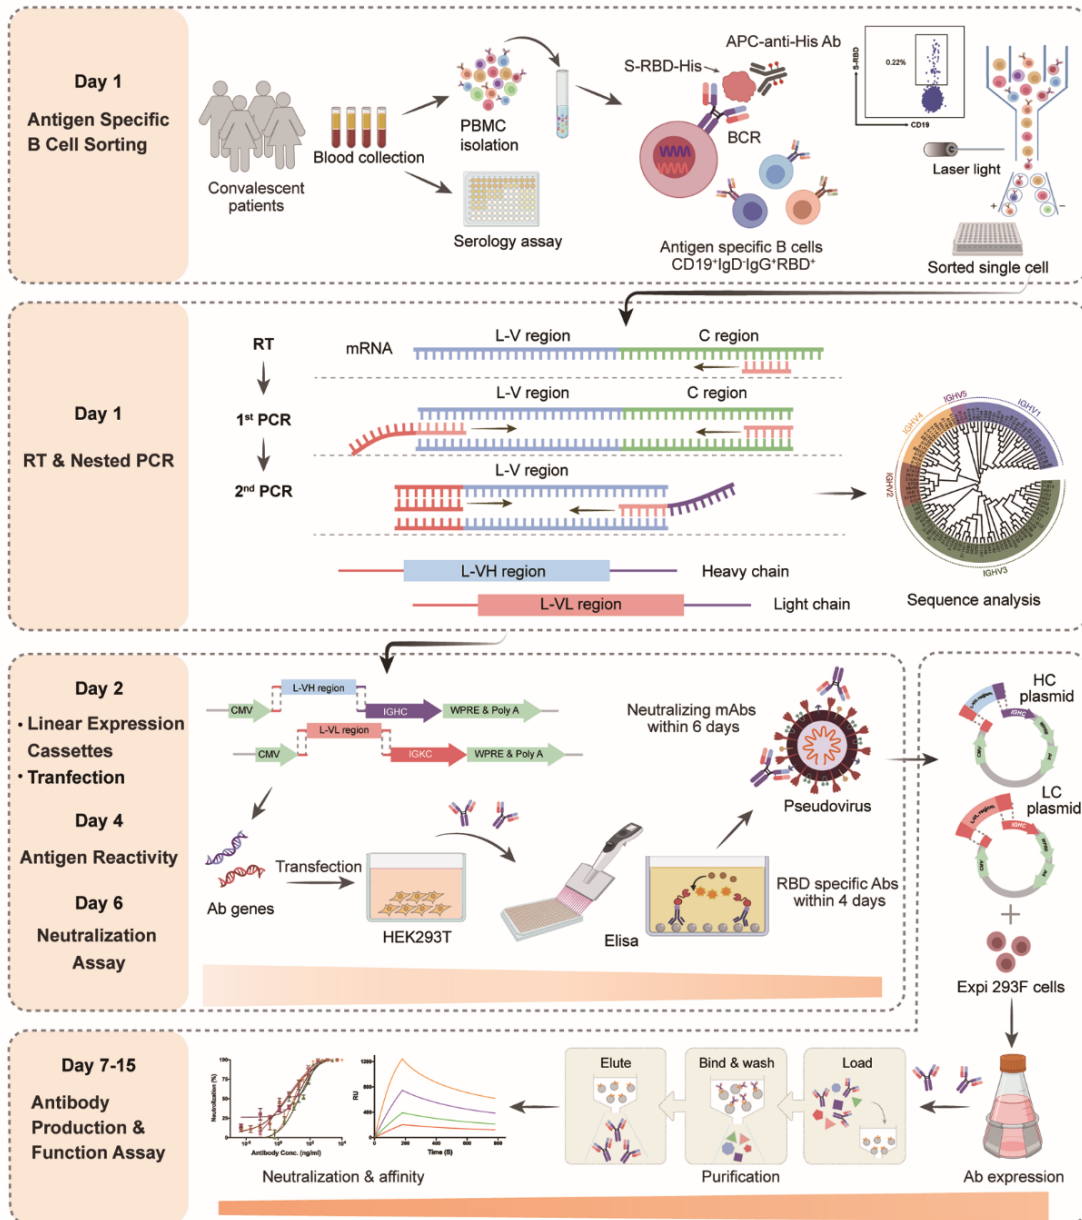

Figure 2

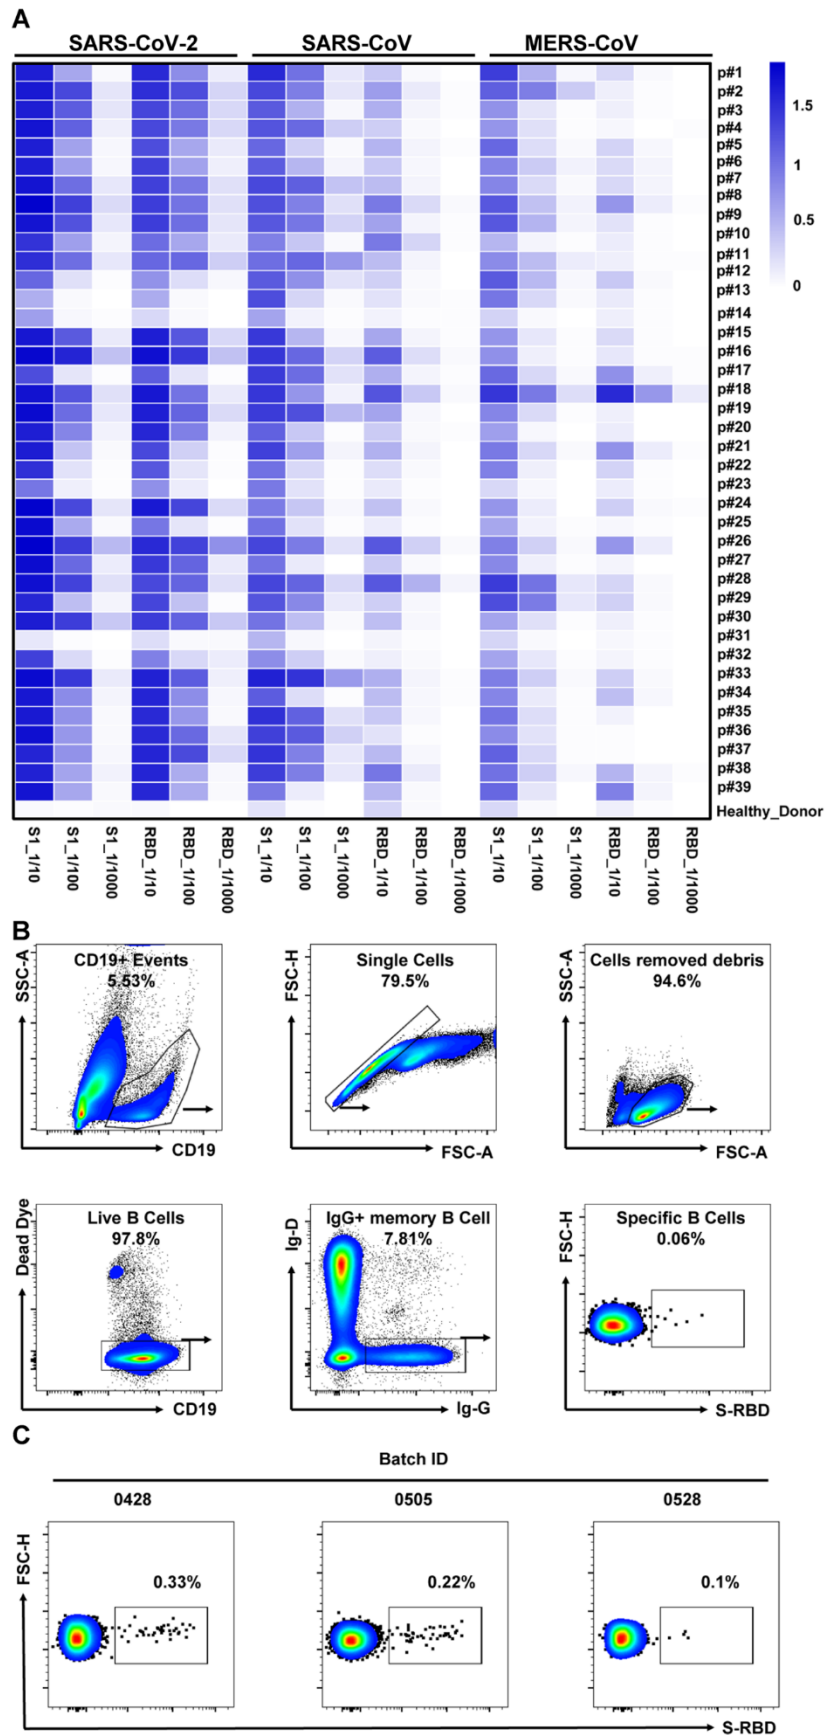



Figure 3

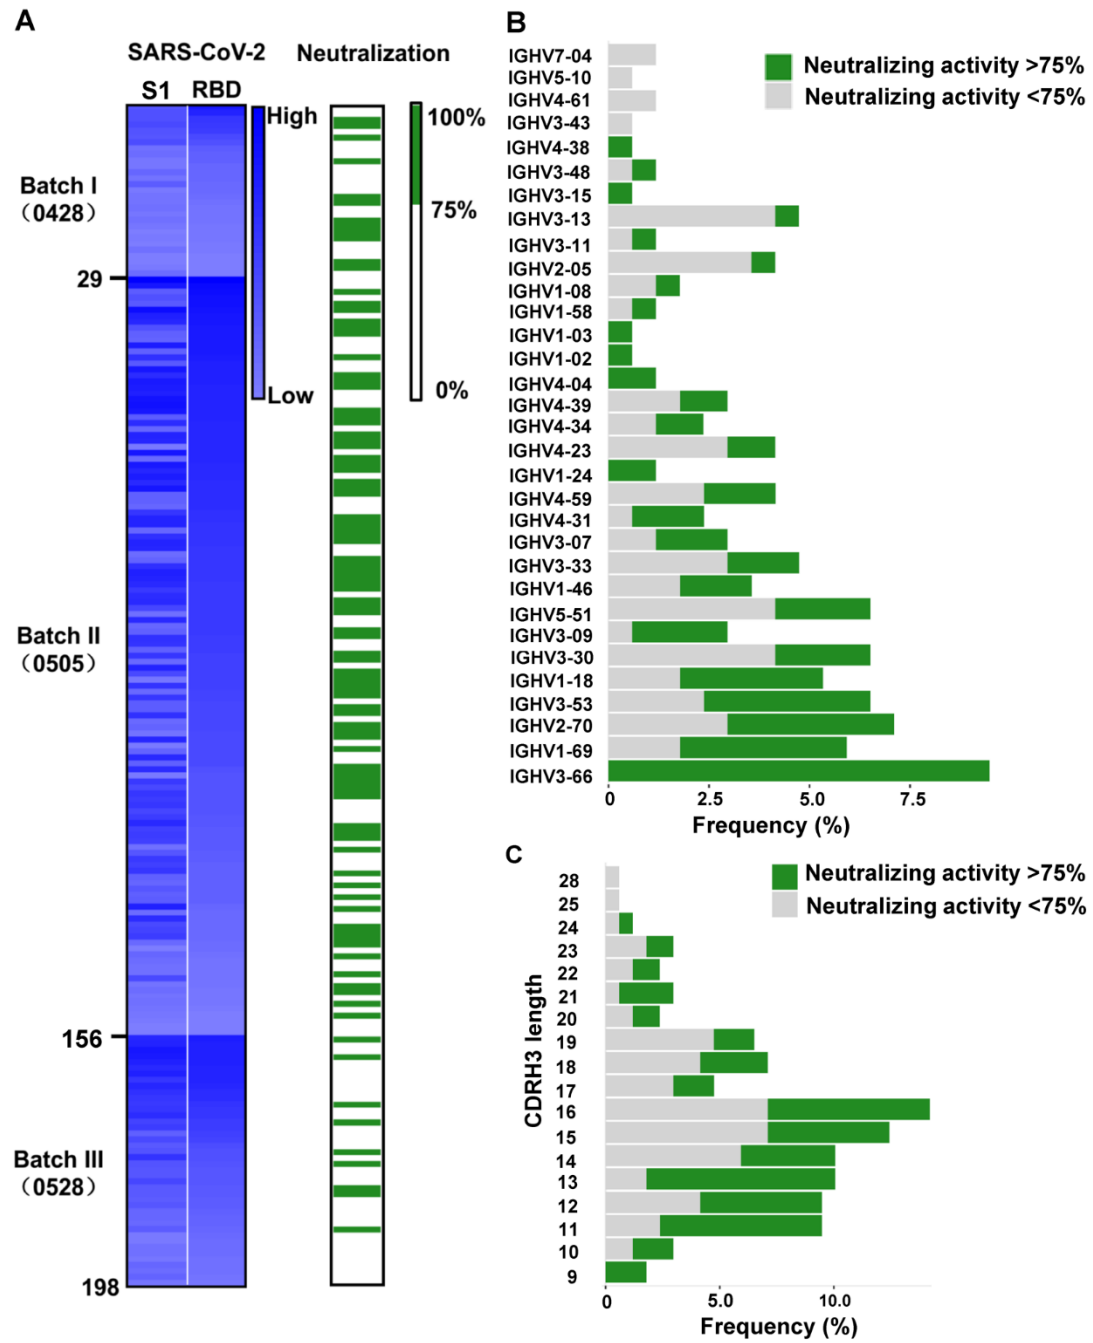

Figure 4

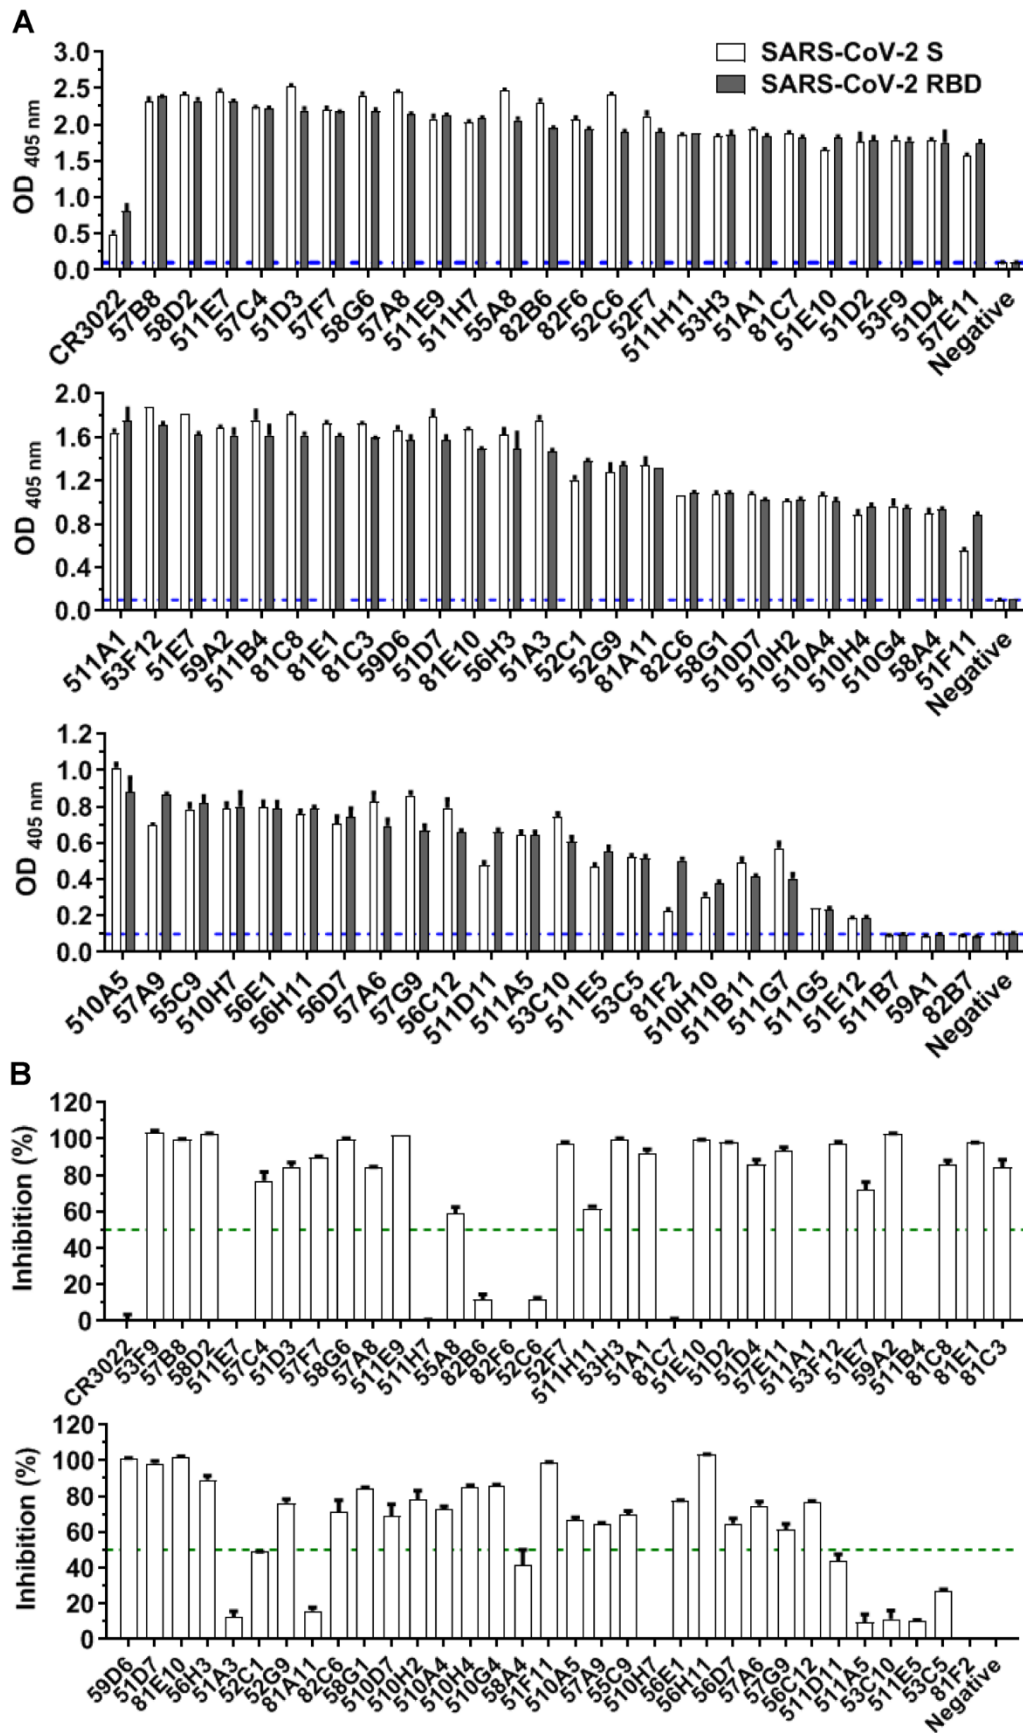

**Figure 5**

**A**

| Number | mAb   | Concentration (µg/ml) |      |      |      |      |      |      |      | Number | mAb   | Concentration (µg/ml) |      |      |      |      |      |      |      |      |      |
|--------|-------|-----------------------|------|------|------|------|------|------|------|--------|-------|-----------------------|------|------|------|------|------|------|------|------|------|
|        |       | 18.76                 | 9.38 | 4.69 | 2.35 | 1.17 | 0.59 | 0.29 | 0.14 |        |       | 18.76                 | 9.38 | 4.69 | 2.35 | 1.17 | 0.59 | 0.29 | 0.14 |      |      |
| 1      | 58G6  | -                     | -    | -    | -    | -    | -    | -    | -    | 25     | 57A9  | -                     | -    | -    | -    | +    | ++   | +++  | ++++ |      |      |
| 2      | 510A5 | -                     | -    | -    | -    | -    | -    | -    | -    | 26     | 58G1  | -                     | -    | -    | -    | +    | ++   | +++  | ++++ |      |      |
| 3      | 13G9* | -                     | -    | -    | -    | -    | -    | -    | -    | 27     | 510D7 | -                     | -    | -    | -    | +    | ++   | +++  | ++++ |      |      |
| 4      | 510A4 | -                     | -    | -    | -    | -    | -    | -    | -    | 28     | 510H4 | -                     | -    | -    | -    | +    | ++   | +++  | ++++ |      |      |
| 5      | 51D3  | -                     | -    | -    | -    | -    | -    | -    | +    | 29     | 52C6  | -                     | -    | -    | +    | +    | +++  | ++++ | ++++ |      |      |
| 6      | 55A8  | -                     | -    | -    | -    | -    | -    | -    | +    | 30     | 510H7 | -                     | -    | -    | -    | +    | ++   | +++  | ++++ | ++++ |      |
| 7      | 51A1  | -                     | -    | -    | -    | -    | -    | -    | +    | 31     | 56E1  | -                     | -    | -    | -    | +    | ++   | +++  | ++++ | ++++ |      |
| 8      | 81E1  | -                     | -    | -    | -    | -    | -    | -    | +    | 32     | 56H3  | -                     | -    | -    | -    | +    | ++   | +++  | ++++ | ++++ |      |
| 9      | 51E10 | -                     | -    | -    | -    | -    | -    | -    | +    | 33     | 51F11 | -                     | -    | -    | -    | +    | ++   | +++  | ++++ | ++++ |      |
| 10     | 51D7  | -                     | -    | -    | -    | -    | -    | -    | +    | 34     | 57C4  | -                     | -    | -    | +    | ++   | +++  | ++++ | ++++ | ++++ |      |
| 11     | 07C1  | -                     | -    | -    | -    | -    | -    | -    | +    | 35     | 07B7  | -                     | -    | -    | +    | ++   | +++  | ++++ | ++++ | ++++ |      |
| 12     | 53H3  | -                     | -    | -    | -    | -    | -    | -    | +    | 36     | 82F6  | -                     | -    | -    | +    | ++   | +++  | ++++ | ++++ | ++++ |      |
| 13     | 52F7  | -                     | -    | -    | -    | -    | -    | -    | +    | 37     | 511G7 | -                     | -    | -    | +    | ++   | +++  | ++++ | ++++ | ++++ |      |
| 14     | 57B8  | -                     | -    | -    | -    | -    | -    | -    | +    | 38     | 51E7  | -                     | -    | -    | -    | +    | ++   | +++  | ++++ | ++++ | ++++ |
| 15     | 57F7  | -                     | -    | -    | -    | -    | -    | -    | +    | 39     | 57A6  | -                     | -    | -    | -    | +    | ++   | +++  | ++++ | ++++ | ++++ |
| 16     | 51D4  | -                     | -    | -    | -    | -    | -    | -    | +    | 40     | 52G9  | -                     | -    | -    | -    | +    | ++   | +++  | ++++ | ++++ | ++++ |
| 17     | 55C9  | -                     | -    | -    | -    | -    | -    | -    | +    | 41     | 56C12 | -                     | -    | -    | -    | +    | ++   | +++  | ++++ | ++++ | ++++ |
| 18     | 56D7  | -                     | -    | -    | -    | -    | -    | -    | +    | 42     | 510G4 | -                     | -    | -    | -    | +    | ++   | +++  | ++++ | ++++ | ++++ |
| 19     | 510H2 | -                     | -    | -    | -    | -    | -    | -    | +    | 43     | 81C8  | -                     | -    | -    | -    | +    | ++   | +++  | ++++ | ++++ | ++++ |
| 20     | 81C3  | -                     | -    | -    | -    | -    | -    | -    | +    | 44     | 511A5 | -                     | -    | -    | -    | +    | ++   | +++  | ++++ | ++++ | ++++ |
| 21     | 53F12 | -                     | -    | -    | -    | -    | -    | -    | +    | 45     | 511B4 | -                     | -    | -    | -    | +    | ++   | +++  | ++++ | ++++ | ++++ |
| 22     | 82A6  | -                     | -    | -    | -    | -    | -    | -    | +    | 46     | 57A8  | -                     | -    | -    | -    | +    | ++   | +++  | ++++ | ++++ | ++++ |
| 23     | 51D2  | -                     | -    | -    | -    | -    | -    | -    | +    | 47     | 57G9  | -                     | -    | -    | -    | +    | ++   | +++  | ++++ | ++++ | ++++ |
| 24     | 57E11 | -                     | -    | -    | -    | -    | -    | -    | +    | 48     | 51E12 | -                     | -    | -    | -    | +    | ++   | +++  | ++++ | ++++ | ++++ |

**B**

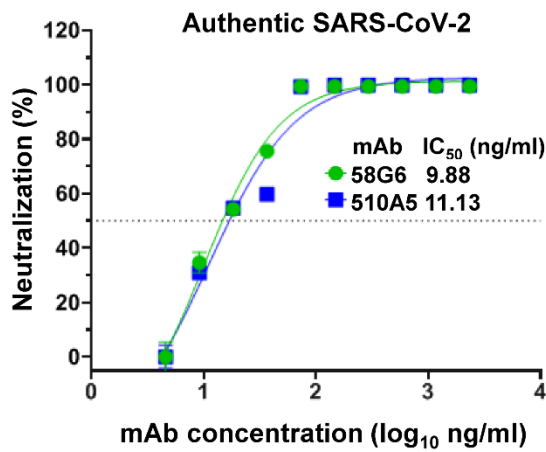

**C**

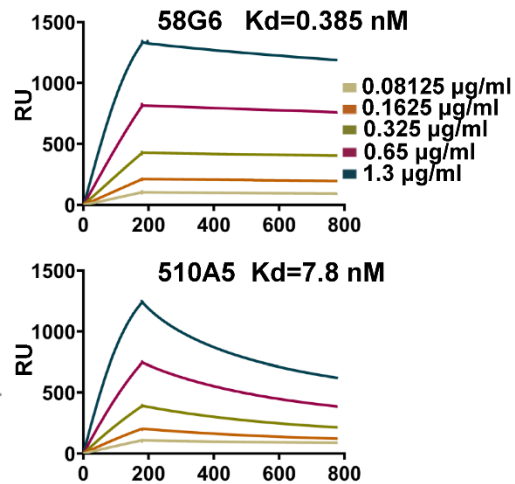

**Figure S1**

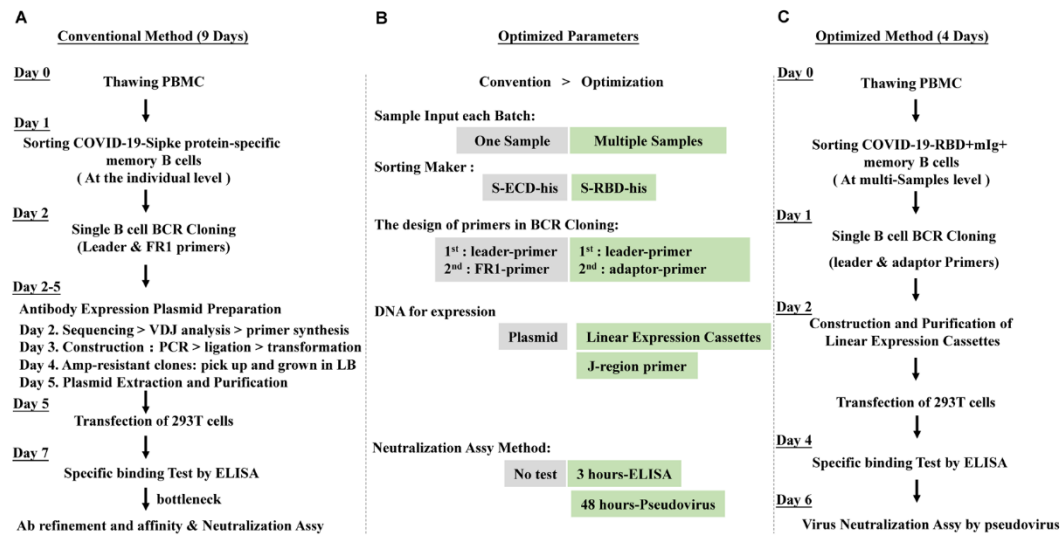

**Figure S2**

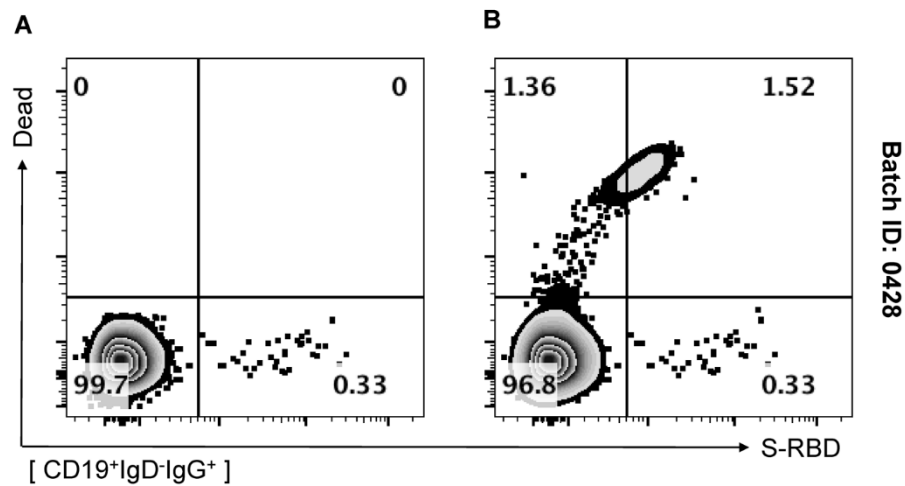

**Figure S3**

**A**

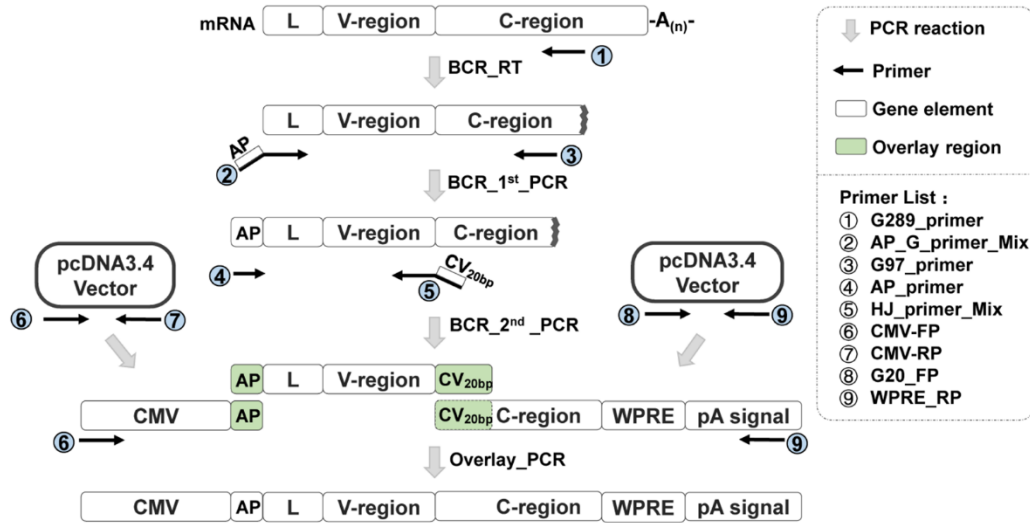

**B**

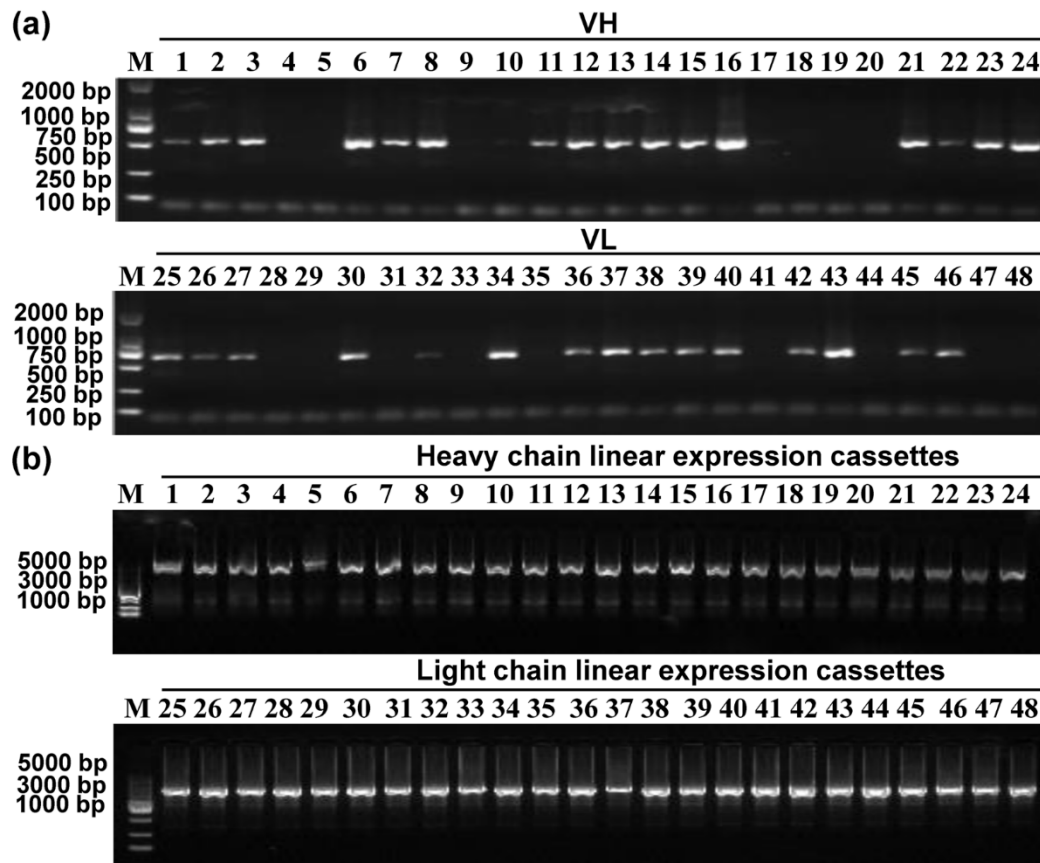

Figure S4

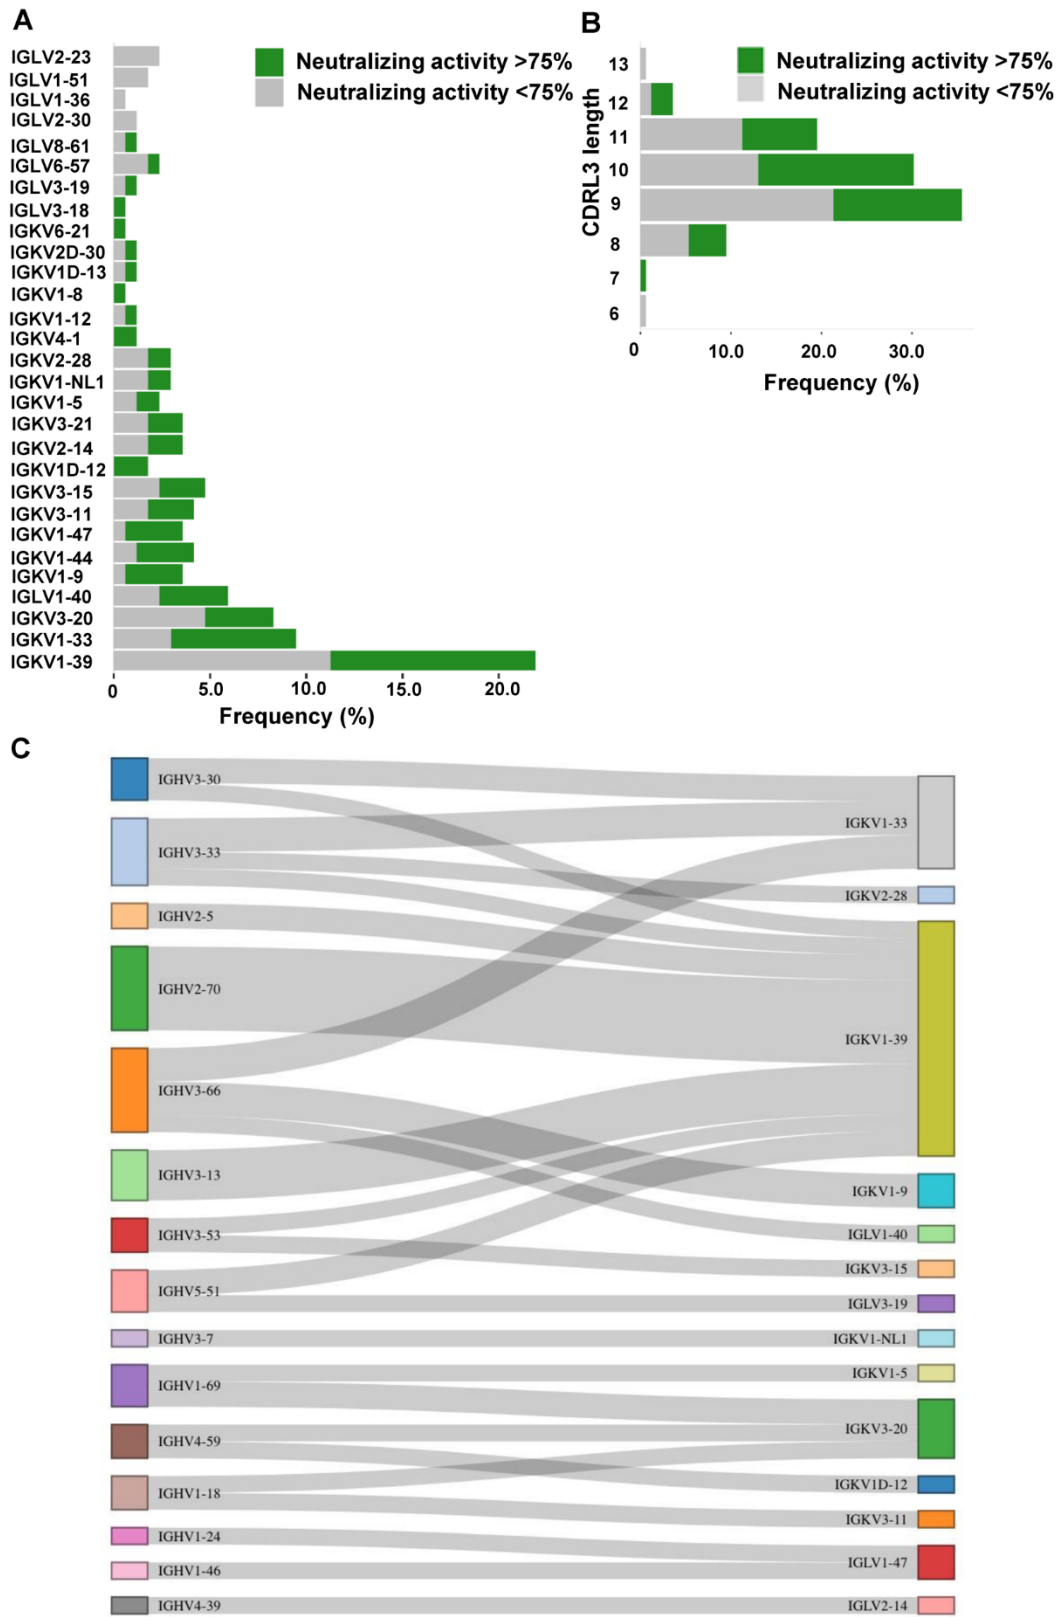

Figure S5

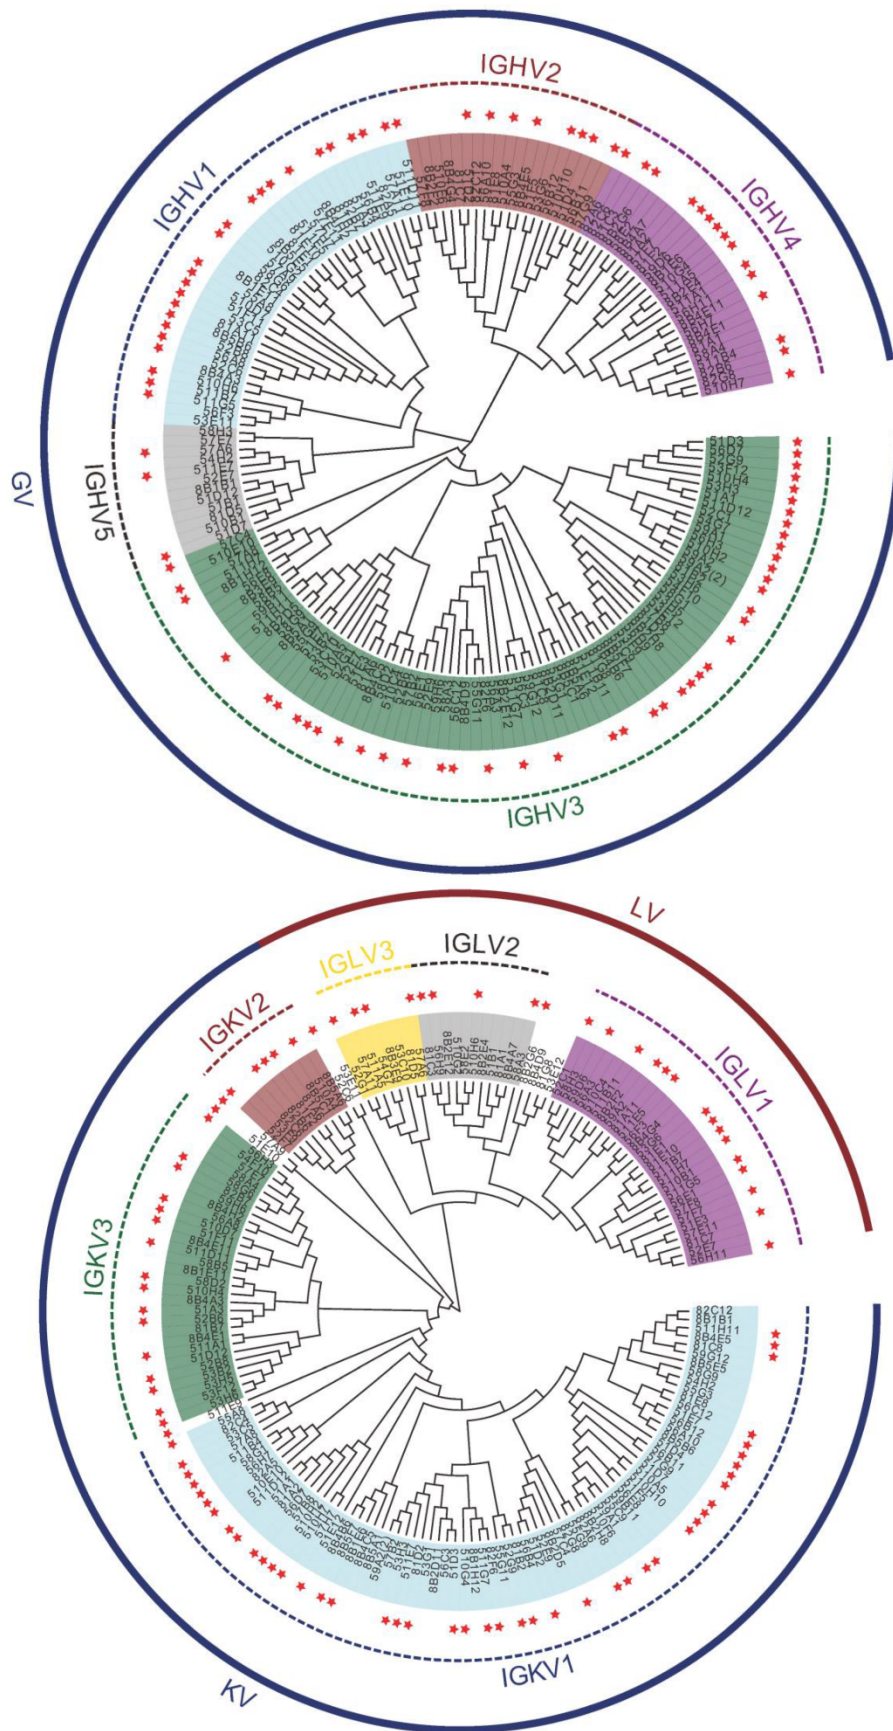

Table S1. Patient information

| Subject | Age (years) | Sex | Subsct type                      | Clinical classification (mild:0, severe:1) | City where infected | Date of admission | Date of discharge | Date of blood sample collection | Volume of collected blood sample |
|---------|-------------|-----|----------------------------------|--------------------------------------------|---------------------|-------------------|-------------------|---------------------------------|----------------------------------|
| P#1     | 46          | F   | SARS-CoV-2 convalescence patient | 0                                          | Chongqing           | 2020/2/3          | 2020/2/28         | 2020/3/16                       | 30ml                             |
| P#2     | 50          | M   | SARS-CoV-2 convalescence patient | 0                                          | Chongqing           | 2020/2/2          | 2020/2/28         | 2020/3/16                       | 30ml                             |
| P#3     | 54          | M   | SARS-CoV-2 convalescence patient | 1                                          | Chongqing           | 2020/1/29         | 2020/2/18         | 2020/3/16                       | 30ml                             |
| P#4     | 47          | M   | SARS-CoV-2 convalescence patient | 1                                          | Chongqing           | 2020/1/27         | 2020/2/23         | 2020/3/16                       | 30ml                             |
| P#5     | 48          | F   | SARS-CoV-2 convalescence patient | 0                                          | Chongqing           | 2020/2/16         | 2020/2/28         | 2020/3/16                       | 30ml                             |
| P#6     | 31          | M   | SARS-CoV-2 convalescence patient | 0                                          | Chongqing           | 2020/1/30         | 2020/2/10         | 2020/3/16                       | 30ml                             |
| P#7     | 45          | F   | SARS-CoV-2 convalescence patient | 0                                          | Chongqing           | 2020/2/1          | 2020/2/15         | 2020/3/16                       | 30ml                             |
| P#8     | 51          | F   | SARS-CoV-2 convalescence patient | 0                                          | Chongqing           | 2020/1/31         | 2020/2/17         | 2020/3/16                       | 50ml                             |
| P#9     | 48          | M   | SARS-CoV-2 convalescence patient | 1                                          | Chongqing           | 2020/1/30         | 2020/2/18         | 2020/4/1                        | 50ml                             |
| P#10    | 31          | M   | SARS-CoV-2 convalescence patient | 0                                          | Chongqing           | 2020/1/29         | 2020/2/18         | 2020/4/1                        | 50ml                             |
| P#11    | 54          | M   | SARS-CoV-2 convalescence patient | 0                                          | Chongqing           | 2020/2/2          | 2020/2/18         | 2020/4/1                        | 30ml                             |
| P#12    | 47          | F   | SARS-CoV-2 convalescence patient | 0                                          | Chongqing           | 2020/1/31         | 2020/2/10         | 2020/4/1                        | 10ml                             |
| P#13    | 38          | M   | SARS-CoV-2 convalescence patient | 0                                          | Chongqing           | 2020/2/10         | 2020/2/19         | 2020/4/1                        | 10ml                             |
| P#14    | 33          | F   | SARS-CoV-2 convalescence patient | 0                                          | Chongqing           | 2020/2/10         | 2020/3/9          | 2020/4/1                        | 10ml                             |
| P#15    | 44          | M   | SARS-CoV-2 convalescence patient | 0                                          | Chongqing           | 2020/2/5          | 2020/2/14         | 2020/4/1                        | 50ml                             |
| P#16    | 60          | F   | SARS-CoV-2 convalescence patient | 0                                          | Chongqing           | 2020/2/11         | 2020/3/5          | 2020/4/1                        | 30ml                             |
| P#17    | 48          | M   | SARS-CoV-2 convalescence patient | 0                                          | Chongqing           | 2020/2/12         | 2020/3/6          | 2020/4/1                        | 30ml                             |
| P#18    | 53          | F   | SARS-CoV-2 convalescence patient | 0                                          | Chongqing           | 2020/2/16         | 2020/2/28         | 2020/4/1                        | 10ml                             |
| P#19    | 57          | M   | SARS-CoV-2 convalescence patient | 0                                          | Chongqing           | 2020/1/29         | 2020/2/14         | 2020/4/1                        | 10ml                             |
| P#20    | 44          | M   | SARS-CoV-2 convalescence patient | 0                                          | Chongqing           | 2020/2/6          | 2020/2/29         | 2020/4/1                        | 10ml                             |
| P#21    | 44          | F   | SARS-CoV-2 convalescence patient | 0                                          | Chongqing           | 2020/2/13         | 2020/3/11         | 2020/4/1                        | 30ml                             |
| P#22    | 20          | F   | SARS-CoV-2 convalescence patient | 0                                          | Chongqing           | 2020/2/15         | 2020/2/25         | 2020/4/1                        | 30ml                             |
| P#23    | 37          | M   | SARS-CoV-2 convalescence patient | 0                                          | Chongqing           | 2020/2/2          | 2020/3/9          | 2020/4/1                        | 50ml                             |
| P#24    | 44          | F   | SARS-CoV-2 convalescence patient | 0                                          | Chongqing           | 2020/2/3          | 2020/2/28         | 2020/4/1                        | 50ml                             |
| P#25    | 41          | M   | SARS-CoV-2 convalescence patient | 0                                          | Chongqing           | 2020/1/31         | 2020/2/16         | 2020/4/1                        | 14ml                             |
| P#26    | 66          | M   | SARS-CoV-2 convalescence patient | 0                                          | Chongqing           | 2020/2/3          | 2020/2/16         | 2020/4/1                        | 10ml                             |
| P#27    | 67          | F   | SARS-CoV-2 convalescence patient | 0                                          | Chongqing           | 2020/2/4          | 2020/2/16         | 2020/4/1                        | 10ml                             |
| P#28    | 50          | M   | SARS-CoV-2 convalescence patient | 1                                          | Chongqing           | 2020/2/1          | 2020/2/29         | 2020/4/1                        | 30ml                             |
| P#29    | 50          | F   | SARS-CoV-2 convalescence patient | 0                                          | Chongqing           | 2020/1/28         | 2020/2/29         | 2020/4/1                        | 50ml                             |
| P#30    | 49          | F   | SARS-CoV-2 convalescence patient | 0                                          | Chongqing           | 2020/2/8          | 2020/3/6          | 2020/4/1                        | 30ml                             |
| P#31    | 56          | M   | SARS-CoV-2 convalescence patient | 0                                          | Chongqing           | 2020/2/1          | 2020/2/9          | 2020/4/1                        | 30ml                             |
| P#32    | 55          | M   | SARS-CoV-2 convalescence patient | 0                                          | Chongqing           | 2020/2/14         | 2020/2/21         | 2020/4/1                        | 50ml                             |
| P#33    | 45          | F   | SARS-CoV-2 convalescence patient | 0                                          | Chongqing           | 2020/2/1          | 2020/2/15         | 2020/4/1                        | 30ml                             |
| P#34    | 47          | F   | SARS-CoV-2 convalescence patient | 0                                          | Chongqing           | 2020/2/6          | 2020/2/17         | 2020/4/1                        | 10ml                             |
| P#35    | 34          | M   | SARS-CoV-2 convalescence patient | 0                                          | Chongqing           | 2020/1/28         | 2020/2/7          | 2020/4/1                        | 10ml                             |
| P#36    | 47          | M   | SARS-CoV-2 convalescence patient | 1                                          | Chongqing           | 2020/1/27         | 2020/2/23         | 2020/4/1                        | 50ml                             |
| P#37    | 56          | M   | SARS-CoV-2 convalescence patient | 0                                          | Chongqing           | 2020/1/30         | 2020/2/7          | 2020/4/1                        | 40ml                             |
| P#38    | 63          | F   | SARS-CoV-2 convalescence patient | 0                                          | Chongqing           | 2020/2/1          | 2020/2/25         | 2020/4/1                        | 10ml                             |
| P#39    | 37          | M   | SARS-CoV-2 convalescence patient | 0                                          | Chongqing           | 2020/1/27         | 2020/2/14         | 2020/4/1                        | 10ml                             |



Table S2. Three batches of S-RBD specific B memory cell sorting

| Batch | Sample count | Subject | Volume of blood used for sorting(ml) | Total volume of blood(ml) | Number of sorted 96 wells plates | Number of Paired mAbs after BCR RT-PCR | Number of Specific mAbs (note-01) | Number of Neutralizing mAbs (note-01) |
|-------|--------------|---------|--------------------------------------|---------------------------|----------------------------------|----------------------------------------|-----------------------------------|---------------------------------------|
| 0428  | 1            | p#10    | 10                                   | 70                        | 2                                | 72                                     | 29                                | 12                                    |
|       | 2            | p#11    | 10                                   |                           |                                  |                                        |                                   |                                       |
|       | 3            | p#29    | 10                                   |                           |                                  |                                        |                                   |                                       |
|       | 4            | p#30    | 10                                   |                           |                                  |                                        |                                   |                                       |
|       | 5            | p#32    | 10                                   |                           |                                  |                                        |                                   |                                       |
|       | 6            | p#36    | 10                                   |                           |                                  |                                        |                                   |                                       |
|       | 7            | p#37    | 10                                   |                           |                                  |                                        |                                   |                                       |
| 0505  | 1            | p#8     | 10                                   | 60                        | 11                               | 324                                    | 127                               | 75                                    |
|       | 2            | p#16    | 15                                   |                           |                                  |                                        |                                   |                                       |
|       | 3            | p#17    | 15                                   |                           |                                  |                                        |                                   |                                       |
|       | 4            | p#26    | 10                                   |                           |                                  |                                        |                                   |                                       |
|       | 5            | p#27    | 10                                   |                           |                                  |                                        |                                   |                                       |
| 0528  | 1            | p#01    | 10                                   | 75                        | 4.5                              | 101                                    | 42                                | 9                                     |
|       | 2            | p#03    | 10                                   |                           |                                  |                                        |                                   |                                       |
|       | 3            | p#04    | 10                                   |                           |                                  |                                        |                                   |                                       |
|       | 4            | p#06    | 10                                   |                           |                                  |                                        |                                   |                                       |
|       | 5            | p#09    | 10                                   |                           |                                  |                                        |                                   |                                       |
|       | 6            | p#22    | 10                                   |                           |                                  |                                        |                                   |                                       |
|       | 7            | p#25    | 5                                    |                           |                                  |                                        |                                   |                                       |
|       | 8            | p#28    | 5                                    |                           |                                  |                                        |                                   |                                       |
|       | 9            | p#31    | 5                                    |                           |                                  |                                        |                                   |                                       |
| Sum:  |              |         |                                      |                           |                                  | 497                                    | 198                               | 96                                    |

Note-01: the linear expression cassettes were transfected into 293T cells for expressing Ab proteins. The supernatants of cell cultures were collected 48hs later. the specific binding ability were assessed by ELISA. the neutralizaion capability were assessed by pseudovirus assay.

Table S3. BCR RT-PCR Reaction mixture and PCR Program setup

### Section 01. Single Cell BCR RT-PCR Procedure

#### 1. Preparation of PCR Reaction Mixture

##### (1) Preparation of RT

###### a. Preparation of RT\_Mix\_A (5µl/tube)

| Seq. | Component         | Amount (µl) |
|------|-------------------|-------------|
| 1    | Water             | 2.6         |
| 2    | 2.5 mM dNTPs      | 2           |
| 3    | BCR_RT_Primer_Mix | 0.4         |

###### b. Preparation of RT\_Mix\_B (5µl/tube)

| Seq. | Component                                     | Amount (µl) |
|------|-----------------------------------------------|-------------|
| 4    | Water                                         | 2.25        |
| 5    | 5×PrimeScript II Buffer                       | 2           |
| 6    | 200 U/µl PrimeScript II Reverse Transcriptase | 0.5         |
| 7    | 40,000 U/ml RNase Inhibitor, Murine (NEB)     | 0.25        |

##### (2) Preparation of 1st and 2nd PCR (10µl/tube)

1st\_PCR\_Mix\_N and 2nd\_PCR\_Mix\_N use the same reaction condition except the primers.

| Seq. | Component                            | Amount (µl) |
|------|--------------------------------------|-------------|
| 1    | 2×PrimeSTAR GC Buffer (Takara)       | 5           |
| 2    | nuclease-free water                  | 2.75        |
| 3    | 2.5 mM dNTP                          | 0.8         |
| 4    | 10 µM Forward Primer                 | 0.2         |
| 5    | 10 µM Reverse Primer                 | 0.2         |
| 6    | 2.5 U/µl PrimeSTAR HS DNA polymerase | 0.05        |
| 7    | Template                             | 0           |

##### (3) Usage of primers

###### a. For 1st\_PCR\_Mix

|                | For 1st_PCR_Mix_Gamma | For 1st_PCR_Mix_Kappa | For 1st_PCR_Mix_Lambda |
|----------------|-----------------------|-----------------------|------------------------|
| Forward Primer | AP_G_leader Mix       | AP_K_leader Mix       | AP_L_leader Mix        |
| Reverse Primer | G289_primer(10µM)     | K244_Primer(10µM)     | L81_Primer(10µM)       |

###### b. For 2nd\_PCR\_Mix

|                | For 2nd_PCR_Mix_Gamma  | For 2nd_PCR_Mix_Kappa | For 2nd_PCR_Mix_Lambda |
|----------------|------------------------|-----------------------|------------------------|
| Forward Primer | 10 µM AP_Primer        | 10 µM AP_Primer       | 10 µM AP_Primer        |
| Reverse Primer | IGHJ_region_Primer Mix | 10 µM K194_Primer Mix | 10 µM L19_Primer Mix   |

##### 2. Operation Procedure

- (1) Take out the sorted 96-well plate at -80. Add 5µl RT\_Mix\_A to each well, and rinse the well to promote cell RNA dissolution.
- (2) Incubate the plate at 65° for 5min and put it on ice immediately.
- (3) Add 5µl of RT\_Mix\_B to each well of the plate, mix and centrifuge, and then perform RT reaction.
- (4) 9µl aliquots of 1st\_PCR\_Mix in a new 96 wells plate, add 1µl RT product to each well, and then perform 1st PCR Reaction.
- (5) After PCR is completed, the 1st product is ten-fold diluted, and 1µl is used as a template for the next round of PCR.
- (6) 9µl aliquot 2nd\_PCR\_Mix in a new 96 wells plate, add 1µl 1st diluted product to each well, and then perform 2nd PCR Reaction.
- (7) Prepare 2% agar gel, load 3µl sample to analysis PCR result.

### Section 02. PCR Program Setup

#### 1. For RT Reaction

|     |          |
|-----|----------|
| 45° | 45min    |
| 70° | 15min    |
| 4°  | infinity |

#### 2. For 1st PCR Reaction

|     |          |          |
|-----|----------|----------|
| 95  | 3min     | 30cycles |
| 95  | 10s      |          |
| 55  | 5s       |          |
| 72° | 1min     |          |
| 72° | 5min     |          |
| 4°  | infinity |          |

#### 3. For 2nd PCR Reaction

|     |          |          |
|-----|----------|----------|
| 95  | 3min     | 35cycles |
| 95  | 10s      |          |
| 55  | 5s       |          |
| 72° | 45s      |          |
| 72° | 5min     |          |
| 4°  | infinity |          |

Table S4. Primers List of BCR RT-PCR

| Primer_Name    | V/D/J gene segments | Primer_Sequence(5'>3')                   | Usage description                                        |
|----------------|---------------------|------------------------------------------|----------------------------------------------------------|
| GV_01          | IGHV1-18*01         | CGGTACCGCGGGCCCGGAatggactggacctggagcat   | AP_G_Leader_Mix                                          |
| GV_02          | IGHV1-2*01          | CGGTACCGCGGGCCCGGAatggactggacctggagcat   | As forward primer of heavy chain 1st PCR                 |
| GV_03          | IGHV1-24*01         | CGGTACCGCGGGCCCGGAatggactggacctggagcat   |                                                          |
| GV_04          | IGHV1-38-4*01       | CGGTACCGCGGGCCCGGAatggactggacctggagcat   |                                                          |
| GV_05          | IGHV1-45*01         | CGGTACCGCGGGCCCGGAatggactggacctggagcat   |                                                          |
| GV_06          | IGHV1-46*01         | CGGTACCGCGGGCCCGGAatggactggacctggagcat   |                                                          |
| GV_07          | IGHV1-58*01         | CGGTACCGCGGGCCCGGAatggactggacctggagcat   |                                                          |
| GV_08          | IGHV1-69*01         | CGGTACCGCGGGCCCGGAatggactggacctggagcat   |                                                          |
| GV_09          | IGHV2-26*01         | CGGTACCGCGGGCCCGGAatggacacactttgctccac   |                                                          |
| GV_10          | IGHV2-5*01          | CGGTACCGCGGGCCCGGAatggacacactttgctccac   |                                                          |
| GV_11          | IGHV2-70*01         | CGGTACCGCGGGCCCGGAatggacacactttgctccac   |                                                          |
| GV_12          | IGHV2-OR16-5*01     | CGGTACCGCGGGCCCGGAatggacacactttgctccac   |                                                          |
| GV_13          | IGHV3-11*01         | CGGTACCGCGGGCCCGGAatggagtgtggcctgagctg   |                                                          |
| GV_14          | IGHV3-13*01         | CGGTACCGCGGGCCCGGAatggagtgtggcctgagctg   |                                                          |
| GV_15          | IGHV3-16*01         | CGGTACCGCGGGCCCGGAatggagtgtggcctgagctg   |                                                          |
| GV_16          | IGHV3-21*01         | CGGTACCGCGGGCCCGGAatggagtgtggcctgagctg   |                                                          |
| GV_17          | IGHV3-43*01         | CGGTACCGCGGGCCCGGAatggagtgtggcctgagctg   |                                                          |
| GV_18          | IGHV3-48*01         | CGGTACCGCGGGCCCGGAatggagtgtggcctgagctg   |                                                          |
| GV_19          | IGHV3-49*01         | CGGTACCGCGGGCCCGGAatggagtgtggcctgagctg   |                                                          |
| GV_20          | IGHV3-53*01         | CGGTACCGCGGGCCCGGAatggagtgtggcctgagctg   |                                                          |
| GV_21          | IGHV3-64*01         | CGGTACCGCGGGCCCGGAatggagtgtggcctgagctg   |                                                          |
| GV_22          | IGHV3-64D*06        | CGGTACCGCGGGCCCGGAatggagtgtggcctgagctg   |                                                          |
| GV_23          | IGHV3-7*01          | CGGTACCGCGGGCCCGGAatggagtgtggcctgagctg   |                                                          |
| GV_24          | IGHV3-9*01          | CGGTACCGCGGGCCCGGAatggagtgtggcctgagctg   |                                                          |
| GV_25          | IGHV4-28*01         | CGGTACCGCGGGCCCGGAatgaaacacactgtggttctt  |                                                          |
| GV_26          | IGHV4-38-2*02       | CGGTACCGCGGGCCCGGAatgaaacacactgtggttctt  |                                                          |
| GV_27          | IGHV4-39*01         | CGGTACCGCGGGCCCGGAatgaaacacactgtggttctt  |                                                          |
| GV_28          | IGHV4-59*01         | CGGTACCGCGGGCCCGGAatgaaacacactgtggttctt  |                                                          |
| GV_29          | IGHV5-10-1*02       | CGGTACCGCGGGCCCGGAatgcaagtggggcctctcc    |                                                          |
| GV_30          | IGHV5-51*01         | CGGTACCGCGGGCCCGGAatgcaagtggggcctctcc    |                                                          |
| GV_31          | IGHV6-1*01          | CGGTACCGCGGGCCCGGAatgctgtctctctctctct    |                                                          |
| KV_01          | IGKV1-OR2-0*01      | CGGTACCGCGGGCCCGGAatgagggcccccaactcaagct | AP_K_Leader_Mix                                          |
| KV_02          | IGKV1-OR2-108*01    | CGGTACCGCGGGCCCGGAatgagggcccccaactcaagct | As forward primer of kappa light chain 1st PCR           |
| KV_03          | IGKV1-16*01         | CGGTACCGCGGGCCCGGAatgagggcccccaactcaagct |                                                          |
| KV_04          | IGKV1-27*01         | CGGTACCGCGGGCCCGGAatgagggcccccaactcaagct |                                                          |
| KV_05          | IGKV1-5*01          | CGGTACCGCGGGCCCGGAatgagggcccccaactcaagct |                                                          |
| KV_06          | IGKV1-8*01          | CGGTACCGCGGGCCCGGAatgagggcccccaactcaagct |                                                          |
| KV_07          | IGKV1D-16*01        | CGGTACCGCGGGCCCGGAatgagggcccccaactcaagct |                                                          |
| KV_08          | IGKV1D-43*01        | CGGTACCGCGGGCCCGGAatgagggcccccaactcaagct |                                                          |
| KV_09          | IGKV2-24*01         | CGGTACCGCGGGCCCGGAatgagggcccccaactcaagct |                                                          |
| KV_10          | IGKV2-28*01         | CGGTACCGCGGGCCCGGAatgagggcccccaactcaagct |                                                          |
| KV_11          | IGKV3-OR2-268*01    | CGGTACCGCGGGCCCGGAatgagggcccccaactcaagct |                                                          |
| KV_12          | IGKV3-15*01         | CGGTACCGCGGGCCCGGAatgagggcccccaactcaagct |                                                          |
| KV_13          | IGKV3-20*01         | CGGTACCGCGGGCCCGGAatgagggcccccaactcaagct |                                                          |
| KV_14          | IGKV3-7*01          | CGGTACCGCGGGCCCGGAatgagggcccccaactcaagct |                                                          |
| KV_15          | IGKV3D-7*01         | CGGTACCGCGGGCCCGGAatgagggcccccaactcaagct |                                                          |
| KV_16          | IGKV4-1*01          | CGGTACCGCGGGCCCGGAatgagggcccccaactcaagct |                                                          |
| KV_17          | IGKV5-2*01          | CGGTACCGCGGGCCCGGAatgagggcccccaactcaagct |                                                          |
| KV_18          | IGKV6-21*01         | CGGTACCGCGGGCCCGGAatgagggcccccaactcaagct |                                                          |
| KV_19          | IGKV6D-41*01        | CGGTACCGCGGGCCCGGAatgagggcccccaactcaagct |                                                          |
| LV_01          | IGLV1-40*01         | CGGTACCGCGGGCCCGGAatggcctgggtctctctctct  | AP_L_Leader_Mix                                          |
| LV_02          | IGLV1-41*01         | CGGTACCGCGGGCCCGGAatggcctgggtctctctctct  | As forward primer of lambda light chain 1st PCR          |
| LV_03          | IGLV1-47*02         | CGGTACCGCGGGCCCGGAatggcctgggtctctctctct  |                                                          |
| LV_04          | IGLV10-54*02        | CGGTACCGCGGGCCCGGAatggcctgggtctctctctct  |                                                          |
| LV_05          | IGLV11-55*01        | CGGTACCGCGGGCCCGGAatggcctgggtctctctctct  |                                                          |
| LV_06          | IGLV2-8*02          | CGGTACCGCGGGCCCGGAatggcctgggtctctctctct  |                                                          |
| LV_07          | IGLV3-1*01          | CGGTACCGCGGGCCCGGAatggcctgggtctctctctct  |                                                          |
| LV_08          | IGLV3-10*02         | CGGTACCGCGGGCCCGGAatggcctgggtctctctctct  |                                                          |
| LV_09          | IGLV3-19*01         | CGGTACCGCGGGCCCGGAatggcctgggtctctctctct  |                                                          |
| LV_10          | IGLV3-21*01         | CGGTACCGCGGGCCCGGAatggcctgggtctctctctct  |                                                          |
| LV_11          | IGLV3-25*02         | CGGTACCGCGGGCCCGGAatggcctgggtctctctctct  |                                                          |
| LV_12          | IGLV3-27*01         | CGGTACCGCGGGCCCGGAatggcctgggtctctctctct  |                                                          |
| LV_13          | IGLV3-9*02          | CGGTACCGCGGGCCCGGAatggcctgggtctctctctct  |                                                          |
| LV_14          | IGLV4-3*01          | CGGTACCGCGGGCCCGGAatggcctgggtctctctctct  |                                                          |
| LV_15          | IGLV4-60*02         | CGGTACCGCGGGCCCGGAatggcctgggtctctctctct  |                                                          |
| LV_16          | IGLV5-39*02         | CGGTACCGCGGGCCCGGAatggcctgggtctctctctct  |                                                          |
| LV_17          | IGLV6-57*02         | CGGTACCGCGGGCCCGGAatggcctgggtctctctctct  |                                                          |
| LV_18          | IGLV7-43*01         | CGGTACCGCGGGCCCGGAatggcctgggtctctctctct  |                                                          |
| LV_19          | IGLV8-61*02         | CGGTACCGCGGGCCCGGAatggcctgggtctctctctct  |                                                          |
| LV_20          | IGLV8/OR8-1*02      | CGGTACCGCGGGCCCGGAatggcctgggtctctctctct  |                                                          |
| LV_21          | IGLV9-49*02         | CGGTACCGCGGGCCCGGAatggcctgggtctctctctct  |                                                          |
| IGHJ_01        | IGHJ1*01            | GATGGGCCCTTGGTGGAGGTTGAGGAGACGGTGACACAGG | IGHJ_region_Primer_Mix                                   |
| IGHJ_02        | IGHJ2*01            | GATGGGCCCTTGGTGGAGGTTGAGGAGACGGTGACACAGG |                                                          |
| IGHJ_03        | IGHJ3*01            | GATGGGCCCTTGGTGGAGGTTGAGGAGACGGTGACACATG |                                                          |
| IGHJ_04        | IGHJ6*01            | GATGGGCCCTTGGTGGAGGTTGAGGAGACGGTGACACATG |                                                          |
| IGKJ_01        | IGKJ1*01            | GATGGTGCAGCCACAGTTCGTTTGAATTCACACTTGGTCC | IGKJ_region_Primer_Mix                                   |
| IGKJ_02        | IGKJ2*01            | GATGGTGCAGCCACAGTTCGTTTGAATTCACACTTGGTCC |                                                          |
| IGKJ_03        | IGKJ3*01            | GATGGTGCAGCCACAGTTCGTTTGAATTCACACTTGGTCC |                                                          |
| IGKJ_04        | IGKJ4*01            | GATGGTGCAGCCACAGTTCGTTTGAATTCACACTTGGTCC |                                                          |
| IGKJ_05        | IGKJ5*01            | GATGGTGCAGCCACAGTTCGTTTGAATTCACACTTGGTCC |                                                          |
| IGLJ_01        | IGLJ1*01            | GGGGCAGCCTTGGGCTGACCTAGGACGGTACCTTGGTCC  | IGLJ_region_Primer_Mix                                   |
| IGLJ_02        | IGLJ2*01            | GGGGCAGCCTTGGGCTGACCTAGGACGGTACCTTGGTCC  |                                                          |
| IGLJ_03        | IGLJ4*01            | GGGGCAGCCTTGGGCTGACCTAGGACGGTACCTTGGTCC  |                                                          |
| IGLJ_04        | IGLJ5*01            | GGGGCAGCCTTGGGCTGACCTAGGACGGTACCTTGGTCC  |                                                          |
| IGLJ_05        | IGLJ5*02            | GGGGCAGCCTTGGGCTGACCTAGGACGGTACCTTGGTCC  |                                                          |
| IGLJ_06        | IGLJ6*01            | GGGGCAGCCTTGGGCTGACCTAGGACGGTACCTTGGTCC  |                                                          |
| IGLJ_07        | IGLJ7*01            | GGGGCAGCCTTGGGCTGACCTAGGACGGTACCTTGGTCC  |                                                          |
| IGLJ_08        | IGLJ7*02            | GGGGCAGCCTTGGGCTGACCTAGGACGGTACCTTGGTCC  |                                                          |
| G289-primer    | N.D.                | TCTTGTCCACTTGGTGTGCT                     | As reverse primer of heavy chain RT & 1st PCR            |
| G97-primer     | N.D.                | AGTAGTCTTTGACACGGCAGCCAG                 | As reverse primer of heavy chain 2nd PCR                 |
| K244-primer    | N.D.                | GTTCCTCGTAGTCTGCTTTGCTCA                 | As reverse primer of kappa light chain RT & 1st PCR      |
| K194-primer-01 | N.D.                | BTGCTGCTTGGTCTCTCTGCT                    | As reverse primer of kappa light chain 2nd PCR           |
| K194-primer-02 | N.D.                | BTGCTGCTTGGTCTCTCTGCT                    |                                                          |
| L81-primer     | N.D.                | CACCACTGTGGCCTTGTGGCTTG                  | As reverse primer of lambda light chain RT & 1st PCR     |
| L19-primer-01  | N.D.                | GGGCGGGAACAGAGTGACC                      | As reverse primer of lambda light chain 2nd PCR          |
| L19-primer-02  | N.D.                | GGGCGGGAACAGAGTGACC                      |                                                          |
| L19-primer-03  | N.D.                | GGGCGGGAACAGAGTGACC                      |                                                          |
| AP3            | N.D.                | CGGTACCGCGGGCCCGGA                       | As forward primer of 2nd PCR                             |
| G20FP          | N.D.                | CCCTCCACCAAGGCCCATC                      | Construction of the linear antibody expression cassettes |
| K20FP          | N.D.                | CGAAGTGTGGCTGCACCATC                     |                                                          |
| L20FP          | N.D.                | GGTCAGCCCAAGGCTGCCCC                     |                                                          |
| CMV-FP-01      | N.D.                | AGATATACCGGTTGACATTG                     |                                                          |
| CMV-RP         | N.D.                | TCCCGGGCCCGCGGTACCG                      |                                                          |
| WPRE-RP        | N.D.                | AGCCCCAGCTGCCGAGATCT                     |                                                          |

Table S5. Preparation of BCR Cloning primers

|                                                                                                                                                                                                                                                                                                                                                                                                                                                       |
|-------------------------------------------------------------------------------------------------------------------------------------------------------------------------------------------------------------------------------------------------------------------------------------------------------------------------------------------------------------------------------------------------------------------------------------------------------|
| <b>Step 01. Dissolve primer powder in water</b>                                                                                                                                                                                                                                                                                                                                                                                                       |
| the leader primers and J-region primers are dissolved to 100uM<br>the other primers are dissolved to 10µM                                                                                                                                                                                                                                                                                                                                             |
| <b>Step 02. Preparation of BCR_RT_Primer_Mix (each 2µM)</b>                                                                                                                                                                                                                                                                                                                                                                                           |
| take 100µl G289_primer(10µM), K244_primer(10µM), L81 primer(10µM), respectively, then mix according to 1:1:1.                                                                                                                                                                                                                                                                                                                                         |
| <b>Step 03. Preparation of AP_Leader_Mix (each 2µM)</b>                                                                                                                                                                                                                                                                                                                                                                                               |
| (1) For AP_G_Leader_Mix: Add 380µl water to a 1.5ml centrifuge tube, and take 20µl each of the 31 GV_N primers, and the final volume is 1000µl;<br>(2) For AP_K_Leader_Mix: Add 620µl water to a 1.5ml centrifuge tube, and take 20µl each of the 19 KV_N primers, and the final volume is 1000µl;<br>(3) For AP_L_Leader_Mix: Add 580µl water to a 1.5ml centrifuge tube, and take 20µl each of the 21 LV_N primers, and the final volume is 1000µl; |
| <b>Step 04. Preparation of IGHJ_region_Primer_Mix (each 2µM)</b>                                                                                                                                                                                                                                                                                                                                                                                      |
| Add 920µl water to a 1.5ml centrifuge tube, and take 20µl each of the 4 IGHJ_N primers, and the                                                                                                                                                                                                                                                                                                                                                       |
| <b>Step 05. Preparation of K194_Primer_Mix</b>                                                                                                                                                                                                                                                                                                                                                                                                        |
| take 100µl each of the following 2 primers, then mix:<br>K194-primer-01 (10µM)<br>K194-primer-02 (10µM)                                                                                                                                                                                                                                                                                                                                               |
| <b>Step 06. Preparation of L19_Primer_Mix</b>                                                                                                                                                                                                                                                                                                                                                                                                         |
| take 100µl each of the following 3 primers, then mix:<br>L19-primer-01 (10µM)<br>L19-primer-02 (10µM)<br>L19-primer-03 (10µM)                                                                                                                                                                                                                                                                                                                         |

Table S6. Annotation of linear antibody expression cassettes

Linear expression cassettes For IGHC

|                            |                                                                                                                                                        |
|----------------------------|--------------------------------------------------------------------------------------------------------------------------------------------------------|
| CMV-FP_Primer              | [AGATATACGCGTTGACATTG] [ATTATTGACTAGTTATTAATAGTAATCAATTACGGGGTCATTAGTTTCATAGCCCATATATGGAGTTCGCGGTTACATAACTTACGGTAAATGGCCCGCTGGCTGACCGCCCAACGACCCCGCC   |
| CMV promoter               | ATTGACGTCATAATGACGTATGTTCCCATAGTAACGCCAATAGGGACTTTCATTGACGTCATGGGTGGAGTATTTACGGTAAACTGCCCACTGGGCAGTACATCAAGTGATCATATGCCAAGTACGCCCCCTATTGACGTCAATG      |
| CMV-RP_Primer              | ACGGTAAATGGCCCGCTGGCATTATGCCAGTACATGACCTTATGGGACTTTCCTACTTGGCAGTACATCTACGTATTAGTCATCGCTATTACCATTGGTGTGCGGTTTGGCAGTACATCAATGGCGTGGATAGCGGTTGACTCA       |
| G20_Primer                 | CGGGGATTTCCAAGTCTCCACCCATTGACGTCATAGGGAGTTTGTGTTGGCACAAAATCAACGGGACTTTCAAAATGTCGTAACAACTCCGCCCAATTGACGAAAATGGCCGGTAGCGGTGGAGGTTATATAAGCAG              |
| hman IGHG1 Constant region | AGCTCGTTTAGTGAAACCGTCAGATCGCTGGAGACGCCATCCACCGTGTGTTGACCTCCA) TAGAAGACACCGGGACCGATCCAGCTCCGGACTCTAGACTTCGAAATCTGCAGTCGA [CGGTACCGCGGGCCCGGGA] [2nd-PCR |
| WPRE                       | product] [CCCTCCACCAAGGCCATC] [GGTCTTCCCCCTGGCACCCCTCCCAAGAGCACCTCTGGGGGCACAGCGCCCTGGGCTGCCTGGTCAAGGACTACTTCCCCGAACCGGTGACGGTGTGCTGGAACCTAGCGCCCTG     |
| poly(A) signal             | ACCAGCGCGGTGCACACCTTCCGGCTGTCCTACAGTCCCTCAGGACTCTACTCCCTCAGCAGCGTGGTACCGTCCCTCCAGCAGCTTGGGACCCAGACCTACATCTGCAACGTGAATCAAGCCAGCAACACCAAGTGGACAA         |
| WPRE RP_Primer             | GAAAGTTGAGCCAAATCTTGTGACAAAACCTCACACATGCCACCGTCCAGCAGCTGAACTCCTGGGGGACCGTCACTTCCCTCTCCCCCAAAAACCAAGGACACCCCTCATGATCTCCCGGACCCCTGAGGTACATGCGTGG         |
|                            | TGGTGGAGCTGAGCCACGAAGACCTGAGGTCAAGTCAACTGGTACGTGGAGCGGTGGAGTGCATAATGCCAAGACAAGCCCGGGAGGAGCAGTACAACAGCAGCTACCGTGTGGTACGCGTCTCACCCTCTGACACAGGAC          |
|                            | TGGCTGAATGGCAAGGAGTACAAGTGAAGGTTCCAAACAAAGCCCTCCAGCCCACTCAGAGAAAACATCCAAAAGCAAAGGGCAGCCCGGAGAACACAGGTGTACACCTGCCCCATCCCGGATGAGCTGACCAAGAACCA           |
|                            | GGTACGCTGACCTGCCTGGTCAAAGGCTTCTATCCAGCAGCATCGCCGTGGAGTGGGAGAGCAATGGGAGCCGAGAAACAATACAAGACCCGCTCCCGTGTGGACTCCGACGGCTCTCTTCTCTACAGCAAGCTCACCG            |
|                            | TGGACAAGAGCAGGTGGCAGCAGGGGAACGTCCTCTCATGCTCCGTGATGATGAGGCTCTGCACAACCACTACACGCAGAAAGAGCCTCCCTGCTCCGGTAAATGA] GAATTCGCGGCGCGGAGTTGATATCT [CGACAATCAA     |
|                            | CCTCTGGATTACAAAATTTGTGAAAGATTGACTGGTATCTTAACTATGTTGCTCTTTTACGCTATGTTGGATACGCTGCTTTAATGCTTTGTATCATGCTATTGCTTCCCGTATGGCTTTCATTTCTCCTCTTGTATAAATCCTG      |
|                            | GTTGCTGTCTCTTTATGAGGAGTTGTGCCCGTTGTGAGCAACCTGGCGTGGTGTGCACTGTGTTTGTGACGCAACCCCACTGGTGGGCACTGGCCACACCTGTGACGCTCTTCCCGGACTTTTCGCTTTCCCTCTCCCTATTG        |
|                            | CCACGGCGGAACCTATCGCCCGCTGCTTGCCTGCTGGACAGGGCTCGCTGTTGGGCACTGACAAATCCGTTGGTGTGTCGGGGAAGCTGACGCTCTTCCATGGCTGCTCGCTGTGTCACCTGGATTCTGCGCGGGAGC             |
|                            | TCCTTCTGCTACGTCCTTCGGCCCTCAATCCAGCGGACCTTCTTCCCGCGGCTGCTGCGGCTCTGGGCTCTTCCGCTCTTCGCTTCCGCTCAAGCAGTTCGGATTCCTTTGGGCGGCTCCCGGCTGG] [AAACGGG              |
|                            | GGAGGCTAATGAAACACGGAAGGAGACAATACCAGGAAGAACCCGCGCTATGACGGCAATAAAAAGACAGAATAAAACGCACGGTGTGGTGTGTTGTTTATAAACCGGGGTTCCGTTCCAGGGCTGGCACTCTGTCGATACCC        |
|                            | ACCAGACCCCAATGGGGCAATACGCCCGCTTCTTCTCTTCCACCCCAACCCCAAGTTCGGGTGAAGGCCAGGGCTCGACGCAACGTCGGGGCGGACGGCCCTGCCATAGC] [AGATCTGCGCAGCTGGGGCT]                 |

Linear expression cassettes For IGKC(kappa)

|                            |                                                                                                                                                         |
|----------------------------|---------------------------------------------------------------------------------------------------------------------------------------------------------|
| CMV-FP_Primer              | [AGATATACGCGTTGACATTG] [ATTATTGACTAGTTATTAATAGTAATCAATTACGGGGTCATTAGTTTCATAGCCCATATATGGAGTTCGCGGTTACATAACTTACGGTAAATGGCCCGCTGGCTGACCGCCCAACGACCCCGCC    |
| CMV promoter               | ATTGACGTCATAATGACGTATGTTCCCATAGTAACGCCAATAGGGACTTTCATTGACGTCATGGGTGGAGTATTTACGGTAAACTGCCCACTGGGCAGTACATCAAGTGATCATATGCCAAGTACGCCCCCTATTGACGTCAATG       |
| CMV-RP_Primer              | ACGGTAAATGGCCCGCTGGCATTATGCCAGTACATGACCTTATGGGACTTTCCTACTTGGCAGTACATCTACGTATTAGTCATCGCTATTACCATTGGTGTGCGGTTTGGCAGTACATCAATGGCGTGGATAGCGGTTGACTCA        |
| K20_Primer                 | CGGGGATTTCCAAGTCTCCACCCATTGACGTCATAGGGAGTTTGTGTTGGCACAAAATCAACGGGACTTTCAAAATGTCGTAACAACTCCGCCCAATTGACGAAAATGGCGGTAGGCGTGTACGGTGGGAGGTTATATAAGCAG        |
| hman IGHG1 Constant region | AGCTCGTTTAGTGAAACCGTCAGATCGCTGGAGACGCCATCCACCGTGTGTTGACCTCCA) TAGAAGACACCGGGACCGATCCAGCTCCGGACTCTAGACTTCGAATTTCTGCAGTCGA [CGGTACCGCGGGCCCGGGA] [2nd-PCR |
| WPRE                       | product] [CGAATCTGCGGCTGACCATC] [TGTCTTCACTTCCCGCCATCTGATGAGCAGTTGAAATCTGGAACCTCCCTGCTGTTGTGTGCTGCTGCTCTTTATGAGGAGTTGTGGCCGTTGTGGCCGTTGTGGCAGTTCGCTG    |
| poly(A) signal             | CTCCAAATCGGTAATCCAGGAGAGTGTACAGAGCAGGACAGCAAGGACAGCCTACAGCCTCAGCAGCACCTGACGCTGAGCAAAGCAGACTACGAGAAAACAAGGCTACGCCCTGCAGGCTCACCCATCAGGGCTGAGCTC           |
| WPRE RP_Primer             | CCCGCTCACAAAGAGCTTCAACAGGGGAGAGTGTAG] GAATTCGCGGCGCGGAGTTGATATCT [CGACAATCAACCTCTGGATTACAAAATTTGTGAAAGATTGACTGGTATCTTAACTATGTTGCTCTTTTACGCTATGTTGGAAT   |
|                            | AGCGTCTTTAAGCCCTTTGATATCATGCTATGCTTCCCGTATGGCTTTCATTTTCTCCTCTGATATAAATCCTGGTGTGCTCTCTTTTATGAGGAGTTGTGGCCGTTGTGGCCGTTGTGGCAGTTCGCTGCTGTTGCTGAT           |
|                            | GCAACCCCACTGGTGGGCACTGGCCACACCTGTGACGCTCTTCCCGGACTTTTCGCTTTCCCTCTCCCTATTGGCCAGCGGGAACCTATCGCCGCTGCTTGGCCGCTGCTGGACAGGGGCTCGGCTGTGGGCACTGACAAATTC        |
|                            | CGTGGTGTGTCGGGGAAGCTGACGCTCTTCCATGGCTGCTCGCTGTGTCGCACTGGATTCTGCGCGGGAGCTCTTCTGCTACGCTCCCTTCGGCCCTCAATCCAGCGGACCTTCTCCCGCGGCTGCTGCGGCTCTGCGGCA           |
|                            | CTCTTCCCGCTTCCGCTTCCGCTCAGACGAGTCGGATCTCCCTTTGGGCGGCTCCCGGCTGG] [AAACGGGGAGGCTAATGAAACACGGAAGGAGCAATACCAGGAAGAACCCCGCTATGACGGCAATAAAAAGACAGAA           |
|                            | TAAAACGACCGGTTGGGTGCTTTGTTTATAAACCGGGGTTCCGTTCCAGGGCTGGCACTCTGTCGATACCCCAACCCAGGACCCATTTGGGGCAATACGCCCGGCTTCTTCTTTCCCAACCCCAACCCCAAGTTCGGGTGAA          |
|                            | GGCCAGGGCTCGCAGCAACGTCGGGGCGGACGGCCCTGCCATAGC] [AGATCTGCGCAGCTGGGGCT]                                                                                   |

Linear expression cassettes For IGLC (lambda)

|                            |                                                                                                                                                         |
|----------------------------|---------------------------------------------------------------------------------------------------------------------------------------------------------|
| CMV-FP_Primer              | [AGATATACGCGTTGACATTG] [ATTATTGACTAGTTATTAATAGTAATCAATTACGGGGTCATTAGTTTCATAGCCCATATATGGAGTTCGCGGTTACATAACTTACGGTAAATGGCCCGCTGGCTGACCGCCCAACGACCCCGCC    |
| CMV promoter               | ATTGACGTCATAATGACGTATGTTCCCATAGTAACGCCAATAGGGACTTTCATTGACGTCATGGGTGGAGTATTTACGGTAAACTGCCCACTGGGCAGTACATCAAGTGATCATATGCCAAGTACGCCCCCTATTGACGTCAATG       |
| CMV-RP_Primer              | ACGGTAAATGGCCCGCTGGCATTATGCCAGTACATGACCTTATGGGACTTTCCTACTTGGCAGTACATCTACGTATTAGTCATCGCTATTACCATTGGTGTGCGGTTTGGCAGTACATCAATGGCGTGGATAGCGGTTGACTCA        |
| L20_Primer                 | CGGGGATTTCCAAGTCTCCACCCATTGACGTCATAGGGAGTTTGTGTTGGCACAAAATCAACGGGACTTTCAAAATGTCGTAACAACTCCGCCCAATTGACGAAAATGGCGGTAGGCGTGTACGGTGGGAGGTTATATAAGCAG        |
| hman IGHG1 Constant region | AGCTCGTTTAGTGAAACCGTCAGATCGCTGGAGACGCCATCCACCGTGTGTTGACCTCCA) TAGAAGACACCGGGACCGATCCAGCTCCGGACTCTAGACTTCGAATTTCTGCAGTCGA [CGGTACCGCGGGCCCGGGA] [2nd-PCR |
| WPRE                       | product] [GGTCAGCCCAAGGCTGCCCC] [CTCGGTCACTCTGTTCCCGCTCTCTGAGGAGCTTCAAGCAACAAAGGCCACACTGGTGTGTCATAAGTGACTTCTACCCGGGAGCCGTGACAGTGGCTTGAAGGCAGATAGC       |
| poly(A) signal             | AGCCCGTCAAGCGGGAGTGGAGACCCACACCTCCAAAACAAAGCAACAAGTACGGGCCAGCAGTATCTGAGCCTGACGCTGAGCAGTGAAGTCCACAGAAGCTACAGCTGCCAGGTACGCATGAAGGGAGCACCTG                |
| WPRE RP_Primer             | GGAGAAGACAGTGGCCCTACAGAATGTTCAATAG] GAATTCGCGGCGCGGAGTTGATATCT [CGACAATCAACCTCTGGATTACAAAATTTGTGAAAGATTGACTGGTATCTTAACTATGTTGCTCTTTTACGCTATGTTGATACG    |
|                            | CTGCTTTAATGCTTTGATATCATGCTATGCTTCCCGTATGGCTTTCATTTTCTCCTCTGATATAAATCCTGGTGTGCTGCTCTTTATGAGGAGTTGTGGCCGTTGTGAGGCAACGTTGGCGTGGTGTGCACTGTGTTGCTGACGCA      |
|                            | ACCCCACTGGTGGGCACTGGCCACACCTGTGACGCTCTTCCCGGACTTTTCGCTTTCCCTCTCCCTATTGGCCAGCGGGAACCTATCGCCGCTGCTTGGCCGCTGCTGGACAGGGGCTCGGCTGTGGGCACTGACAAATCCGCT        |
|                            | GGTGTGTCGGGGAAGCTGACGCTCTTCCATGGCTGCTCGCTGTGTCACCTGGAATTCGCGGGAGGCTCTTCTGCTACGCTCTTCCCGCTCAATCCAGCGGACCTTCTTCCCGGCTGCTGCGGCTGTCGGGCTGTCGGGCTC           |
|                            | TTCCGCTCTGCTTCCGCTTCCGCTCAGACGAGTCGGATCTCCCTTTGGGCGGCTCCCGGCTGG] [AAACGGGGAGGCTAATGAAACACGGAAGGAGACAATACCAGGAAGAACCCCGCTATGACGGCAATAAAAAGACAGAATAA      |
|                            | AACGCACGGGTGTGGGTGCTTTGTTTATAAACCGGGGTTCCGTTCCAGGGCTGGCACTCTGTCGATACCCCAACCCAGGACCCATTTGGGGCAATACGCCCGGCTTCTTCTTTTCCCAACCCCAACCCCAAGTTCGGGTGAAGC        |
|                            | CCAGGGCTCGCAGCAACGTCGGGGCGGACGGCCCTGCCATAGC] [AGATCTGCGCAGCTGGGGCT]                                                                                     |



|     |        |                 |                 |            |                            |                |              |              |
|-----|--------|-----------------|-----------------|------------|----------------------------|----------------|--------------|--------------|
| 109 | 510G4  | IGHV4-31*03 F   | IGHD4-23*01 ORF | IGHJ4*02 F | ARDYGGNSNYFHY              | IGKV1-33*01 F  | IGKJ4*01 F   | QYDITLPLT    |
| 110 | 510H4  | IGHV3-66*01 F   | IGHD5-18*01 F   | IGHJ6*02 F | AETGWGDMVD                 | IGKV3-11*01 F  | IGKJ1*01 F   | QQRSNWPGT    |
| 111 | 510A5  | IGHV3-9*01 F    | IGHD3-9*01 F    | IGHJ4*02 F | AKDRGYEILTTFASFDY          | IGKV1-39*01 F  | IGKJ2*01 F   | QQSSTPPYT    |
| 112 | 510F6  | IGHV2-5*02 F    | IGHD5-18*01 F   | IGHJ4*02 F | AHSLPSKYSYSYGSFDY          | IGKV1-39*01 F  | IGKJ2*01 F   | QQSYSAPYT    |
| 113 | 510D7  | IGHV1-69*04 F   | IGHD5-18*01 F   | IGHJ4*02 F | ATGRYTYGYGYFDDY            | IGKV3-20*01 F  | IGKJ2*02 (F) | QQYSSRT      |
| 114 | 510E10 | IGHV3-23*01 F   | IGHD3-10*01 F   | IGHJ5*02 F | AKGELLWFGELLENWFDP         | IGKV1-12*01 F  | IGKJ1*01 F   | QQDSFPWT     |
| 115 | 510H10 | IGHV2-70*15 F   | IGHD6-13*01 F   | IGHJ4*02 F | ARIQRGIAADY                | IGKV1-39*01 F  | IGKJ2*02 (F) | QQSYSTPRT    |
| 116 | 510B1  | IGHV5-51*01 F   | IGHD3-10*01 F   | IGHJ3*02 F | ARLPHFGSGSYGNAFDI          | IGLV1-47*01 F  | IGLJ3*02 F   | ATWDDSLTGPV  |
| 117 | 510G2  | IGHV7-4-1*02 F  | IGHD3-10*01 F   | IGHJ6*02 F | ASTVGRGSGTYYYGNYSYSMDV     | IGLV2-14*01 F  | IGLJ2*01 F   | TSYTGSSSTSVV |
| 118 | 510H7  | IGHV4-59*08 F   | IGHD6-13*01 F   | IGHJ5*02 F | ARHCPWQQLVSNWFDP           | IGKV1D-13*01 F | IGKJ4*01 F   | QQFNNFLT     |
| 119 | 510H6  | IGHV1-46*01 F   | IGHD3-3*01 F    | IGHJ6*02 F | ARTGLFLPSKGGGMDV           | IGLV2-14*01 F  | IGLJ2*01 F   | SSYTSSSLQI   |
| 120 | 510C4  | IGHV3-48*03 F   | IGHD1-26*01 F   | IGHJ4*02 F | ARDPGEWESLDLDY             | IGLV1-40*01 F  | IGLJ3*02 F   | QSYDSSLGNWV  |
| 121 | 511A1  | IGHV4-31*03 F   | IGHD6-13*01 F   | IGHJ6*02 F | AREKIRISAAAGTVYYYGMDV      | IGKV3-15*01 F  | IGKJ1*01 F   | QQYNNWPPWT   |
| 122 | 511B4  | IGHV4-59*08 F   | IGHD3-22*01 F   | IGHJ5*01 F | ASTYWDSSGYGYVDY            | IGKV1D-12*01 F | IGKJ4*01 F   | QAANSFRLT    |
| 123 | 511E7  | IGHV5-51*01 F   | IGHD3-10*01 F   | IGHJ4*02 F | ALAVGRGIPTSYFDY            | IGKV1-33*01 F  | IGKJ3*01 F   | QQYHNLPIT    |
| 124 | 511G7  | IGHV3-33*01 F   | IGHD4-17*01 F   | IGHJ4*02 F | AKGGNYGDYLRGFDY            | IGKV1-33*01 F  | IGKJ4*01 F   | QQYHNVPVA    |
| 125 | 511E9  | IGHV1-18*01 F   | IGHD3-10*01 F   | IGHJ4*02 F | AREGAGLIAADY               | IGKV6-21*01 F  | IGKJ2*01 F   | HQSSSLPYT    |
| 126 | 511D11 | IGHV1-18*01 F   | IGHD2-15*01 F   | IGHJ6*02 F | AVLDYCSGGSSSSGYNYGMDV      | IGKV3-20*01 F  | IGKJ2*01 F   | QQYGRSPYT    |
| 127 | 511H11 | IGHV3-13*01 F   | IGHD6-19*01 F   | IGHJ6*03 F | VRGDHSSGWYGYTYYYMDV        | IGKV1-39*01 F  | IGKJ1*01 F   | QQSYSSPPWT   |
| 128 | 511D12 | IGHV3-66*01 F   | IGHD5-12*01 F   | IGHJ3*02 F | ARLDIADGAFDI               | IGKV1-9*01 F   | IGKJ5*01 F   | QLLNSFPIT    |
| 129 | 511A5  | IGHV4-31*06 F   | IGHD3-22*01 F   | IGHJ2*01 F | ARIYRGTMTVVVSDLHWYFDL      | IGLV3-21*04 F  | IGLJ1*01 F   | QVWSSADHYV   |
| 130 | 511E5  | IGHV1-2*02 F    | IGHD3-16*01 F   | IGHJ2*01 F | ARDSLSFRVDWYFDL            | IGLV1-40*01 F  | IGLJ2*01 F   | NSRDSSGNTVV  |
| 131 | 511G5  | IGHV1-46*01 F   | IGHD6-6*01 F    | IGHJ4*02 F | ARDGALYSNSPTFDY            | IGLV1-47*01 F  | IGLJ3*02 F   | TTWDSASRGWV  |
| 132 | 511H7  | IGHV1-46*01 F   | IGHD2-2*01 F    | IGHJ4*02 F | ARGGLVPVAVMPALDY           | IGLV1-47*01 F  | IGLJ3*02 F   | AAWDDSLSGPV  |
| 133 | 511B7  | IGHV3-23*01 F   | IGHD3-22*01 F   | IGHJ6*02 F | ARGLQYYDTSGYKDSYGYVDV      | IGLV1-47*01 F  | IGLJ3*02 F   | AAWDDSLSGPV  |
| 134 | 511B11 | IGHV3-7*03 F    | IGHD3-10*01 F   | IGHJ4*02 F | AGLFWYGGYFDY               | IGLV1-40*01 F  | IGLJ1*01 F   | QSYDRSLSVLYV |
| 135 | 59B11  | IGHV3-13*04 F   | IGHD3-3*01 F    | IGHJ6*03 F | ARGTQDRVELMVGSPYNYMDV      | IGKV1-39*01 F  | IGKJ2*01 F   | QQSYITTMVT   |
| 136 | 59D6   | IGHV4-34*01 F   | IGHD3-22*01 F   | IGHJ4*02 F | ARHRRDYITMIVRPTRLWAFDY     | IGLV1-40*01 F  | IGKJ2*01 F   | QSYSSLPVY    |
| 137 | 59A1   | IGHV3-66*01 F   | IGHD1-26*01 F   | IGHJ4*02 F | ARELPGVGGTDQ               | IGKV1-39*01 F  | IGKJ2*01 F   | QQSHSTPVT    |
| 138 | 59A2   | IGHV3-66*01 F   | IGHD2-15*01 F   | IGHJ4*02 F | ARDLPLHGDYFDY              | IGKV1-33*01 F  | IGKJ3*01 F   | QQSDNVPYT    |
| 139 | 59H6   | IGHV3-30*04 F   | IGHD2-15*01 F   | IGHJ4*02 F | ARETLGGYCNCGSCYDAGYFDY     | IGKV3-20*01 F  | IGKJ1*01 F   | QQYSSSPWT    |
| 140 | 59G12  | IGHV3-33*01 F   | IGHD3-3*01 F    | IGHJ4*02 F | ARDGVDFGMVTLFDY            | IGKV1-39*01 F  | IGKJ1*01 F   | QQSYNTPPWT   |
| 141 | 8B1E6  | IGHV4-4*02 F    | IGHD3-16*01 F   | IGHJ4*02 F | ARVQGLIDY                  | IGKV1-NL1*01 F | IGKJ2*02 (F) | QQYYSPPRT    |
| 142 | 8B1B1  | IGHV5-51*01 F   | IGHD6-13*01 F   | IGHJ6*03 F | ASQAAGGYYYMDV              | IGKV1-39*01 F  | IGKJ1*01 F   | QQSYNILWT    |
| 143 | 8B1H12 | IGHV3-23*01 F   | IGHD4-17*01 F   | IGHJ5*02 F | AKQTDYGVGWFDP              | IGKV1-33*01 F  | IGKJ4*01 F   | QQYDNFSLT    |
| 144 | 8B1E11 | IGHV1-69*06 F   | IGHD3-10*01 F   | IGHJ4*02 F | AVLPLHSSYNWYFDDY           | IGKV3-11*01 F  | IGKJ2*01 F   | QQRSNWPPGMYT |
| 145 | 8B2F2  | IGHV2-5*02 F    | IGHD6-13*01 F   | IGHJ5*02 F | AHQHRSNSWYVSAWFDP          | IGLV1-40*01 F  | IGLJ1*01 F   | QSYDSSLGNFV  |
| 146 | 8B5A6  | IGHV3-33*01 F   | IGHD6-13*01 F   | IGHJ4*02 F | AKGGWYSSKWWYFDDY           | IGKV2-28*01 F  | IGKJ1*01 F   | MQALQMG      |
| 147 | 8B2D5  | IGHV3-13*01 F   | IGHD4-17*01 F   | IGHJ3*02 F | ARGSDTVTTAFDI              | IGKV1-39*01 F  | IGKJ4*01 F   | QQSYTTPGLT   |
| 148 | 8B2H8  | IGHV3-53*04 F   | IGHD3-10*01 F   | IGHJ4*02 F | AREAPNSRSGSGTNFDY          | IGKV1-39*01 F  | IGKJ2*01 F   | QQSYSTPPYT   |
| 149 | 8B2D11 | IGHV3-33*01 F   | IGHD5-18*01 F   | IGHJ4*02 F | AKNGYSYAYPRQYFDY           | IGKV1-33*01 F  | IGKJ2*02 (F) | QHYDNLKVT    |
| 150 | 8B2E4  | IGHV4-31*03 F   | IGHD3-10*01 F   | IGHJ4*02 F | ARVSRYTMRGVIFDY            | IGLV2-23*02 F  | IGLJ2*01 F   | CLYAGHSTYVV  |
| 151 | 8B2G6  | IGHV4-38-2*02 F | IGHD2-21*02 F   | IGHJ4*02 F | ARVGVATILGVDDY             | IGLV6-57*03 F  | IGLJ3*02 F   | QSYDSSWV     |
| 152 | 8B2E12 | IGHV3-30*03 F   | IGHD6-19*01 F   | IGHJ6*02 F | AKGGYISAWSTRYYAMDV         | IGLV2-14*01 F  | IGLJ3*02 F   | SSYTSSTWV    |
| 153 | 8B3E9  | IGHV3-23*01 F   | IGHD6-13*01 F   | IGHJ4*02 F | AESSLTGNFNY                | IGLV3-21*03 F  | IGLJ3*02 F   | QVWDTAWV     |
| 154 | 8B5A1  | IGHV3-13*01 F   | IGHD5-18*01 F   | IGHJ4*02 F | ARGFDDTTGFYFDY             | IGKV1-NL1*01 F | IGKJ1*01 F   | QQDYNFPWT    |
| 155 | 8B5B6  | IGHV1-69*04 F   | IGHD3-10*01 F   | IGHJ6*03 F | ARTEYSYDSGSSRAYSMVDV       | IGKV1-39*01 F  | IGKJ1*01 F   | QQTHSTPRT    |
| 156 | 8B5E5  | IGHV7-4-1*02 F  | IGHD6-13*01 F   | IGHJ5*02 F | ARVGPSSSWPS                | IGKV1-39*01 F  | IGKJ1*01 F   | QQSYSTPRT    |
| 157 | 8B5C1  | IGHV3-33*01 F   | IGHD6-13*01 F   | IGHJ4*02 F | AKGGWYSSKWWYFDDY           | IGKV2-28*01 F  | IGKJ1*01 F   | MQALQMG      |
| 158 | 8B5F7  | IGHV3-7*01 F    | IGHD3-3*01 F    | IGHJ4*02 F | ARDLGLVWFGDPPY             | IGKV1-NL1*01 F | IGKJ1*01 F   | QQYYSAPRT    |
| 159 | 8B4G4  | IGHV2-5*02 F    | IGHD3-9*01 F    | IGHJ4*02 F | AHSPDRHYFDVLTGYFNRFYFDY    | IGLV1-51*01 F  | IGLJ2*01 F   | GTWDSLSAGV   |
| 160 | 8B4A7  | IGHV4-39*07 F   | IGHD6-6*01 F    | IGHJ6*02 F | ARIPRHLGQDHYYYVMDV         | IGLV2-23*01 F  | IGLJ1*01 F   | CSYAGIFV     |
| 161 | 8B4D9  | IGHV3-30*03 F   | IGHD5-18*01 F   | IGHJ4*02 F | AKAAGGGYSYIYWGDDY          | IGLV6-57*03 F  | IGLJ3*02 F   | QSYDSSNLWV   |
| 162 | 8B4E1  | IGHV4-61*01 F   | IGHD2-2*01 F    | IGHJ6*02 F | AREYFVSLPAAQTLYYYGIDV      | IGKV3-15*01 F  | IGKJ1*01 F   | QQYKNWPPWT   |
| 163 | 8B4H2  | IGHV1-8*02 F    | IGHD3-10*01 F   | IGHJ5*02 F | ARGLWFGDLTRTKYNWFDP        | IGKV3-20*01 F  | IGKJ4*01 F   | HOYDSSPLT    |
| 164 | 8B4A3  | IGHV1-46*01 F   | IGHD3-10*01 F   | IGHJ6*02 F | ARDPSSYNDNIDEWTRSENHNYGMDA | IGKV3-11*01 F  | IGKJ4*01 F   | QQRSNWPPYLT  |
| 165 | 8B4C5  | IGHV3-11*06 F   | IGHD6-19*01 F   | IGHJ4*02 F | ARDGSAVAGPMSYFDY           | IGKV1-NL1*01 F | IGKJ1*01 F   | QQYYSIPRT    |
| 166 | 8B4E5  | IGHV2-70*15 F   | IGHD6-19*01 F   | IGHJ4*02 F | AREVAGAVHLDY               | IGKV1-39*01 F  | IGKJ1*01 F   | QQSFSTPRT    |
| 167 | 8B4B6  | IGHV3-7*03 F    | N.D.            | IGHJ4*02 F | ARDLGLVWFGDLLF             | IGKV1-NL1*01 F | IGKJ1*01 F   | QQYSDPPRT    |
| 168 | 8B4E11 | IGHV4-59*01 F   | IGHD3-10*01 F   | IGHJ4*02 F | ARGGYYGPPRDFDY             | IGKV3-20*01 F  | IGKJ2*01 F   | QHYGSSPQYT   |
| 169 | 13G9   | IGHV1-58*01 F   | IGHD2-2*01 F    | IGHJ3*02 F | AAPYCSSTSCRDGFDI           | IGKV3-20*01 F  | IGKJ1*01 F   | QQYGRSPWT    |
